(Full version of article published in *Cardiovascular Research* (2003) containing source data and references, which was not possible to include in the published article due to lack of space.)

## Relationships between preclinical cardiac electrophysiology, clinical QT interval prolongation and torsade de pointes for a broad range of drugs: evidence for a provisional safety margin in drug development

W.S. Redfern<sup>a</sup>, L. Carlsson<sup>b</sup>, A.S. Davis<sup>c</sup>, W.G. Lynch<sup>d</sup>, I. MacKenzie<sup>e</sup>,  
S. Palethorpe<sup>a</sup>, P.K.S. Siegl<sup>f</sup>, I. Strang<sup>a</sup>, A.T. Sullivan<sup>g</sup>, R. Wallis<sup>h</sup>, A.J. Camm<sup>i</sup>,  
T.G. Hammond<sup>a,\*</sup>

<sup>a</sup>Safety Assessment UK, AstraZeneca R&D Alderley Park, Macclesfield, Cheshire SK10 4TG, UK;

<sup>b</sup>Cardiovascular Pharmacology, AstraZeneca R&D Mölndal, 431 83 Mölndal, Sweden;

<sup>c</sup>Animal Welfare Group, AstraZeneca R&D Alderley Park, Macclesfield, Cheshire SK10 4TG, UK;

<sup>d</sup>Drug Safety, AstraZeneca R&D Charnwood, Loughborough, Leicestershire LE11 5RH, UK;

<sup>e</sup>Covance Laboratories Limited, Otley Road, Harrogate, North Yorks HG3 1PY, UK;

<sup>f</sup>Merck Research Laboratories, P.O. Box 4, West Point, PA 19486-00047, USA;

<sup>g</sup>GlaxoSmithKline Safety Assessment, The Frythe, Welwyn, Herts, AL6 9AR, UK;

<sup>h</sup>Pfizer Global Research and Development, Sandwich Laboratories, Ramsgate Road, Sandwich, Kent CT13 9NJ, UK;

<sup>i</sup>Department of Cardiological Sciences, St George's Hospital Medical School, Cranmer Terrace, London SW17 0RE, UK.

Received 11 July 2002; accepted 21 November 2002

### Abstract

**Objective:** To attempt to determine the relative value of preclinical cardiac electrophysiology data (in vitro and in vivo) for predicting risk of torsade de pointes (TdP) in clinical use. **Methods:** Published data on hERG (or  $I_{Kr}$ ) activity, cardiac action potential duration (at 90% repolarisation;  $APD_{90}$ ), and QT prolongation in dogs were compared against QT effects and reports of TdP in humans for 100 drugs. These data were set against the free plasma concentrations attained during clinical use (effective therapeutic plasma concentrations;  $ETPC_{unbound}$ ). The drugs were divided into 5 categories: 1. Class Ia & III antiarrhythmics; 2. Withdrawn from market due to TdP; 3. Measurable incidence/numerous reports of TdP in humans; 4. Isolated reports of TdP in humans; 5. No reports of TdP in humans. **Results:** Data from hERG (or  $I_{Kr}$ ) assays in addition to  $ETPC_{unbound}$  data were available for 52 drugs. For Category 1 drugs, data for hERG/ $I_{Kr}$   $IC_{50}$ ,  $APD_{90}$ , QTc in animals and QTc in humans were close to or superimposed on the  $ETPC_{unbound}$  values. This relationship was uncoupled in the other categories, with more complex relationships between the data. In Category 1 (except amiodarone) the ratios between hERG/ $I_{Kr}$   $IC_{50}$  and  $ETPC_{unbound}$  (max) ranged from 0.1 to 31-fold. Similar ranges were obtained for drugs in Category 2 (0.31 to 13-fold) and Category 3 (0.03 to 35-fold). A large spread was found for Category 4 drugs (0.13 to 35,700-fold); this category embraced an assortment of mechanisms ranging from drugs which may well be affecting  $I_{Kr}$  currents in clinical use (e.g. sparfloxacin) to others such as nifedipine (35,700-fold) where channel block is not involved. Finally, for the majority of Category 5 drugs there was a >30-fold separation between hERG/ $I_{Kr}$  activity and  $ETPC_{unbound}$  values, with the notable exception of verapamil (1.7-fold), which is free from QT prolongation in man; this is probably explained by its multiple interactions with cardiac ion channels. **Conclusions:** The dataset confirms the widely-held belief that most drugs associated with TdP in humans are also associated with hERG  $K^+$  channel block at concentrations close to or superimposed upon the free plasma concentrations found in clinical use. A 30-fold margin between  $C_{max}$  and hERG  $IC_{50}$  may suffice for drugs currently undergoing clinical evaluation, but for future drug discovery programmes pharmaceutical companies should consider increasing this margin, particularly for drugs aimed at non-debilitating diseases. However, interactions with multiple cardiac ion channels can either mitigate or exacerbate the prolongation of APD and QT that would ensue from block of  $I_{Kr}$  currents alone, and delay of repolarisation *per se* is not necessarily torsadogenic. Clearly, an integrated assessment of in vitro and in vivo data is required in order to predict the torsadogenic risk of a new candidate drug in humans.

\*Corresponding author. Tel. +44 1625 514810; fax: +44 1625 513779

**Keywords:** K-channel; Ion channels; Long QT syndrome; ECG; Purkinje fibre.

**Time for primary review 36 days.**

© 2003 Published by Elsevier Science B.V. on behalf of European Society of Cardiology.

## 1. Introduction

Drug-induced QT interval prolongation and the appearance of torsade de pointes (TdP) has become recognised as a potential risk during treatment with a broad range of drugs including repolarisation-delaying antiarrhythmics [1], various antihistamines [2,3], antipsychotics [4], antimicrobial agents [5], and miscellaneous others [5,6,7,8,9,10]. For the vast majority of these agents it has been demonstrated that the slowing of repolarisation is a consequence of inhibition of the rapidly activating delayed rectifier potassium current ( $I_{Kr}$ ) in cardiac tissues, which is conveyed by the human ether-à-go-go-related gene-encoded voltage-dependent potassium channel (hERG  $K^+$  channel; IUPHAR classification: K<sub>v</sub>11.1 [11]).

In 1997, Committee for Proprietary Medicinal Products (CPMP) published a 'Points to Consider' document that made recommendations for nonclinical and clinical approaches to assess the risk of QT interval prolongation and TdP for non-cardiovascular drugs [12]. Since the appearance of this document, there has been much debate within the pharmaceutical industry as to the relative merits of various in vitro and in vivo techniques in detecting such activity preclinically [13,14,15]. A survey of practice within the industry conducted approximately two years after publication of the CPMP document indicated that whereas the industry was taking this issue very seriously, there was wide variability in approach [16].

One reason for the lack of confidence in the predictive value of the preclinical tests is that each drug associated with TdP in man appears to tell a different story in terms of its electrophysiological profile. Clearly there is a consensus about the importance of interactions with the hERG  $K^+$  channel but even so there is no agreement, either within the pharmaceutical industry or drug regulatory authorities, about what constitutes a safe margin. Risk assessment is further complicated when a drug acts on other cardiac ion channels in addition to the hERG  $K^+$  channel, as is often the case.

We therefore undertook a literature survey of nonclinical and clinical data on an initial list of 100 drugs, in order to assess the predictivity of the various types of data. The drugs were first categorised according to their torsadogenic propensity, then information on effective free therapeutic plasma concentration ( $ETPC_{unbound}$ ) with inhibition of hERG/ $I_{Kr}$  current, effects on cardiac action potential duration in vitro, prolongation of QT interval in dogs, and QT prolongation in man were collated and tabulated. It is hoped that these data, presented

together for the first time, will assist in the ongoing debate around the preclinical detection of torsadogenic propensity, provide evidence for setting provisional safety margins, and encourage further research.

## 2. Methods

The approach was as follows:

1. A list of 100 drugs was compiled (Table 1), covering a range of therapeutic classes. This list included the majority of drugs that have been associated with TdP or QT prolongation in man, together with other drugs that have no such association, but which have come under a certain degree of scrutiny because of therapeutic class, drug interactions, etc, in addition to drugs designed to delay cardiac repolarisation (i.e. Class Ia and III antiarrhythmics).
2. These drugs were assigned to 5 categories of torsadogenic propensity:

*Category 1:* Repolarisation-prolonging (Class Ia and Class III) antiarrhythmics (which have  $I_{Kr}$  block as an integral pharmacodynamic mechanism, and QT prolongation as an intended, desirable effect).

*Category 2:* Drugs that have been withdrawn or suspended from the market in at least one major regulatory territory due to an unacceptable risk of TdP for the condition being treated.

*Category 3:* Drugs that have a measurable incidence of TdP in humans, or for which numerous case reports exist in the published literature.

*Category 4:* Drugs for which there have been isolated reports of TdP in humans.

*Category 5:* Drugs for which there have been no published reports of TdP in humans. This category also contains some drugs (e.g. ketoconazole) which are associated with drug interactions leading to TdP, but which have not been associated with cases of TdP when used alone.

N.B. Erythromycin appears twice in the above list, as there are two formulations with different torsadogenic propensities: intravenous (Category 3) and oral (Category 4). Mibefradil was withdrawn from the market after less than a year due to drug interactions leading to TdP; however, there was no clear evidence that this drug caused TdP by itself [17], so it has not been assigned to Category 2. Instead, it has been assigned to Category 4, as there is one report of TdP in the literature [18] (see Table 1).

3. A master table was compiled (Table 2), containing the following information:
- (a) Drug name, drug category (as above), molecular weight;
  - (b) Published values and ranges for % plasma protein binding and  $ETPC_{total}$ ; these were obtained from online databases for drugs in current use (or from standard medical reference texts for older drugs) where possible [e.g. 19;20], in order to limit the number of references cited.  $ETPC_{unbound}$  (nM) were then calculated for each drug. Where published values for  $ETPC_{unbound}$  (nM) were available and were greater than those calculated, this higher value was used and the source reference is given in Table 2.
  - (c) Published  $IC_{50}$  values for  $I_{Kr}$  in mammalian cardiac tissue and from hERG-transfected cell lines. hERG data from *Xenopus* oocytes were not used unless there were no other hERG or  $I_{Kr}$  data available, and such data are indicated in Table 2. Data from hERG or  $I_{Kr}$  assays (hereafter referred to as 'hERG/ $I_{Kr}$ ') and all other electrophysiological data (see below) were derived from original references obtained via MEDLINE (between 1966 and May 2002).
  - (d) Published potency values for eliciting a 10-20% increase in the duration of the cardiac action potential at 90% repolarisation ( $APD_{90}$ ) in in vitro preparations. A 10% increase in  $APD_{90}$  is typically the minimum increase that reaches statistical significance in such studies, and is also the degree of change considered physiologically significant by the majority of pharmaceutical companies in a recent survey [16]. Frequently it was not possible to determine the concentration producing a 10-20% increase in  $APD_{90}$  interval, so the concentration producing the percentage increase in  $APD_{90}$  closest to this range was used, as indicated in Table 2.
  - (e) Published values for doses associated with 10-20% QTc prolongation in beagle dogs, or other species if dog data were unavailable. A 10% increase in QTc is typically the minimum increase that reaches statistical significance in conscious dog studies, and is also the degree of change considered physiologically significant by the majority of pharmaceutical companies in the same survey [16]. Frequently it was not possible to determine the dose producing a 10-20% increase in QTc interval, so the dose producing the percentage increase in QTc closest to this range was used, as indicated in Table 2. There are also examples where the percentage change is either not quoted in the original source reference or is not possible to calculate because of the absence of baseline data. In such cases the absolute change in QTc is given in Table 2.
  - (f) Published values for plasma concentrations associated with 10-20% QTc prolongation in beagle dogs, or other species if dog data were unavailable. Such data were found to be rarely available outside Category 1.
  - (g) Published values for doses associated with 10-20% QTc prolongation in humans. This degree of change was chosen in order to be consistent with data obtained from dogs. Plasma concentrations are given where available, but such data are extremely rare outside Category 1.
4. For 52 drugs where both  $ETPC_{unbound}$  and hERG (or  $I_{Kr}$ )  $IC_{50}$  data were available, the  $ETPC_{unbound}$  range was plotted schematically alongside the electrophysiology data from Table 2. For terfenadine, given that the QT prolonging effects are due to the parent compound whereas the antihistamine activity is due to the metabolite, data for  $ETPC_{unbound}$  were obtained from studies that had measured terfenadine in the presence of a cytochrome P450 inhibitor.
  5. The ratios of the lowest published hERG/ $I_{Kr}$   $IC_{50}$  value divided by the upper value for the  $ETPC_{unbound}$  range were calculated and plotted on a logarithmic scale for all 52 drugs.
  6. Of these 52 drugs, reasonably complete concentration-effect data were available for 3 drugs (one from each of categories 1, 2 and 5) for hERG/ $I_{Kr}$ ,  $APD_{90}$ , dog QT interval, and human QT interval, and these were plotted as overlay plots alongside the  $ETPC_{unbound}$  range.

### 3. Results

A list of the initial 100 drugs in the dataset is given in Table 1. It can be seen that they cover

a wide variety of therapeutic indications and dosing regimens. Table 1 also indicates the association of each drug with TdP; when assessing this, the number of years on the market should be taken into account, as an approximate guide to the extent of clinical experience with each particular drug.

Table 2 contains all the source data and associated source references for the subsequent plots. Eighteen drugs listed in Table 1 do not appear in Table 2 due to the absence of key information including therapeutic plasma concentrations and/or electrophysiology data; these are identified in Table 1. It can also be seen from Table 2 that numerous drugs have incomplete information; subsequent generation of this information would be extremely useful. Ultimately, from the original list of 100 drugs, 52 had data on both  $ETPC_{unbound}$  and  $hERG/I_{Kr}$ .

Figure 1 is a schematic plot of  $ETPC_{unbound}$  data alongside the in vitro and in vivo electrophysiology data, for the 52 drugs where data were available for both  $ETPC_{unbound}$  and  $hERG/I_{Kr}$ . For  $ETPC_{unbound}$  data, where ranges are available these are plotted; otherwise, a single concentration is presented. For the  $hERG/I_{Kr}$  data, the band is plotted from the minimum published  $IC_{50}$  value upwards. Data on effects on  $APD_{90}$  (lowest published values for concentrations causing a 10-20% increase in  $APD_{90}$  in in vitro preparations) were available for the majority of these drugs, including all drugs in Categories 1 and 2. Data on effects on QTc in animals (lowest published values for concentrations causing a 10-20% increase in QTc in vivo) and on QTc in humans (lowest published values for concentrations causing a 10-20% increase in QTc in humans) are also plotted where available.

### 3.1. $hERG/I_{Kr}$

There was a trend with respect to the  $hERG/I_{Kr}$   $IC_{50}$  values, in that the potency tended to be weaker when moving from Categories 2 to 5. However, the range of potencies within Category 1 was about as large as that covering the other 4 categories. Far more striking was the separation between  $ETPC_{unbound}$  (max) and the lowest quoted  $hERG/I_{Kr}$   $IC_{50}$  value. With the exception of amiodarone, most Category 1 drugs (*'Class Ia and Class III antiarrhythmics'*) had  $hERG/I_{Kr}$  activity close to or superimposed on their  $ETPC_{unbound}$  values. The same was true for Categories 2 (*'withdrawn/suspended due to TdP'*) and 3 (*'measurable incidence/numerous case reports of TdP'*). There was a mixed picture for drugs assigned to Category 4 (*'isolated reports of TdP in humans'*). Finally, for Category 5 drugs (*'no reports of TdP in*

*humans'*), there was a clear separation between  $hERG/I_{Kr}$  activity and  $ETPC_{unbound}$  values. There was one notable exception to this: verapamil, which is free from QT prolongation despite  $hERG/I_{Kr}$  activity close to its  $ETPC_{unbound}$  range.

### 3.2. $APD_{90}$

Figure 1 also indicates that for drugs in Category 1, concentrations causing a 10-20% increase in  $APD_{90}$  were reasonably close to the concentrations showing  $hERG/I_{Kr}$  activity and the  $ETPC_{unbound}$  range, as might be expected, with the exception of amiodarone. Most of the drugs in Category 2 also increased  $APD_{90}$  at concentrations close to the lowest published values for  $hERG/I_{Kr}$   $IC_{50}$  (Table 2; Figure 1). Data on effects on  $APD_{90}$  were only available for four drugs in Category 3 (thioridazine, bepridil, flecainide and erythromycin) for which  $hERG/I_{Kr}$  data were also available. In each case  $APD_{90}$  was increased, but at concentrations higher than those required to inhibit  $hERG/I_{Kr}$ ; for bepridil and flecainide  $APD_{90}$  was shortened at higher concentrations. There was no clear pattern to effects on  $APD_{90}$  in Category 4, with some drugs increasing this parameter and others decreasing it or having biphasic effects. Of the six drugs in Category 5 for which  $APD_{90}$  data (in addition to  $hERG/I_{Kr}$  data) were available, chlorpheniramine increased  $APD_{90}$ , verapamil had a biphasic effect, diltiazem decreased it, and ebastine and tamoxifen had no effect.

### 3.3. QTc in vivo

Similarly, for Category 1 drugs, concentrations causing a 10-20% increase in QTc in vivo were generally close to the  $ETPC_{unbound}$  range, the  $hERG/I_{Kr}$   $IC_{50}$  and the concentrations causing a 10-20% increase in  $APD_{90}$  (Table 2; Figure 1). Here again, the notable exception was amiodarone, where the QTc change was observed within the  $ETPC_{unbound}$  range, whereas the in vitro electrophysiology changes required much higher concentrations (as mentioned above). In Category 2, a 10-20% increase in QTc in vivo was achieved at lower concentrations than the  $hERG/I_{Kr}$   $IC_{50}$  for cisapride, sertindole and terfenadine, whereas for astemizole this effect was achieved within the published range of values for  $hERG/I_{Kr}$   $IC_{50}$  (Table 2; Figure 1).

### 3.4. QTc in humans

Again, for drugs in Category 1 the plasma concentrations resulting in a 10-20% increase in QTc in humans were close to those causing electrophysiological effects in the preclinical tests (Table 2; Figure 1). Unfortunately, such

data were rarely available outside this category, so no clear pattern can be discerned.

### 3.5. Margins between $hERG/I_{Kr}$ $IC_{50}$ and $ETPC_{unbound}$

The margins between free therapeutic plasma concentration and activity at  $hERG/I_{Kr}$  for these drugs are shown in Figure 2. These are the ratios of the lowest quoted  $hERG/I_{Kr}$   $IC_{50}$  value divided by the upper value for the  $ETPC_{unbound}$  range, plotted on a logarithmic scale. Within Category 1 (Class Ia & III antiarrhythmics), all the drugs listed had margins of <30-fold, with the exception of tedisamil (31-fold) and amiodarone (1,400-fold), which both have a low torsadogenic propensity. All drugs withdrawn/suspended from sale due to TdP (Category 2) had margins well below 30-fold (range 0.01 to 13-fold). Currently-marketed drugs associated with a measurable incidence/numerous reports of TdP (Category 3) also had margins of less than 30-fold, with the exception of pimozide which was just outside this value (35-fold). For drugs in Category 4 ('isolated reports of TdP'), there was a wide range of margins, from 0.13-fold (sparfloxacin) to 35,700-fold (nifedipine). Finally, for those drugs where there are no reports of TdP in clinical use (Category 5), the margins ranged from 23-fold to 3,311-fold, with the exception of verapamil (1.7-fold) and ketoconazole (11-fold). The apparent 'outliers' within each category are commented on in the Discussion.

Relatively few drugs in Category 5 have been investigated for effects on  $APD_{90}$  and QTc, so equivalent plots of  $APD_{90}$  and QTc margins would be of limited value, especially as there are complications of species differences, biphasic concentration-response curves, and imprecise or incomplete data (e.g. concentrations giving 10-20% increases not always available). Instead, representatives of categories 1, 2 and 5 have been chosen for overlay plots, to illustrate what would be possible with complete datasets. Figure 3 is a set of overlay plots for 3 drugs where concentration-effect data are available for most of the electrophysiological variables. These more detailed overlay plots confirmed and extended the above findings. For dofetilide (an example of a Category 1 drug) the concentration-effect plots for  $hERG/I_{Kr}$ ,  $APD_{90}$  and human QTc were superimposable. In the case of terfenadine (Category 2), the effects on  $APD_{90}$  and QT were either minimal or absent. For these two drugs the clinical free plasma concentration range encroached on the foot of the  $hERG$  concentration-response plots, whereas for tamoxifen (Category 5) there was

clear separation. Also, this drug had no effect on  $APD_{90}$  and QTc, and has not been associated with TdP.

## 4. Discussion

### 4.1. Mechanisms involved in torsade de pointes

TdP is a potentially life-threatening ventricular tachyarrhythmia characterised by QRS complexes continuously changing in morphology around an imaginary isoelectric line. The trigger for drug-induced TdP arrhythmias appears to be ventricular extra beats which can be induced by early afterdepolarisations (EADs) originating in cells with relatively long repolarisation phases (typically Purkinje fibres and/or midmyocardial cells). Whether focal activity or re-entrant pathways are responsible for the perpetuation of the arrhythmia is still unclear [8,21,55,56, 66] and both mechanisms may co-exist [22]. TdP episodes can either be self-terminating or degenerate into ventricular fibrillation.

Compelling evidence exists for  $I_{Kr}$  inhibition as a major risk factor for TdP, as will be discussed. Agents that act primarily by blocking the slowly activating delayed rectifier potassium channel ( $I_{Ks}$ ), or by retarding the inactivation (or the recovery from the inactivation) of the sodium and the L-type calcium channels impede repolarisation, and thus could be expected to provoke TdP. Mefloquine is an example of an  $I_{Ks}$  blocker (it is slightly more potent at inhibiting this current than at  $I_{Kr}$  [23], but also inhibits  $I_{Ca,L}$  [24]) within our dataset, yet it has not been associated with TdP. More widespread clinical experience with drugs that are relatively selective for  $I_{Ks}$  would be required before excluding a contribution of  $I_{Ks}$  block as a risk factor for TdP in humans. Other risk factors for drug-induced TdP include female gender, bradycardia, hypokalemia, drug-drug interactions, rapid drug administration (intravenous), structural heart disease, prolonged baseline QT interval and genetic variants (polymorphisms and mutations) [25]. It has been suggested that these risk factors act by reducing the net repolarising current, thereby limiting the 'repolarisation reserve' [26]. TdP can also occur as a result of localised cardiac ischaemia, and such arrhythmias are seen, albeit rarely, after myocardial infarction [27].

### 4.2. Limitations of the dataset

It is worthwhile discussing the limitations of our dataset before attempting to draw any conclusions from it. Firstly, it is restricted to drugs that have reached the market (or at least,

late stage clinical development), some of which have been tested for effects on QT in dogs, in a cardiac action potential preparation in vitro, and (for half of them) at hERG/I<sub>Kr</sub>. Up until now, quite understandably, in vitro electrophysiologists have focused their investigations on those drugs that have either been associated with QT prolongation and TdP in man, or have come under suspicion due to their therapeutic class. It is quite likely that a 'hERG screening of the pharmacopea' would unearth some potent hERG K<sup>+</sup> channel blockers that have never been associated with QT prolongation or TdP, to add to one such compound in our dataset: verapamil (see below). Secondly, the relative torsadogenic propensity in clinical use is difficult to judge within each of our categories, as this would also have to take into account the size and nature of the patient population, and the typical duration of treatment. In addition, some of the apparent incidences of TdP in Category 4 ('isolated reports of TdP') may have been misdiagnosed. Thirdly, estimates of free plasma concentrations are dependent on the accuracy of published data, particularly plasma protein binding. Finally, it should be noted that the purpose of compiling our dataset was entirely with *future* drug development in mind, and the collated information should not be applied retrospectively to re-assess torsadogenic risk for any of the drugs which comprise it. Furthermore, any new nonclinical electrophysiology findings on marketed drugs should not change risk assessment – if a drug has been used safely for several years without causing TdP, subsequent demonstration of activity in a hERG assay (for example) does not suddenly render it unsafe.

#### 4.3. Torsadogenic propensity of drugs that block the hERG K<sup>+</sup> channel

The number of drugs prolonging QT in man (excluding antiarrhythmics) is well over 100 [10], many of which have a long history of safe clinical use. An obvious question then arises: why are some drugs that are associated with QT prolongation apparently devoid of torsadogenic effects, whereas others are considered such a risk that they have been withdrawn or suspended from clinical use? Obviously, a decision to withdraw/suspend from sale does not necessarily relate solely to the incidence of TdP, as other factors such as the severity of the disease target and the availability of alternative drugs are taken into account before such a decision is reached. From the available evidence it does not appear to be related to dosing regimen or duration of therapy (Table 1).

One possible explanation is the margin

between the concentrations required for clinical efficacy and the concentrations producing inhibition of hERG/I<sub>Kr</sub> currents, prolongation of APD<sub>90</sub> or prolongation of QT interval. The hERG/I<sub>Kr</sub> data are simpler to work with, as there is a quantitative value (the IC<sub>50</sub>) which is rarely available for effects on the other parameters (APD<sub>90</sub> and QT interval). Also, whereas for Category 1 drugs the various effects (I<sub>Kr</sub> inhibition, increase in APD<sub>90</sub> and QT interval) occur at around the same concentration for each drug, within the other categories, drugs very often have different effects on APD<sub>90</sub> in different tissues, biphasic concentration-effect relationships, or both. In addition, the action potential data are subject to the complications of species differences, frequency-dependence, possible residual effects of anaesthetics used and, with some drugs, binding to non-biological surfaces within the perfusion system, whereas QT data are susceptible to problems caused by inappropriate correction for changes in heart rate and (for anaesthetised preparations) effects of commonly-used anaesthetics on QT interval [16]. Clearly we should focus on margins rather than absolute potency at the hERG K<sup>+</sup> channel: although all but one (grepafloxacin) of the drugs in Category 2 ('withdrawn/suspended from the market due to TdP') were more potent hERG/I<sub>Kr</sub> blockers than any of the drugs in Category 5 ('no reports of TdP'), the important differences between our 5 categories are to be found in the margin data (Figure 2).

From our dataset, generally speaking, drugs with little or no margin between ETPC<sub>unbound</sub> and hERG/I<sub>Kr</sub> IC<sub>50</sub> are associated with TdP in man, whereas those with a large margin are not. Notable exceptions to this are discussed below. Setting aside these 'outliers', the range of margins within each of Categories 1-3 were similar (approximately 0.01 to 30-fold), whereas those in Category 5 were greater than 30-fold, with the exception of phenytoin (23-fold) and cibenzoline (24-fold) which fell just short of this margin. Category 4 ('isolated reports of TdP') was an interesting 'mixed bag', containing one drug with hERG/I<sub>Kr</sub> activity within its therapeutic plasma concentration range (sparfloxacin), whereas the remainder at least had some therapeutic margin, as expected. It is possible that some other property (or lack of one) of this antibiotic mitigates against a high incidence of TdP.

#### 4.4. 'Anomalous' drugs

Although we should view margins as a continuum, a 30-fold margin between ETPC<sub>unbound</sub> and hERG/I<sub>Kr</sub> IC<sub>50</sub> appears to be a line of demarcation between the majority of

drugs associated with TdP and those which are not. However, there are some notable exceptions to this: amiodarone (1400-fold), fluoxetine (106-fold), ciprofloxacin (183-fold), diphenhydramine (880-fold), and nifedipine (35,700-fold), which have each been associated with TdP (Table 1). Conversely, the margin for verapamil is less than two-fold, yet this drug does not prolong QT, let alone induce TdP; ketoconazole also has a small (11-fold) margin but apparently is not proarrhythmic. What are the possible explanations for the ‘false negatives’ and the two ‘false positives’? *Amiodarone* is an atypical Class III antiarrhythmic, and some commentators have questioned whether it should really be considered to belong to this class [14], as it also exhibits class I, II and IV activity, together with vasodilator and anti-ischaemic effects [28], and requires chronic treatment for development of its antiarrhythmic effects [28]. It is worth comparing and contrasting the pharmacology of *bepidil* and *verapamil*, as they are both classed as ‘calcium channel antagonists’, yet both have a variety of other actions. In the case of *bepidil*, this is a complex drug with actions on other ionic currents including  $I_{Ks}$  [29;30], and it also has negative chronotropic effects [31] which would contribute towards promoting the conditions that enable TdP to occur. Verapamil on the other hand does not have bradycardic actions, does not affect  $I_{Ks}$  current [30] and does not prolong QT [32]. *Ketoconazole* also has a small margin (11-fold), yet has not been associated with TdP when administered as the sole medication. Its well-known interactions with terfenadine leading to TdP have largely been ascribed to its inhibition of CYP3A4 [2]. However, ketoconazole does prolong QT interval by itself in guinea-pigs [33,34,35], and so an additive effect in blocking the hERG  $K^+$  channel may contribute to the proarrhythmic potential of this co-therapy. There has been only one report of TdP with *fluoxetine* since its launch in the mid-1980s, in an elderly female patient [36]. The authors hypothesised that this episode could have been due to enhancement of 5-HT-induced vasoconstriction, which has been observed to occur in coronary arteries with damaged endothelium. The incidence of TdP with *ciprofloxacin* is extremely low (0.3 cases per 1 million prescriptions), this value based on two reports as part of a historical cohort study over a 5.5-year period [37]. These were not accompanied by any ECG recordings, details of the patients, or information on any co-therapy, so it remains unproven as to whether the episodes were due directly to the drug. In terms of explaining these events, ciprofloxacin is

known to cause release of histamine [38], which in turn could cause coronary vasoconstriction [39], and it is conceivable that this could have pathophysiological consequences in susceptible individuals under very rare circumstances. It is not too fanciful to propose this as an explanation of an event occurring in two recipients of a total of ~66 million prescriptions. *Diphenhydramine* has been widely available since the mid-1940s, both as a prescription drug and in various over-the-counter medicines, yet we could only find two apparent cases of TdP in the literature. As there were no details given as to co-therapy, underlying disease, or the arrhythmia itself, these two cases cannot confidently be ascribed to an effect of this drug. As with ciprofloxacin, these reports were part of a historical cohort study and were not accompanied with any details of the patients [40]. These reports are surprising in view of the absence of TdP with this drug even after overdose [41]. Perhaps the largest anomaly of all is the huge margin for *nifedipine*. There have been two reports of TdP in over 20 years of clinical use of this drug. Both of these were in patients with cardiovascular disease, and both episodes were attributed to localised myocardial ischaemia caused by coronary ‘steal’ due to this vasodilator [42;43;44;45]. It is obvious from the ratio of  $ETPC_{unbound}$  to hERG  $IC_{50}$  for nifedipine that these two cases were not due to effects on  $I_{Kr}$  currents. It is also worth mentioning erythromycin: most of the reported cases of TdP have been observed after rapid intravenous injection of the drug, where plasma concentrations can reach the micromolar range [46].

#### 4.5. Possible explanations for the size of margin

Examination of hERG concentration-effect curves in transfected cell lines (see Table 2 for references; also see Figure 3 for examples) reveals that for all drugs there is at most approximately one log order of magnitude between a ‘threshold effect’ and the  $IC_{50}$ . Therefore, in theory one would expect that a 10-fold margin between  $ETPC_{unbound (max)}$  and the hERG  $IC_{50}$  would suffice, whereas in practice the ‘safe’ margin appears to be 30-fold (Figure 2). There are various possible explanations for this. Firstly, occasionally in individuals the plasma concentrations may exceed the values for  $ETPC_{unbound (max)}$  listed in Table 2, and the concentrations may encroach on the functioning of the hERG  $K^+$  channel. This could occur as a result of accidental overdose, or because of individual variations in plasma protein binding [47], or in drug metabolism. Secondly, many of these agents are lipophilic, and accumulation

may occur in myocytes either intracellularly or within the cytoplasmic membrane, so that the local concentration in the vicinity of the hERG  $K^+$  channel may exceed the free plasma concentration [48]. Thirdly, the potency at transfected hERG channels may be lower than that occurring *in vivo*, due to the absence of ancillary subunits and other biochemical factors. In addition, there may be individual variations in the functionality of the hERG  $K^+$  channel (e.g. channel density), or fluctuations in function due to changes in electrolyte concentrations.

A debate has also begun about whether to use  $IC_{20}$  values or even  $IC_{10}$  values for hERG instead of the  $IC_{50}$ . The rationale for retaining the use of  $IC_{50}$  values is obvious, as this is the most accurate measurement that can be made from a sigmoidal log concentration-effect curve, and in the case of hERG assays, as indicated above, the shape and slope of the curves are very similar across nearly all drugs tested. It is therefore better to retain the most accurate and familiar measure of drug potency at the hERG  $K^+$  channel (i.e., the  $IC_{50}$ ) and adjust the safety margins upwards accordingly, rather than to set a smaller margin based on an intercept derived from an unreliable part of the sigmoidal log concentration-effect curve, barely above the background noise. However, this statement should not be taken to mean that a 10-20% inhibition of  $I_{Kr}$  current is of negligible physiological significance: from our dataset it is reasonable to conclude that a 10-20% inhibition of  $I_{Kr}$  current in a hERG assay would translate into detectable increases in  $APD_{90}$  and QT interval, at least for those compounds where the inhibition of  $I_{Kr}$  is not offset by interactions at other cardiac ion channels.

#### 4.6. Mixed ion channel activity

From our dataset (Table 2) it would appear that drugs which are relatively selective for the hERG  $K^+$  channel compared to other cardiac ion channels (especially Class Ia and III antiarrhythmics, with the exception of amiodarone) have concentration-effect curves for inhibition of hERG/ $I_{Kr}$ ,  $APD_{90}$  and QT interval (in dog and human) that are virtually superimposable (Figures 1 and 3). Those with mixed ion channel activity (e.g. terfenadine) do not: the concentrations required for prolongation of  $APD_{90}$  and QT interval are dissociated from those blocking hERG/ $I_{Kr}$ . Presumably their effects on other ion channels (primarily the sodium and L-type calcium channels) offsets the effects of inhibition of  $I_{Kr}$  on  $APD_{90}$  and QT interval.

In order to assess the impact of mixed channel

activity on torsadogenic propensity, we should first consider the torsadogenic potential of selective hERG  $K^+$  channel blockers. The following drugs from the dataset are relatively selective hERG  $K^+$  channel blockers: almokalant, dofetilide, cisapride, astemizole, and sertindole. Each of these drugs has a potency at hERG in the low nM range (i.e. 50 nM or less), and has either been associated with TdP in clinical trials (dofetilide, almokalant), or has been withdrawn from sale due to an unacceptably high incidence of TdP (cisapride, astemizole, sertindole). Therefore, it would seem that relatively selective hERG  $K^+$  channel blockers thus far have been associated with TdP in humans, when plasma concentrations enter the range for inhibition of the channel. So if hERG  $K^+$  channel block is a key risk factor, it is conceivable that the plasma concentration required for arrhythmogenesis with some mixed-activity compounds could be quite precise – at a certain concentration the combined ion channel effects may interact to produce the conditions for arrhythmogenesis. In this hypothetical scenario, the risk of TdP would be reduced at concentrations above and below this critical point. Evidence exists for this hypothesis in the case of quinidine, for example [49].

One point to make here is that we should not take comfort in a non-antiarrhythmic candidate drug with mixed channel activity that is active at the hERG  $K^+$  channel at concentrations close to its therapeutic range, but produces relatively little QT prolongation. Given that the holy grail of Class III antiarrhythmic research programmes is to achieve agents with the ‘right’ balance of ion channel activity [50], the likelihood of a non-antiarrhythmic research programme achieving this by good fortune is surely quite low. Put another way, we are more likely to end up with a ‘terfenadine’ than a ‘verapamil’. We should ask ourselves whether we want potent activity at a range of cardiac ion channels in (say) a drug to treat arthritis.

#### 4.7. Other risk factors

Although it may be the case that the relatively selective hERG  $K^+$  channel blockers in our list are torsadogenic, drugs with the same potency at the channel may not necessarily carry the same torsadogenic risk. The nature of the interaction with the channel may be important; for example, it has been postulated that there may be multiple binding sites on the channel [51] even for a single drug (bepridil) [29], as well as for different classes of drugs, including the possibility of intracellular binding sites [52]. Also, different drugs bind to the channel in its



different states (closed, open, inactivated) [51,53]. There are likely to be further developments in this area. Regardless of how a particular drug binds to the hERG K<sup>+</sup> channel, the prolongation of APD<sub>90</sub> that ensues may not be the defining factor in terms of arrhythmogenesis: the ensuing shape and stability of the action potential may be critical. Prolongation of APD<sub>90</sub> together with shortening of APD<sub>30</sub> (i.e. ‘triangulation’) appears to be associated with known arrhythmogenic compounds in a rabbit Langendorff-heart preparation, and leads to the appearance of EADs, whereas prolongation of APD<sub>90</sub> per se is antiarrhythmic [54]. Other risk factors for arrhythmogenesis are temporal instability of the action potential duration within a train, and reverse-frequency dependence [54]. Finally, at the multicellular level there is heterogeneity in sensitivity of cell types across the ventricular wall to prolongation of APD by any given drug, and the sensitivity range varies between drugs [55,56].

There are several examples in our dataset of drugs that would be expected to completely inhibit I<sub>Kr</sub> currents within their therapeutic range (e.g. quinidine, ibutilide, terodiline, thioridazine). Yet even when there is complete inhibition of I<sub>Kr</sub> current within the myocardium, episodes of TdP do not occur continuously: such electrophysiological conditions merely increase the risk of such episodes occurring. So inhibition of I<sub>Kr</sub> currents leads to two distinct, crucial abnormalities, both reflected by QT prolongation: delayed repolarisation and instability of action potentials in Purkinje fibres and M-cells, leading to the focal genesis of EADs, and dramatic transmural heterogeneity of ventricular repolarisation, enabling propagation of the premature depolarising wavefront and the development of TdP [8,21,55,56,66]. Drugs that merely prolong action potential without causing instability, or do not result in QT dispersion, would not necessarily be torsadogenic.

## 5. Summary and recommendations

### 5.1. Importance of I<sub>Kr</sub> inhibition as a feature of torsadogenic agents

Our dataset has confirmed that I<sub>Kr</sub> inhibition is a common feature of drugs that induce TdP in man (with the exception of drugs that may induce or exacerbate myocardial ischaemia, resulting in TdP as an extremely rare event). The available evidence indicates that block of hERG K<sup>+</sup> channels (either selectively or in conjunction with effects on other ion channels) is associated with TdP if it occurs at concentrations close to those achieved in

clinical use. Block of hERG K<sup>+</sup> channels is a risk factor in drug-induced TdP, and probably the predominant risk factor, but it requires a combination of factors, possibly coming together in a rare combination at one point in time (i.e. over a few cardiac cycles), to trigger the event.

### 5.2. Preclinical strategies for assessing torsadogenic risk

Whilst our understanding of the relationship between inhibition of I<sub>Kr</sub> and the risk of TdP is progressing rapidly, a pragmatic approach for the pharmaceutical industry would be to limit structural/physicochemical similarities to hERG K<sup>+</sup> channel blockers, then be guided by the chemical series with the least hERG activity. Structural requirements for binding to the hERG K<sup>+</sup> channel have been characterised, at least for antihistamines [57,58,59] and class III antiarrhythmics [60], and the binding sites on the hERG protein have been modelled [61,62]; nonetheless, a significant effort is required to better understand these structure-activity relationships. However, series with hERG activity need not necessarily be rejected: it depends on the severity of the therapeutic target (see below). Data on hERG activity is useful in the early stages of drug discovery, but as the research project progresses, not only is it prudent to establish the effects on the cardiac action potential, this is recommended by regulatory authorities prior to human exposure [12]. The final risk assessment prior to Phase I clinical trials has to be based on both the in vitro and in vivo data, with the latter derived from both safety pharmacology and toxicology studies. Recommendations on optimal study design (both in vitro and in vivo) have been offered previously [16], several commentators have proposed strategies for preclinical [7,48,63,64,65] and clinical assessment [7,48,66] of torsadogenic risk, and the current views of regulatory authorities have also been discussed, at least informally [67,68,69]. The capability of the pharmaceutical industry to detect QT prolongation in preclinical tests has improved substantially over recent years, but a significant challenge still remains to identify proarrhythmic potential reliably.

The following recommendations merely relate to the information that should be acquired before a decision is taken to enter clinical evaluation; exactly when these tests are done is a matter of choice for the individual companies, and perhaps for individual projects within those companies. So, our proposal would simply be as follows:

- (i) determine an IC<sub>50</sub> at hERG in a

- (ii) transfected mammalian cell line; test the effects of the compound on mammalian cardiac action potential in any well-characterised in vitro preparation;
- (iii) test the compound for effects on QT interval in vivo, either by telemetry or using anaesthesia, applying either a suitable correction for heart rate changes or a regression approach [16], or alternatively, cardiac pacing.

Much debate has taken place since the CPMP document [12] concerning the selection of an in vitro preparation for detecting drug-induced changes in cardiac action potential, and species differences have been studied systematically in the case of Purkinje fibres [70]. However, we feel that if accompanied by evaluation of hERG activity, the choice of preparation is less important than when this was the mainstay of the in vitro evaluation. The reason for this is that if a drug slows repolarisation in a concentration-dependent manner as predicted from its activity at hERG, then it can reasonably be assumed that it does not possess significant activity at other cardiac ion channels (cf. cisapride in Table 3). If it does not (cf. terfenadine in Table 3), then a further investigation of effects at other cardiac ion channels is required. Computer models may assist with interpretation of effects on action potential characteristics [71]. So, in brief, any well-characterised in vitro cardiac preparation may be used, according to the availability of tissue and the expertise within the laboratory, so long as the outcome is interpreted alongside the hERG data.

### 5.3. Safety margins

Our dataset suggests that a margin of 30-fold between hERG  $IC_{50}$  and  $C_{max}$  would be adequate to ensure an acceptable degree of safety from arrhythmogenesis, with a low risk of obtaining false positives. The same margin has been proposed previously based on opinion [65], and has also been suggested on the basis of a smaller dataset of drugs [72]. We would recommend that this margin is acceptable for all drugs currently undergoing clinical development. However, for the future, one should aim for higher margins where possible, as then the concerns over drug interactions, variable pharmacokinetics, and all the other risk factors would recede. This would also address issues of inter-laboratory variability in hERG  $IC_{50}$  data (as evident in Table 2): we have used the lowest published hERG  $IC_{50}$  values to arrive at provisional safety margins, but it is likely that

any single laboratory would derive a value for any particular drug somewhere within the published range rather than at the lower limit.

Obviously margins should reflect disease severity and medical need. For example, one could envisage that a 10-fold margin might be acceptable for drugs used in diseases which are lethal if untreated (e.g. cancer, AIDS, some other infections, etc), a 30-fold margin may be acceptable for drug treatments for serious debilitating diseases (e.g. stroke, Parkinson's disease, schizophrenia, epilepsy, asthma, arthritis, etc), but a margin of 100-fold or even higher might be required in the case of less serious diseases (e.g. Raynaud's, seasonal rhinitis, eczema, etc). These higher margins would also be appropriate for drugs prescribed to psychiatric patients at risk from suicidal overdose. Furthermore, one has to consider changes to therapeutic target, patient population, and route of administration.

The emphasis here should be on '*provisional margins as a starting point*' – an integrated evaluation of in vitro and in vivo electrophysiology data is essential for risk assessment, and will ultimately be superseded by clinical data. Drugs with small margins for hERG activity are not necessarily unsafe, as evidenced by several that have been in safe use for years, generally due to the mitigating effects of actions at other ion channels. However, for the purposes of future drug development, candidate drugs with a margin smaller than 30-fold (for hERG  $IC_{50}$ , 10% increase in  $APD_{90}$ , or 10% increase in QT interval – whichever is the smallest margin) over the  $C_{max}$ , would probably require evaluation in a proarrhythmic model, and the clinical programme may have to be augmented [12]. At the other end of the margin scale, despite our best efforts, some new drugs may induce TdP in susceptible individuals as extremely rare events by indirect mechanisms unrelated to actions at ion channels.

### 5.4. 'Class effects'

It is clear from our dataset that potency in hERG assays, prolongation of  $APD_{90}$  and QT, and torsadogenic risk, have little to do with therapeutic class. The hERG  $K^+$  channel shows promiscuous binding characteristics across a wide range of chemical structures [53]. Obviously, if similar molecular structures have been synthesized using an opportunistic approach in order to improve on a marketed drug, then if one of these drugs has hERG activity, this may well be shared by all its competitors to a greater or lesser extent, but this is not a 'class effect' in the strictest sense of the term. Except in the case of Class Ia and III

antiarrhythmics, for adverse effects so remote from their target organs, and with a molecular mechanism quite distinct from their primary molecular target, the use of the term ‘class effect’ is unhelpful here. It is probably also unnecessary to invoke this term when considering torsadogenic risk, so long as preclinical data from the strategy outlined above (hERG IC<sub>50</sub>, effects on cardiac action potential, QT interval) are collated for submission to regulatory authorities. Astemizole and cetirizine are both non-sedating antihistamines, yet whereas astemizole is an extremely potent hERG blocker with a margin around 3-fold, and was withdrawn after approximately 16 years on the market due to an unacceptable risk of TdP, cetirizine is a very weak hERG blocker, with a margin approaching 2,000-fold, and has been used clinically for the same period of time without a single report of TdP.

#### 5.5. Concluding remarks

Although ‘torsade de pointes’ was first characterized by Dessertenne in 1966 [73], the electrocardiographic features had been reported more than forty years earlier [74], and sudden deaths due to antipsychotic drugs were documented soon after their introduction in the 1950s [75]. It is therefore not a new phenomenon, and the CPMP’s 1997 ‘Points to Consider’ document [12] was arguably long overdue. Hopefully our survey of the published literature has helped to clarify the task of preclinical risk assessment with respect to pro-arrhythmic potential of new drugs. The more drugs with a long track record of clinical use for which there are full datasets on in vitro and in vivo cardiac electrophysiology, the clearer our understanding will become. The challenge to the pharmaceutical industry is to minimise hERG activity so as to eliminate the major risk factor, but not at the expense of discarding therapeutically useful drugs that are urgently required to treat a myriad of diseases for which there is presently a paucity of quality treatment.

Table 1

Background information on the initial list of 100 drugs selected for this literature survey

|                         | <b>Drug class/application</b> | <b>Market span</b>                   | <b>Recommended adult dosage</b> | <b>Typical duration of treatment</b> | <b>Association with TdP</b>                                                  | <b>TdP on label</b> |
|-------------------------|-------------------------------|--------------------------------------|---------------------------------|--------------------------------------|------------------------------------------------------------------------------|---------------------|
| <b>CATEGORY 1</b>       |                               |                                      |                                 |                                      |                                                                              |                     |
| Ajmaline                | Class Ia antiarrhythmic       | 1993-                                | 200-300 mg o.d.                 | Long term                            | Isolated reports of TdP after i.v. use only [76]                             |                     |
| Disopyramide            | Class Ia antiarrhythmic       | 1982-                                | 300-800 mg o.d.                 | Long term                            | Probably ~1-8% [77]                                                          | Yes                 |
| Procainamide            | Class Ia antiarrhythmic       | 1985-                                | 50 mg/kg o.d.                   | Long term                            | Numerous reports of TdP [76;1;66]                                            | Yes                 |
| Quinidine               | Class Ia antiarrhythmic       | 1918-                                | 200-400 mg t.i.d./q.i.d.        | Long term                            | 1-8.8% [1;77;66]                                                             | Yes                 |
| Almokalant              | Class III antiarrhythmic      | Discontinued after Phase III trials  | 4.5-29 mg                       | Long term?                           | Development stopped pre-market due to TdP                                    | N/A                 |
| Amiodarone              | Class III antiarrhythmic      | 1982-                                | 200 mg o.d.                     | Long term                            | 0.7% Incidence [77]                                                          | Yes                 |
| Azimilide               | Class III antiarrhythmic      | 1999-                                | 100-125 mg o.d.                 | Long term                            | 0.9% Incidence [78]                                                          |                     |
| Clofilium <sup>†</sup>  | Class III antiarrhythmic      | Discontinued after Phase III trials? | 20-300 µg/kg i.v.               | Single dose only investigated        | No reports; not marketed                                                     | N/A                 |
| Dofetilide              | Class III antiarrhythmic      | 2000-                                | 0.1-0.5 mg b.i.d.               | Long term                            | 1-4% Incidence [77]; 3-4% i.v., 0.8-1.5% oral [Al-Dashti & Sami, 01]         | Yes                 |
| Ibutilide               | Class III antiarrhythmic      | 1996-                                | 1-2 mg i.v.                     | Acute                                | 8.3% Incidence (i.v. use) [79]                                               | Yes                 |
| Sematilide              | Class III antiarrhythmic      | Discontinued after Phase III trials  | 75-200 mg t.i.d.                | Long term                            | 1 report, high i.v. dose [80]                                                |                     |
| D,L-sotalol             | Class III antiarrhythmic      | 1970s                                | 160-320 mg o.d.                 | Long term                            | 1.8-4.8% Incidence [5;66]                                                    | Yes                 |
| Tedisamil               | Class III antiarrhythmic      | Currently in Phase II trials         | 50-100 mg b.i.d.                | Long term                            | No reports to date.                                                          |                     |
| Terikalant <sup>†</sup> | Class III antiarrhythmic      | Discontinued                         | No information in humans        | No information in humans             | No reports to date.                                                          | N/A                 |
| <b>CATEGORY 2</b>       |                               |                                      |                                 |                                      |                                                                              |                     |
| Astemizole              | Antihistamine                 | 1983-1999                            | 10 mg i.d. (30 mg i.d.) [81]    | > 7 days [81]                        | Very low: 8.5 per 10,000 person-years [82]; withdrawn from market due to TdP | Yes                 |
| Cisapride               | Prokinetic                    | 1988-2000                            | 10 mg t.i.d./q.i.d.             | 4 weeks for dyspepsia; 12            | Very low (1/120,000) [5]; withdrawn from market due to TdP                   | Yes                 |

|                           | Drug class/application             | Market span | Recommended adult dosage                                            | Typical duration of treatment weeks for GORD | Association with TdP                                                                               | TdP on label |
|---------------------------|------------------------------------|-------------|---------------------------------------------------------------------|----------------------------------------------|----------------------------------------------------------------------------------------------------|--------------|
| Droperidol                | Antipsychotic                      | 1970-2001   | 5-20 mg t.i.d. [81]                                                 | Acute tranquillisation                       | Withdrawn from market due to TdP                                                                   | Yes          |
| Grepafloxacin             | Antibiotic                         | 1997-1999   | 600 mg o.d.                                                         | 10 days                                      | Several cases of TdP and sudden cardiac deaths [83]; withdrawn from market due to TdP              | Yes          |
| Levomethadyl <sup>†</sup> | Opioid agonist (heroin dependency) | 1993-2001   | According to need (up to 100 mg three times a week have been given) | Short term                                   | Several cases of TdP reported [84]; withdrawn from use in EU due to TdP; use restricted in US [19] | Yes          |
| Prenylamine <sup>†</sup>  | Anti-anginal                       | 1960s-1988  | 60 mg t.i.d. max 300 mg daily                                       | Long term                                    | Withdrawn from market due to TdP                                                                   |              |
| Sertindole                | Antipsychotic                      | 1996-1998   | 12-20 mg o.d.                                                       | Long term                                    | Withdrawn from market due to TdP                                                                   | Yes          |
| Terfenadine               | Antihistamine                      | 1982-1997   | 120 o.d.                                                            | Seasonal                                     | Very low: 1.0 per 10,000 person-years [82]; withdrawn from market due to TdP                       | Yes          |
| Terodiline                | Bladder incontinence               | 1986-1991   | 25 mg b.i.d.                                                        | Long term                                    | Incidence unknown; several cases documented [78;85]; withdrawn from market due to TdP              |              |

### CATEGORY 3

|                   |                         |       |                       |           |                                                                                                                            |     |
|-------------------|-------------------------|-------|-----------------------|-----------|----------------------------------------------------------------------------------------------------------------------------|-----|
| Aprindine         | Class Ib antiarrhythmic | 1982- | 50-100 mg o.d.        | Long term | Several cases documented [1]                                                                                               |     |
| Bepidil           | Antianginal             | 1986- | 100 mg t.i.d.         | Long term | ~1% [86]                                                                                                                   | Yes |
| Chlorpromazine    | Antipsychotic           | 1954- | 75-300 mg o.d.        | Long term | Several cases of TdP documented [87]                                                                                       | Yes |
| Erythromycin i.v. | Antibiotic              | 1982- | 250-500 q.i.d         | 21 days   | Numerous cases documented after i.v. use [19;76]                                                                           | Yes |
| Flecainide        | Class Ic antiarrhythmic | 1982- | 100 mg b.i.d.         | Long term | Several reports of TdP [88;89; Ohki et al, 01] including a suicidal overdose [90]                                          | Yes |
| Halofantrine      | Antimalarial            | 1988- | 1.5 g per week        | 2 weeks   | Numerous reports of TdP [76]                                                                                               | Yes |
| Haloperidol       | Antipsychotic           | 1958- | 5-10 mg o.d.          | Long term | Numerous reports of TdP with oral and i.v. use [4;91]                                                                      | Yes |
| Lidoflazine       | Antianginal             | 1984- | 120 mg t.i.d.         | Long term | Reports of sudden death attributed to TdP [76]; TdP risk considered greater than quinidine [92]                            | No  |
| Maprotiline       | Antidepressant          | 1984- | 25-150 mg o.d./b.i.d. | Long term | Several reports of TdP [93;94;95;96] including suicidal overdose where thioridazine also present [97]                      | No  |
| Pentamidine       | Anti-protozoal          | 1988- | 4 mg/kg o.d.          | 14 days   | Numerous reports of TdP with oral and i.v. use [76]                                                                        | Yes |
| Pimozide          | Antipsychotic           | 1971- | 2-20 mg o.d.          | Long term | Numerous reports to CSM of arrhythmias and sudden death [19]; one published report of TdP following suicidal overdose [98] | Yes |
| Thioridazine      | Antipsychotic           | 1959- | 150-600 mg o.d.       | Long term | Highest risk of TdP amongst antipsychotics [4; Ray et al, 01]; restricted use.                                             | Yes |

|                              | Drug class/application                                 | Market span            | Recommended adult dosage | Typical duration of treatment | Association with TdP                                                                                                                              | TdP on label |
|------------------------------|--------------------------------------------------------|------------------------|--------------------------|-------------------------------|---------------------------------------------------------------------------------------------------------------------------------------------------|--------------|
| <b>CATEGORY 4</b>            |                                                        |                        |                          |                               |                                                                                                                                                   |              |
| Amantadine                   | AntiParkinsonian                                       | 1983-                  | 100 mg t.i.d.            | Long term                     | One case of TdP following suicidal overdose (2.5 g ingested) [99]                                                                                 | No           |
| Amitriptyline                | Antidepressant                                         | 1982-                  | 30-75 mg o.d.            | Long term                     | One case of TdP following suicidal overdose [100]                                                                                                 | Yes          |
| Chloral hydrate <sup>†</sup> | Sedative                                               | 1869-(now rarely used) | Max 2 g o.d.             | Variable                      | Isolated reports after accidental i.v. administration [101]                                                                                       | No           |
| Chloroquine <sup>†</sup>     | Antimalarial                                           | 1982-                  | 300 mg weekly            | Min 6 weeks                   | One report of TdP following self medication [102]                                                                                                 | No           |
| Ciprofloxacin                | Antibiotic                                             | 1986-                  | 250-750 b.d.             | 5 days                        | 2 reports of TdP: incidence 0.3 cases/10 million prescriptions [37]                                                                               | No           |
| Clarithromycin               | Antibiotic                                             | 1990-                  | 250-500 mg t.i.d.        | Up to 14 days                 | TdP in 2 patients with drug alone [103]; drug interactions leading to TdP [5]                                                                     | Yes          |
| Cocaine                      | Drug of abuse (originally used as a local anaesthetic) | 1884-                  | -                        | -                             | Isolated reports in patients with idiopathic long QT syndrome [104;105]                                                                           | N/A          |
| Desipramine                  | Antidepressant                                         | 1993-                  | 50 mg t.i.d./q.i.d.      | Long term                     | One case of TdP reported [106]                                                                                                                    | Yes          |
| Diphenhydramine              | Antihistamine                                          | 1945-                  | 25-50 mg o.d.            | Symptomatic                   | Two cases of TdP reported [40], yet no TdP after overdose [41]                                                                                    | No           |
| Domperidone                  | Prokinetic                                             | 1978-                  | 10-20 mg q.i.d.          | 12 weeks                      | TdP only reported with i.v. use: several cases documented [19]                                                                                    | No           |
| Doxepin                      | Antidepressant                                         | 1983-                  | 75 mg o.d.               | Long term                     | Two cases reported; one after therapeutic dose in a patient with resting arrhythmia [107], the other after suicidal overdose (6 g ingested) [108] | No           |
| Erythromycin p.o.            | Antibiotic                                             | 1982-                  | 250-500 q.i.d.           | 21 days                       | One case documented after oral administration [19;76]                                                                                             | Yes          |
| Fexofenadine                 | Antihistamine                                          | 1996-                  | 120-180 mg o.d.          | Seasonal                      | One report of TdP [109]                                                                                                                           | No           |
| Fluoxetine                   | Antidepressant                                         | 1986-                  | 20 mg o.d.               | Long term                     | One report of TdP [110]                                                                                                                           | Yes          |
| Furosemide                   | Diuretic                                               | 1970s                  | 20-40 mg o.d.            | Long term                     | Isolated reports secondary to diuretic-induced hypokalaemia [111]                                                                                 |              |
| Imipramine                   | Antidepressant                                         | 1982-                  | 10-100 mg b.i.d.         | Long term                     | Well documented proarrhythmic effects, but not of the TdP type [76]; one report of TdP after suicidal overdose [112]                              | No           |
| Ketanserin                   | Antihypertensive                                       | 1985-                  | 40 mg b.i.d.             | Long term                     | Isolated reports of TdP [76]                                                                                                                      | Yes          |
| Mexiletine                   | Class Ib antiarrhythmic                                | 1977-                  | 400-800 mg t.i.d./q.i.d. | Long term                     | One report of TdP [113]                                                                                                                           | No           |
| Mibefradil                   | Antihypertensive (calcium channel blocker)             | 1997-1998              | 50-100 mg o.d.           | Long term                     | One report of TdP [18]. Withdrawn after less than one year on the market due to drug interactions leading to TdP [5].                             | Yes          |
| Nifedipine                   | Antihypertensive/ antianginal                          | 1982-                  | 10-40 mg b.i.d.          | Long term                     | Two reports of TdP [42;43;44;45]                                                                                                                  |              |
| Papaverine                   | Antispasmodic                                          | 1982-                  | 40-120 mg o.d./t.i.d.    | Variable                      | Isolated reports of TdP after intracoronary arterial injection                                                                                    |              |

|                         | Drug class/application  | Market span | Recommended adult dosage                | Typical duration of treatment | Association with TdP                                                                                           | TdP on label |
|-------------------------|-------------------------|-------------|-----------------------------------------|-------------------------------|----------------------------------------------------------------------------------------------------------------|--------------|
| Perhexiline             | Antianginal             | 1970s-      | 50-100 mg b.i.d.                        | Long term                     | [114;115;116]<br>One report of TdP [117]                                                                       | No           |
| Probucol                | Antilipemic             | 1977-       | 500 mg b.i.d.                           | Long term                     | Isolated reports of TdP [76]                                                                                   | Yes          |
| Propafenone             | Class Ic antiarrhythmic | 1982-       | 300 mg t.i.d.                           | Long term                     | Isolated reports [118;119]                                                                                     |              |
| Sparfloxacin            | Antibiotic              | 1993-       | 400 mg loading dose then<br>200 mg o.d. | 10 days                       | Isolated reports of TdP [120]                                                                                  | Yes          |
| Spiramycin <sup>†</sup> | Antibiotic              | 1982-       | 1-2 g b.i.d.                            | Up to 4 weeks                 | One report of TdP when co-administered with mequitazine [121]                                                  | No           |
| Sultopride              | Antipsychotic           | 1984-       | 0.4-0.6 g o.d.                          | Long term                     | Two reports of TdP: one during standard therapy [122], the other after suicidal overdose (16 g ingested) [123] | Yes          |
| Tacrolimus              | Immunosuppressant       | 1993-       | 0.10-0.15 mg/kg/day (i.v.)              | Up to 6 months                | Two reports of TdP [124;125]                                                                                   | No           |
| Zimeldine               | Antidepressant          | 1980s-      | 200-300 mg o.d.                         | Variable                      | One report of TdP following suicidal overdose (~5-6g)[126]                                                     |              |

### CATEGORY 5

|                         |                                            |              |                       |                                |                    |     |
|-------------------------|--------------------------------------------|--------------|-----------------------|--------------------------------|--------------------|-----|
| Amlodipine              | Antihypertensive (calcium channel blocker) | 1990-        | 5-10 mg o.d.          | Long term                      | No reports of TdP. |     |
| Captopril <sup>†</sup>  | Antihypertensive (ACE inhibitor)           | Early 1980s- | 50 mg t.i.d.          | Long term                      | No reports of TdP. |     |
| Cetirizine              | Antihistamine                              | 1987-        | 10 mg o.d.            | Seasonal                       | No reports of TdP. | No  |
| Chlorcyclizine          | Antihistamine                              | Early 1950s- | 50-100 mg o.d./b.i.d. | Short term                     | No reports of TdP. |     |
| Chlorpheniramine        | Antihistamine                              | 1982-        | 4 mg t.i.d.           | Seasonal                       | No reports of TdP. | No  |
| Cibenzoline             | Class Ic antiarrhythmic                    | 1985-        | 260-390 mg o.d.       | Long term                      | No reports of TdP. |     |
| Clemastine              | Antihistamine                              | 1988-        | 1 mg b.d.             | Seasonal                       | No reports of TdP. | No  |
| Cyproheptadine          | Antihistamine                              | 1982-        | 4 mg t.i.d./q.i.d.    | Seasonal /Long term (migraine) | No reports of TdP. | No  |
| Diltiazem               | Antihypertensive                           | 1982-        | 60 mg t.i.d.          | Long term                      | No reports of TdP. |     |
| Doxorubicin             | Anticancer                                 | 1982-        | 450mg/m <sup>2</sup>  | Total cumulative               | No reports of TdP. |     |
| Ebastine                | Antihistamine                              | 1990-        | 10 mg o.d.            | Seasonal/Long term             | No reports of TdP. | No  |
| Emetine <sup>†</sup>    | Amoebicide                                 | 1829-        | Max 60 mg o.d.        | Max 10 days                    | No reports of TdP. |     |
| Encainide               | Class Ic antiarrhythmic                    | 1980s-1991   | 25-50 mg t.i.d.       | Long term                      | No reports of TdP. |     |
| Epinastine <sup>†</sup> | Antihistamine                              | 1994-        | 5-20 mg o.d.          | Seasonal                       | No reports of TdP. | No  |
| Erythromycylamine       | Antibiotic                                 | ?            | 500 mg o.d.           | Short term                     | No reports of TdP. |     |
| Felbamate <sup>†</sup>  | Antiepileptic                              | 1993-        | Max 3600 mg/day       | Long term                      | No reports of TdP. | Yes |

|                           | <b>Drug class/application</b>                        | <b>Market span</b> | <b>Recommended adult dosage</b>                                     | <b>Typical duration of treatment</b> | <b>Association with TdP</b>                                                                                                                              | <b>TdP on label</b> |
|---------------------------|------------------------------------------------------|--------------------|---------------------------------------------------------------------|--------------------------------------|----------------------------------------------------------------------------------------------------------------------------------------------------------|---------------------|
| Foscarnet <sup>†</sup>    | Antiviral                                            | 1986-              | 60 mg/kg o.d.                                                       | 2 – 3 weeks                          | No reports of TdP.                                                                                                                                       | No                  |
| Fosphenytoin <sup>†</sup> | Antiepileptic                                        | 1996-              | 50-100 mg/min i.v.                                                  | Acute                                | No reports of TdP.                                                                                                                                       | No                  |
| Ganciclovir <sup>†</sup>  | Antiviral                                            | 1988-              | 1 g t.i.d.                                                          | Long term                            | No reports of TdP.                                                                                                                                       |                     |
| Hydroxyzine               | Antihistamine                                        | 1970s-             | 25-100 mg t.i.d./q.i.d                                              | Variable                             | No reports of TdP.                                                                                                                                       |                     |
| Ketoconazole              | Antifungal                                           | 1982-              | 200 mg o.d.                                                         | Up to 6 months                       | No reports of TdP when sole medication. CYP3A4 inhibitor: TdP when used in conjunction with other drugs in categories 1-3 above (e.g. terfenadine) [127] | No                  |
| Loratadine                | Antihistamine                                        | 1988-              | 10 mg o.d.                                                          | Seasonal                             | No reports of TdP.                                                                                                                                       | No                  |
| Mefloquine                | Antimalarial                                         | 1970s-             | 1250 mg single oral dose (acute therapy); 250 mg/week (prophylaxis) | > 5 weeks                            | No reports of TdP                                                                                                                                        |                     |
| Melperone <sup>†</sup>    | Antipsychotic                                        | 1983-              | 25-100 mg t.i.d./q.i.d.                                             | Long term                            | No reports of TdP.                                                                                                                                       |                     |
| Mesoridazine <sup>†</sup> | Antipsychotic                                        | 1970-              | 50 mg t.i.d.                                                        | Long term                            | No reports of TdP; ECG abnormalities [76]                                                                                                                | Yes                 |
| Mizolastine               | Antihistamine                                        | 1998-              | 10 mg o.d.                                                          | Seasonal/long term                   | No reports of TdP.                                                                                                                                       | Yes                 |
| Nitrendipine              | Antihypertensive                                     | 1985-              | 20 mg o.d.                                                          | Long term                            | No reports of TdP.                                                                                                                                       |                     |
| Olanzapine                | Antipsychotic                                        | 1996-              | 10 mg o.d.                                                          | Long term                            | No reports of TdP.                                                                                                                                       | Yes                 |
| Phenytoin                 | Antiepileptic                                        | 1938-              | 300-400 mg o.d.                                                     | Long term                            | No reports of TdP.                                                                                                                                       |                     |
| Pyrilamine                | Antihistamine                                        | 1945-              | 100 mg t.i.d.                                                       | Seasonal                             | No reports of TdP.                                                                                                                                       | No                  |
| Quetiapine                | Antipsychotic                                        | 1997-              | 150-225 mg b.i.d.                                                   | Long term                            | No reports of TdP.                                                                                                                                       | No                  |
| Risperidone               | Antipsychotic                                        | 1993-              | 3 mg b.i.d.                                                         | Long term                            | No reports of TdP. One report of sudden death without TdP [128]                                                                                          | Yes                 |
| Sumatriptan <sup>†</sup>  | Antimigraine                                         | 1991-              | 50-100 mg                                                           | Variable                             | No reports of TdP.                                                                                                                                       | No                  |
| Tamoxifen                 | Anticancer                                           | 1982-              | 10-20 mg b.i.d.                                                     | Variable                             | No reports of TdP.                                                                                                                                       | No                  |
| Tocainide                 | Class Ib antiarrhythmic                              | 1982-              | 400-800 mg t.i.d.                                                   | Long term                            | No reports of TdP.                                                                                                                                       |                     |
| Verapamil                 | Class IV antiarrhythmic/antihypertensive/antianginal | 1982-              | 80-160 mg b.i.d./t.i.d.                                             | Long term                            | No reports of TdP.                                                                                                                                       | No                  |
| Zolmitriptan <sup>†</sup> | Antimigraine                                         | 1997-              | Max 10 mg o.d.                                                      | Variable                             | No reports of TdP.                                                                                                                                       | No                  |

Drugs are listed in alphabetical order within each category; within Category 1, Class Ia antiarrhythmics are listed alphabetically before Class III antiarrhythmics. Market span dates are approximate, and are for guidance only. Data on doses and dosing regimens obtained from BNF and PDR unless otherwise indicated. ‘TdP on label’ refers to either Europe or US regulatory territories. <sup>†</sup>Drug does not appear in table 2, due to absence of any in vitro, in vivo or human electrophysiology data. For description of categories refer to text.



| Drug                | Mol Wt | % ppb (human) | ETPC ng/ml (range) | ETPC unbound nM (range) | hERG (or I <sub>Kr</sub> ) IC <sub>50</sub> μM (range) | 10-20% increase APD <sub>90</sub> μM (range)                        | 10-20% increase in vivo QTc mg/kg - (range) | 10-20% increase in vivo QTc μM unbound (range) | 10-20% increase human QTc mg/kg (low) or [μM] unbound (range)              | References                                                 |
|---------------------|--------|---------------|--------------------|-------------------------|--------------------------------------------------------|---------------------------------------------------------------------|---------------------------------------------|------------------------------------------------|----------------------------------------------------------------------------|------------------------------------------------------------|
| <b>CATEGORY 1</b>   |        |               |                    |                         |                                                        |                                                                     |                                             |                                                |                                                                            |                                                            |
| <b>Ajmaline</b>     | 326.4  | 38            | 34                 | 65                      |                                                        | 3<br>decreased in PF,<br>increased in atrial and<br>VM [129]        |                                             |                                                | 1<br>iv increase in QT<br>and TdP                                          | [19;130;131;129;132]                                       |
| <b>Disopyramide</b> | 339.5  | 58            | 200 - 600          | 247 - 742               | 1.8                                                    | 5 - 40<br>dog PF; rabbit PF:<br>decrease at 10-20μM<br>[136]        | 15 - 30                                     |                                                | 2 - 7.5<br>iv                                                              | [81;19;133;134;135;136;<br>137;138;139;140;141]            |
| <b>Procainamide</b> | 235.3  | 15            | 7500 - 15000       | 27093 - 54186           | 310 - 380                                              | AT-1 (22°C)<br>rabbit LH; no effect<br>in dog PF at 320 μM<br>[142] | 100                                         |                                                | [18 μM]<br><br>(total = 24 μM [5.6 [19;76;143;144;145;146]<br>mg/ml])      |                                                            |
| <b>Quinidine</b>    | 324.4  | 85            | 2000 - 7000        | 924 - 3237              | 0.3 - 1<br>Ltk (22°C)                                  | 1 - 10<br>GP VM                                                     | 4 - 12.5                                    | 0.3 - 0.7<br>(total = 2 - 4.6<br>μM)           | [0.56 - 2.3 μM]<br>(totals = 3.7 μM<br>[1.2 mg/ml] and 15<br>μM [5 mg/ml]) | [19;147;144;148;49;149;<br>150;151;152;153;154;155]        |
| <b>Almokalant</b>   |        | 20            |                    | 70 - 150                | 0.05                                                   | 0.03 - 0.1                                                          | 0.04 - 0.35                                 | 0.08 - 0.2 μM<br>(total = 0.1 - 0.25<br>μM)    | [40 nM]<br>(total = 50 nM)                                                 | [156;157;158;159;160;153<br>;161;162]                      |
| <b>Amiodarone</b>   | 645.3  | 99.98         | 500 - 2500         | 0.1 - 0.5               | 1 - 9.8<br>AT-1 (22°C),<br>Ltk (22°C),<br>rabbit VM    | 5 - 59                                                              | 10 - 400                                    | 0.0003 - 0.0006<br>(total = 1.5 - 2.9<br>μM)   |                                                                            | [81;20;163;164;144;28;<br>165;166;167;168;169;170;<br>168] |
| <b>Azimilide</b>    | 457.9  | 94            | 305 - 534          | 40 - 70                 | 0.1 - 0.4                                              | 0.1 - 3                                                             | 3 - 30                                      | 0.17 - 0.33<br>(total = 2.8 - 5.5<br>μM)       |                                                                            | [19;171;172;173;174;175]                                   |
| <b>Dofetilide</b>   | 441.6  | 65            | 0.5 - 2.5          | 0.4 - 2.0               | 0.005 - 10<br>I <sub>Kr</sub> GP myocytes,             | 0.003 - 10<br>GP PM                                                 | 0.01 - 0.9                                  | 0.03<br>(total = 0.09 μM)                      | [0.001 - 0.003 μM]<br>(totals = 1.73 and                                   | [19;176;177;178;179;180;                                   |

| Drug                 | Mol Wt | % ppb (human) | ETPC ng/ml (range) | ETPC unbound nM (range) | hERG (or I <sub>Kr</sub> ) IC <sub>50</sub> μM (range) | 10-20% increase APD <sub>90</sub> μM (range)   | 10-20% increase in vivo QTc mg/kg - (range) | 10-20% increase in vivo QTc μM unbound (range) | 10-20% increase human QTc mg/kg (low) or [μM] unbound (range) | References                                                       |
|----------------------|--------|---------------|--------------------|-------------------------|--------------------------------------------------------|------------------------------------------------|---------------------------------------------|------------------------------------------------|---------------------------------------------------------------|------------------------------------------------------------------|
|                      |        |               |                    |                         | GP myocytes                                            |                                                |                                             |                                                | 3.63 mg/L]                                                    | 181;158;182;159;183;184;185;186]                                 |
| <b>Ibutilide</b>     | 384.6  | 40            | 0.5 - 90           | 0.7 - 140               | 0.01 - 0.02                                            | 0.01 - 0.1<br>GP VM                            | 0.01 - 0.3                                  | 0.02 - 0.07<br>(total = 0.04 - 0.12 μM)        | 0.015 - 0.025<br>iv                                           | [187;19;188;189;143;190;191;192;193;194;195;196;197]             |
| <b>Sematilide</b>    | 312.2  | 4             | 653 - 1447         | 2008 - 4449             | 25 - 50                                                | 10                                             | 0.7 - 4.1                                   | 11<br>(total = 11 μM)                          | [3.4 μM]<br>(total = 3.6 μM [1.1 mg/ml])                      | [76;79;198;199;200;201;202;184]                                  |
| <b>D,L-sotalol</b>   | 271.5  | 0             | 500 - 4000         | 1842 - 14733            | 74 - 169<br>GP PM                                      | 0.5 - 100<br>dog PF; GP VM                     | 1 - 34                                      | 3 - 23                                         | 4                                                             | [19;203;76;204;205;136;206;148;207;208;209;210]                  |
| <b>Tedisamil</b>     |        | 96            |                    | 80                      | 2.5                                                    | 1<br>human PF, 29%                             | 100 - 1000                                  |                                                | 0.3 - 1.4<br>iv 0.3; po 1.4                                   | [211;212;213;214;215;216]                                        |
| <b>CATEGORY 2</b>    |        |               |                    |                         |                                                        |                                                |                                             |                                                |                                                               |                                                                  |
| <b>Astemizole</b>    | 458.6  | 96.7          | 2.7 - 3.6          | 0.20 - 0.26             | 0.0009 - 0.026<br>HEK<br>HEK; GP myocytes]             | 0.0003 - 0.3<br>17.5% GP VM 1Hz; 10% rabbit PF | 1<br>anaes. dog                             | 0.013<br>(total = 0.4 μM)                      | 0.2<br>po <i>no effect</i> in children                        | [19;217;218;219;220;221;208]                                     |
| <b>Cisapride</b>     | 466.0  | 98            | 60                 | 2.6 - 4.9               | 0.002 - 0.045<br>HEK RT; 37°C                          | 0.01 - 3<br>rabbit PF 1 Hz                     | 0.1 - 1.4<br>dog pentobarb                  | 0.0002 - 0.003<br>(total = 0.008 - 0.148 μM)   | 0.7 - 1.3                                                     | [19;222;223;224;225;226;227;228;229;230;231;232;233;234;235;236] |
| <b>Droperidol</b>    | 379.4  |               | 60                 |                         | 0.028 - 0.032<br>GP VM 30°C; HEK RT                    | 0.01 - 1<br>GP VM                              |                                             |                                                | 0.25<br>iv                                                    | [81;76;237;238;239;240]                                          |
| <b>Grepafloxacin</b> | 359.4  | 50            | 1200 - 1500        | 1669 - 2087             | 27 - 104<br>CHO RT; AT-1                               | 14 - 26<br>dog PF                              | 2<br>2mg/kg/min rabbit pentobarb            |                                                |                                                               | [187;76;241;242;243;230;244]                                     |
| <b>Prenylamine</b>   | 329.6  | n/a           | 23                 |                         |                                                        | 20                                             | 3                                           |                                                | 2.6                                                           |                                                                  |

| Drug                       | Mol Wt | % ppb (human) | ETPC ng/ml (range) | ETPC unbound nM (range)                                         | hERG (or I <sub>Kr</sub> ) IC <sub>50</sub> μM (range) | 10-20% increase APD <sub>90</sub> μM (range)                                                                     | 10-20% increase in vivo QTc mg/kg - (range) | 10-20% increase in vivo QTc μM unbound (range)                   | 10-20% increase human QTc mg/kg (low) or [μM] unbound (range) | References                                               |
|----------------------------|--------|---------------|--------------------|-----------------------------------------------------------------|--------------------------------------------------------|------------------------------------------------------------------------------------------------------------------|---------------------------------------------|------------------------------------------------------------------|---------------------------------------------------------------|----------------------------------------------------------|
| <b>Sertindole</b>          | 440.9  | 99.5          | 2 - 140            | 0.02 - 1.59                                                     | 0.014 - 0.062<br>HEK293 2 s                            | GP VM<br>0.3 - 0.45<br>2 s stim, dog PF                                                                          | [iv]                                        | 0.0025 - 0.1<br>(total = 0.5 - 20 μM)                            | 0.25 - 0.34<br>po                                             | [19;245;246;247]<br>[19;203;179;248;230;249;250;251]     |
| <b>Terfenadine</b>         | 471.7  | 97            | 1.5 - 4.5          | 0.10 - 0.29<br>1.2-9 nM in presence of P450 inhibitor [231;252] | 0.02 - 0.20<br>HEK 37°C; Human VM                      | 0.01 - 10<br>GP myocytes; rabbit PF; <i>no effect</i> in dog PF at 10 μM [230;253]                               | 100<br>Dog pentobarb                        | 0.00015 - 0.0003<br>(totals = 5 & 10 nM, cyno monkey; 11nM, dog) | [0.0002 μM]<br>(total = 8nM)                                  | [81;19;76;232;232;254;226;2;13;220;255;256;257]          |
| <b>Terodiline</b>          | 281.4  | 92            |                    | 8 - 12                                                          | 0.004 - 0.7<br>GP VM                                   | 0.01 - 10                                                                                                        | 3 - 10                                      |                                                                  | [21 - 78 μM]<br>(totals = 140 and 521μM)                      | [19;225;258;259;260;261;262;263;230;231;232;264;265;266] |
| <b>CATEGORY 3</b>          |        |               |                    |                                                                 |                                                        |                                                                                                                  |                                             |                                                                  |                                                               |                                                          |
| <b>Aprindine</b>           | 322.4  | 90            | 770                | 239                                                             | 0.23<br>COS RT                                         |                                                                                                                  |                                             |                                                                  | 100<br>po                                                     | [19;267;268;269]                                         |
| <b>Bepridil</b>            | 384.5  | 99            | 400 - 1268         | 10 - 33                                                         | 0.6 - 13<br>COS; GP myocytes                           | 10 - 26<br>dog PF; also <i>decreased</i> by 14% dog PF [270]                                                     |                                             |                                                                  | 3 - 5.7<br>iv 8%; po 5%                                       | [19;76;271;29;272;273;274]                               |
| <b>Chlorpromazine</b>      | 318.9  | 96.5          | 30 - 350           | 3 - 38                                                          |                                                        | 10<br>no effect [275]                                                                                            |                                             |                                                                  |                                                               | [19;20]                                                  |
| <b>Erythromycin (i.v.)</b> | 733.9  | 75            | 8500 - 25000       | 2895 - 8516                                                     | 72.2-100<br>HEK 35°C; GP VM 37°C                       | 27 - 136<br>dog PF                                                                                               | 40<br>iv anaesthetised dogs                 |                                                                  | 18 - 83<br>iv                                                 | [81;19;276;46;308;277;278;230;279]                       |
| <b>Flecainide</b>          | 414.4  | 61            | 400 - 800          | 376 - 753                                                       | 3.91<br>HEK 37°C                                       | 2.4 - 24<br>Mixed reports - <i>decreased</i> : PF [280], 20 μM [281]; <i>decreased</i> GP PM 0.3Hz; decreased at |                                             |                                                                  |                                                               | [19;20;284]                                              |

| Drug                 | Mol Wt | % ppb (human) | ETPC ng/ml (range)      | ETPC unbound nM (range)                                               | hERG (or I <sub>Kr</sub> ) IC <sub>50</sub> μM (range)               | 10-20% increase APD <sub>90</sub> μM (range)                                        | 10-20% increase in vivo QTc mg/kg - (range) | 10-20% increase in vivo QTc μM unbound (range) | 10-20% increase human QTc mg/kg (low) or [μM] unbound (range)                               | References             |
|----------------------|--------|---------------|-------------------------|-----------------------------------------------------------------------|----------------------------------------------------------------------|-------------------------------------------------------------------------------------|---------------------------------------------|------------------------------------------------|---------------------------------------------------------------------------------------------|------------------------|
| <b>Halofantrine</b>  | 500.4  | n/a           | 143 - 246               |                                                                       | 0.197<br>HEK 37°C;<br>CHO                                            | 30 μM [282];<br><i>increased: (VentMF)</i><br>[280]; increased up to<br>10 μM [283] | 30<br>31% increase                          |                                                | [0.2 - 0.5 μM]<br>NB: Total<br>concentration                                                | [19;285;286;287;288]   |
| <b>Haloperidol</b>   | 375.9  | 92            | 6 - 17                  | 1.2 - 3.6                                                             | 0.027<br>HEK 37°C                                                    |                                                                                     |                                             |                                                | 3<br>po ~50%                                                                                | [81;19;289;62;290]     |
| <b>Lidoflazine</b>   | 491.6  |               |                         |                                                                       |                                                                      | 5<br>dog PF                                                                         |                                             |                                                | 5.1<br>po                                                                                   | [81;272;291]           |
| <b>Maprotiline</b>   | 277.4  | 88            | 15 - 300                | 6 - 130                                                               |                                                                      | 10 to 100<br>PM                                                                     |                                             |                                                |                                                                                             | [19;203;292;293]       |
| <b>Pentamidine</b>   | 280.6  | n/a           | 209 - 612<br>[IM], [IV] |                                                                       |                                                                      |                                                                                     |                                             |                                                | 4 - 5<br><i>iv no effect</i> [294] , [19;76]<br><i>inhalation route no<br/>effect</i> [295] |                        |
| <b>Pimozide</b>      | 461.5  | 99            | n/a - n/a               | 0.09 - 0.43<br>1 nM in<br>presence of<br>CYP3A4<br>inhibitor<br>[296] | 0.015 - 0.055<br>I <sub>Kr</sub> GP myocytes;<br>HEK 37°C;<br>CHO RT |                                                                                     |                                             |                                                | 0.3<br>po 5%                                                                                | [19;20;297;62;298;299] |
| <b>Thioridazine</b>  | 370.6  | 45            | 140 - 660               | 208 - 979                                                             | 0.033 - 1.25<br>HEK 37°C; tsA-<br>201 RT                             | 10<br>7% increase PF                                                                |                                             |                                                | 0.7<br>po ~20-30%                                                                           | [19;76;62;300;238;301] |
| <b>CATEGORY 4</b>    |        |               |                         |                                                                       |                                                                      |                                                                                     |                                             |                                                |                                                                                             |                        |
| <b>Amantadine</b>    | 151.2  | 63            | 110 - 302               | 269 - 739                                                             |                                                                      |                                                                                     |                                             |                                                | 35.7<br>~50% increase<br>after 36 hours                                                     | [19;302;99]            |
| <b>Amitriptyline</b> | 277.4  | 94.8          | 60 - 220                | 11 - 41                                                               | 4.66                                                                 | 1 - 10                                                                              | 2                                           |                                                | 2.9                                                                                         |                        |

| Drug                       | Mol Wt | % ppb (human) | ETPC ng/ml (range) | ETPC unbound nM (range) | hERG (or I <sub>Kr</sub> ) IC <sub>50</sub> μM (range) | 10-20% increase APD <sub>90</sub> μM (range)                       | 10-20% increase in vivo QTc mg/kg - (range) | 10-20% increase in vivo QTc μM unbound (range) | 10-20% increase human QTc mg/kg (low) or [μM] unbound (range) | References                           |
|----------------------------|--------|---------------|--------------------|-------------------------|--------------------------------------------------------|--------------------------------------------------------------------|---------------------------------------------|------------------------------------------------|---------------------------------------------------------------|--------------------------------------|
|                            |        |               |                    |                         | XO                                                     | <i>decreased</i> in dog PF [303] , <i>decreased</i> in GP PF [275] |                                             |                                                | po 4%                                                         | [19;20;304;305;306]                  |
| <b>Ciprofloxacin</b>       | 331.4  | 30            | 1140 - 2500        | 2408 - 5281             | >100 - 966<br>CHO 23°C;<br>CHO RT                      | 200                                                                |                                             |                                                | 5.7<br><i>no mention of effect.</i> [307]                     | [285;76;241;242;243]                 |
| <b>Clarithromycin</b>      | 748    | 80            | 1000 - 4510        | 267 - 1206              | 32.9<br>HEK 37°C                                       |                                                                    |                                             |                                                | dose?<br><i>no effect</i>                                     | [19;203;308;309;310;311]             |
| <b>Cocaine</b>             | 303.4  | 91            | 55 - 144           | 16 - 43                 | 7.2                                                    | 3 - 30<br><i>decreased</i> [312]                                   | 4 - 5                                       | 1.8 - 2<br>(total = 20 - 23 μM)                |                                                               | [19;313;314;315;316;317;318;319;312] |
| <b>Desipramine</b>         | 266.3  | 82            | 40 - 160           | 27 - 108                | 1.39<br>HEK 36°C                                       | 1<br><i>decreased</i> in dog PF [320]                              |                                             |                                                | 2.9<br>po 6%                                                  | [19;20;62;306]                       |
| <b>Diphenhydramine</b>     | 255.4  | 78            | 25 - 40            | 22 - 34                 | 30                                                     | 2.5 - 10<br>GP isolated hearts                                     |                                             |                                                | 1.4 - 7.1                                                     | [19;20;321;2;322;41]                 |
| <b>Domperidone</b>         | 425.9  | 90            | 21 - 140           | 5 - 19                  | 0.16                                                   | 0.1                                                                |                                             |                                                |                                                               | [81;19;323]                          |
| <b>Doxepin</b>             | 279.3  | 76            | 30 - 150           | 26 - 129                |                                                        | 100<br><i>decreased</i> in dog PF [320]                            | 1 mg/kg per min                             | 9.6<br>(total = 40 μM)                         | 1.6 - 2.4<br>po 5%                                            | [19;203;20;324;325;326]              |
| <b>Erythromycin (p.o.)</b> | 733.9  | 75            | 300 - 500          | 102 - 170               | 72.2-100                                               | 37 - 136                                                           |                                             |                                                | 18 - 83                                                       |                                      |
| <b>Fexofenadine</b>        | 501.6  | 65            | 494                | 345                     | HEK 35°C; GP VM 37°C<br>5 - 23<br>cat VM; COS RT       | dog PF                                                             |                                             |                                                |                                                               | [81;19;46;308;230;278;279]           |
| <b>Fluoxetine</b>          | 309.3  | 94            | 45 - 150           | 9 - 29                  | 3.1<br>XO                                              | 58<br><i>decreased</i> [230]                                       |                                             |                                                | 0.5<br>po <i>no effect</i>                                    | [81;20;19;330;326]                   |

| Drug                | Mol Wt | % ppb (human) | ETPC ng/ml (range) | ETPC unbound nM (range) | hERG (or I <sub>Kr</sub> ) IC <sub>50</sub> μM (range) | 10-20% increase APD <sub>90</sub> μM (range)                                             | 10-20% increase in vivo QTc mg/kg - (range) | 10-20% increase in vivo QTc μM unbound (range) | 10-20% increase human QTc mg/kg (low) or [μM] unbound (range)          | References                          |
|---------------------|--------|---------------|--------------------|-------------------------|--------------------------------------------------------|------------------------------------------------------------------------------------------|---------------------------------------------|------------------------------------------------|------------------------------------------------------------------------|-------------------------------------|
| <b>Imipramine</b>   | 280.4  | 90.1          | 100 - 300          | 35 - 106                | 3.4                                                    | 1<br><i>decreased dog PF</i><br>[320]                                                    |                                             |                                                | 2.1<br>po <1% increase                                                 | [81;20;331;332]                     |
| <b>Ketanserin</b>   | 395.4  | 95            | 40 - 140           | 5 - 18                  |                                                        | 0.01 - 1<br><i>increased 0.01 to 3,</i><br><i>decreased at 10 μM</i>                     |                                             |                                                | 0.2 - 0.6<br>0.57 mg/kg po 5%<br>increase; 0.2 mg/kg<br>iv 6% increase | [81;333;334;335;336;337]            |
| <b>Mexiletine</b>   | 179.2  | 63            | 700 - 2000         | 1445 - 4129             |                                                        | 10<br><i>decreased dog PF</i>                                                            |                                             |                                                | 1.43<br>po qid TdP but no<br>increase in QT                            | [19;20;338;113]                     |
| <b>Mibefradil</b>   | 495.6  | 99            | 300 - 600          | 6 - 12                  | 0.35 - 1.43                                            | 0.03 - 1<br><i>decreased</i> [339]                                                       | 30                                          | 0.034<br>(total = 3.43 μM<br>[1700ng/mL])      |                                                                        | [19;285;340;30;143;341]             |
| <b>Nifedipine</b>   | 346.3  | 96            | 27 - 67            | 3.1 - 7.7               | 275                                                    | 2.5 - 5<br><i>decreased at 2.5 μM</i><br>[342]; <i>increased at 5</i><br><i>μM</i> [343] |                                             |                                                |                                                                        | [81;20;344]                         |
| <b>Papaverine</b>   | 339.4  | 90            | 201 - 271          | 59 - 80                 |                                                        |                                                                                          | 6 - 21 mg<br>intracoronary<br>anaes dog     |                                                | 6 mg - 12 mg<br>intracoronary                                          | [19;345;346;347]                    |
| <b>Perhexiline</b>  | 277.6  |               | 150 - 660          | 540 - 2378              | 7.8<br>CHO-K1, RT                                      |                                                                                          | <i>no effect</i>                            |                                                | 1.43<br>po 20-30%<br>increase & TdP                                    | [19;327;348;349;117]                |
| <b>Probucol</b>     | 516.8  | n/a           | N/a                |                         |                                                        |                                                                                          |                                             |                                                | 7.1                                                                    | [19;350]                            |
| <b>Propafenone</b>  | 341.4  | 95            | 176 - 1648         | 26 - 241                | 0.44<br>HEK293 37°C                                    | 1<br>rabbit LH                                                                           |                                             |                                                | 6.4<br><i>no effect</i>                                                | [19;76;284;145;119;351]             |
| <b>Sparfloxacin</b> | 392.4  | 45            | 140 - 1260         | 196 - 1766              | 0.23 - 34.4<br>I <sub>Kr</sub> AT-1; CHO               | 9 - 12<br>dog PF                                                                         | 3<br>3mg/kg/10min iv<br>dog halothane       | 6.3<br>(total = 11.4 μM)                       | 5.7 mg/kg<br>[3.0 μM]<br>(total = 5.4 μM)                              | [19;76;352;244;241;242;243;353;354] |
| <b>Sultopride</b>   | 354.5  |               | 726 - 1274         | 2048 - 3594             |                                                        | 3                                                                                        |                                             |                                                |                                                                        |                                     |

| Drug                    | Mol Wt | % ppb (human) | ETPC ng/ml (range) | ETPC unbound nM (range) | hERG (or I <sub>Kr</sub> ) IC <sub>50</sub> μM (range)  | 10-20% increase APD <sub>90</sub> μM (range) | 10-20% increase in vivo QTc mg/kg - (range) | 10-20% increase in vivo QTc μM unbound (range) | 10-20% increase human QTc mg/kg (low) or [μM] unbound (range) | References                           |
|-------------------------|--------|---------------|--------------------|-------------------------|---------------------------------------------------------|----------------------------------------------|---------------------------------------------|------------------------------------------------|---------------------------------------------------------------|--------------------------------------|
| <b>Tacrolimus</b>       | 822    | 99            | 7 – 20             | 0.09 - 0.24             |                                                         | 5<br>(67% increase)                          |                                             | 0.003<br>(total = 0.3 μM [260ng/mL])           | 0.04<br>iv 29% increase                                       | [81;19;238]<br>[19;76;355;356;124]   |
| <b>Zimeldine</b>        | 408.2  |               |                    |                         |                                                         |                                              |                                             |                                                | 71<br>overdose, 100% increase in QTtop                        | [76;126]                             |
| <b>CATEGORY 5</b>       |        |               |                    |                         |                                                         |                                              |                                             |                                                |                                                               |                                      |
| <b>Amlodipine</b>       | 408.9  | 93            | 2 – 10             | 0.34 - 1.75             |                                                         |                                              |                                             |                                                |                                                               | [76;327;357]                         |
| <b>Cetirizine</b>       | 388.8  | 93            | 311                | 56                      | 108 - 300<br>rabbit VM<br>37°C;COS                      |                                              | 5<br><i>no effect</i> dog<br>halothane      |                                                |                                                               | [81;327;358;329;208]                 |
| <b>Chlorcyclizine</b>   | 337.3  |               |                    |                         |                                                         | 10<br>(increase in QT cat<br>LH)             |                                             |                                                |                                                               | [81;359]                             |
| <b>Chlorpheniramine</b> | 319.9  | 70            | 2 - 12             | 2 - 11                  | 1.6<br>GP myocytes                                      | 5<br>(cat LH)                                |                                             |                                                |                                                               | [19;76;220;359;360]                  |
| <b>Cibenzoline</b>      | 262.4  | 55            | 293 - 569          | 502 - 976               | 23<br>IC <sub>50</sub> for I <sub>K</sub> as a<br>whole | decreased/mixed<br>effects/no effect         |                                             |                                                | [1.23 μM]<br>~5% increase<br>(total = 2.74 μM<br>[720 ng/ml]) | [81;361;362;363;364;365;<br>366;367] |
| <b>Clemastine</b>       | 344    |               | 0.45 - 1.61        | 1.3 - 4.7               |                                                         | 1<br>(increase in QT cat<br>LH)              |                                             |                                                |                                                               | [19;368;359]                         |
| <b>Cyproheptadine</b>   | 287.4  |               |                    |                         |                                                         | 10<br>(increase in QT cat<br>LH)             |                                             |                                                |                                                               | [19;359]                             |
| <b>Diltiazem</b>        | 414.5  | 78            | 100 - 229          | 53 - 122                | 10 – 17.3<br>COS 22°C; HEK                              | 10<br><i>decreased</i> GP PM                 |                                             |                                                |                                                               | [19;20;285;271;369;370]              |





| Drug         | Mol Wt | % ppb (human) | ETPC ng/ml (range) | ETPC unbound nM (range) | hERG (or I <sub>Kr</sub> ) IC <sub>50</sub> μM (range) | 10-20% increase APD <sub>90</sub> μM (range)                                     | 10-20% increase in vivo QTc mg/kg - (range) | 10-20% increase in vivo QTc μM unbound (range) | 10-20% increase human QTc mg/kg (low) or [μM] unbound (range) | References              |
|--------------|--------|---------------|--------------------|-------------------------|--------------------------------------------------------|----------------------------------------------------------------------------------|---------------------------------------------|------------------------------------------------|---------------------------------------------------------------|-------------------------|
| Nitrendipine | 360.4  | 98            | 2 – 54             | 0.11 - 3.02             | 10 - 50<br>HEK RT; COS<br>22°C                         |                                                                                  |                                             |                                                |                                                               | [19;76;391;392;271;369] |
| Olanzapine   | 312.4  | 93            | 8 - 23             | 1.8 - 5.2               | 0.231<br>HEK 36°C                                      |                                                                                  |                                             |                                                |                                                               | [19;76;393;394;62]      |
| Phenytoin    | 252.3  | 89            | 10000              | 4360                    | 100<br>(Cell type unknown)                             |                                                                                  |                                             |                                                |                                                               | [81;20;395]             |
| Pyrilamine   | 285.3  |               |                    |                         | 1.1<br>GP myocytes                                     |                                                                                  | 3<br>iv no effect                           |                                                |                                                               | [19;220]                |
| Quetiapine   | 383.5  | 83            | 22 – 74            | 10 – 33                 |                                                        |                                                                                  |                                             |                                                | [0.43 μM]<br>no effect                                        | [187;203;396;397]       |
| Risperidone  | 410.5  | 88            | 2.1 - 6.2          | 0.61 - 1.81             | 0.15<br>HEK 37°C                                       |                                                                                  |                                             |                                                | 0.03<br>~20% increase in one patient, during cardiac arrest   | [19;62;128]             |
| Tamoxifen    | 371.6  | 98.8          | 35 - 654           | 1 - 21                  | 1 - 3.3                                                | 3.3<br>no effect                                                                 |                                             |                                                | 80mg/square metre                                             | [19;398;399;400]        |
| Tocainide    | 192.2  | 10            | 300 - 1000         | 1405 – 4683             |                                                        |                                                                                  |                                             |                                                |                                                               | [19;20]                 |
| Verapamil    | 491.1  | 90            | 125 - 400          | 25 - 81                 | 0.14 - 0.83                                            | 1 - 10<br>increased in dog PF [401]; GP VM [402]; decreased in GP myocytes [339] | 0.03 - 0.3<br>iv no effect                  |                                                |                                                               | [81;20;19;369;30;403]   |

For the human QT data, doses in the source publications have generally been reported in ‘mg’; these have been converted to ‘mg/kg’ by assuming a body weight of 70 kg. Also in this column, any information on plasma concentrations (unbound) are indicated in square brackets. For both the human and the in vivo (animal) data, the total concentrations are indicated in the comments, as these are the data that appeared in the source references. In order to simplify the table, references to data sources for each drug have been collated into a single column; it is generally possible to ascertain from the titles of the publications as to which data have been sourced from which publication. Where there are complex effects (e.g. biphasic effects; different effects in different tissues; conflicting reports) the references have been inserted next to the comments in the table. For full details refer to the source publications. *Abbreviations:* Mol Wt = molecular weight; % ppb = % plasma protein binding; ETPC = effective therapeutic plasma

concentration; hERG (or  $I_{Kr}$ )  $IC_{50} = IC_{50}$  in a hERG-transfected mammalian cell line (cell type indicated) unless otherwise indicated, or at  $I_{Kr}$  (where indicated);  $APD_{90}$  = action potential duration in an in vitro cardiac preparation measured at 90% repolarisation;  $QTc$  = QT interval corrected for any change in heart rate; RT = room temperature (generally 20-25°C); XO = *Xenopus* oocytes; GP = guinea-pig; PF = Purkinje fibres; LH = Langendorff heart; PM = papillary muscle; VM = ventricular muscle; pentobarb = pentobarbitone anaesthesia.

Table 3

Comparison of effects of cisapride (relatively selective  $I_{K_r}$  blocker) with terfenadine (mixed ion channel activity) on action potential duration in different in vitro cardiac preparations

| <b>CISAPRIDE</b>                | <b>0.01 <math>\mu</math>M</b>                     | <b>0.03 <math>\mu</math>M</b> | <b>0.1 <math>\mu</math>M</b>                  | <b>0.3 <math>\mu</math>M</b> | <b>1 <math>\mu</math>M</b> | <b>3 <math>\mu</math>M</b>                                              | <b>10 <math>\mu</math>M</b> |
|---------------------------------|---------------------------------------------------|-------------------------------|-----------------------------------------------|------------------------------|----------------------------|-------------------------------------------------------------------------|-----------------------------|
| hERG $IC_{50}$                  | $IC_{50} = 0.002-0.045 \mu\text{M}$ [226;227;228] |                               |                                               |                              |                            |                                                                         |                             |
| Dog Purkinje fibres             |                                                   |                               |                                               |                              |                            | ----- $\uparrow$ APD <sub>90</sub> ; EADs [230]-----                    |                             |
| Pig Purkinje fibres             | (no published data)                               |                               |                                               |                              |                            |                                                                         |                             |
| Rabbit Purkinje fibres          |                                                   |                               | $\uparrow$ APD <sub>90</sub> ; EADs [404;229] |                              |                            |                                                                         |                             |
| Rabbit ventricular myocytes     |                                                   |                               | $\uparrow$ QT                                 |                              |                            |                                                                         |                             |
| Rabbit Langendorff heart        | (no published data)                               |                               |                                               |                              |                            |                                                                         |                             |
| Guinea-pig ventricular myocytes |                                                   |                               |                                               |                              |                            |                                                                         |                             |
| Guinea-pig papillary muscle     | ----- $\uparrow$ APD <sub>90</sub> [231]-----     |                               |                                               |                              |                            |                                                                         |                             |
| Guinea-pig Langendorff heart    | $\uparrow$ MAPD <sub>90</sub> [405]               |                               |                                               |                              |                            |                                                                         |                             |
| <b>TERFENADINE</b>              | <b>0.01 <math>\mu</math>M</b>                     | <b>0.03 <math>\mu</math>M</b> | <b>0.1 <math>\mu</math>M</b>                  | <b>0.3 <math>\mu</math>M</b> | <b>1 <math>\mu</math>M</b> | <b>3 <math>\mu</math>M</b>                                              | <b>10 <math>\mu</math>M</b> |
| hERG $IC_{50}$                  | $IC_{50} = 0.02-0.20 \mu\text{M}$ [220;232;254]   |                               |                                               |                              |                            |                                                                         |                             |
| Dog Purkinje fibres             | -----no effect [253]-----                         |                               |                                               |                              |                            | no effect [230]                                                         |                             |
| Pig Purkinje fibres             | -----minimal effect [406]-----                    |                               |                                               |                              |                            |                                                                         |                             |
| Rabbit Purkinje fibres          |                                                   |                               |                                               |                              |                            | $\uparrow$ APD <sub>90</sub> [14]-----                                  |                             |
| Rabbit ventricular myocytes     | no effect [407]                                   |                               |                                               |                              |                            |                                                                         |                             |
| Rabbit Langendorff heart        |                                                   |                               |                                               |                              |                            |                                                                         |                             |
| Guinea-pig ventricular myocytes | $\uparrow$ APD <sub>90</sub> [220]-----           |                               | $\uparrow$ APD <sub>90</sub> [408]-----       |                              |                            | $\downarrow$ APD <sub>90</sub> [409] $\uparrow$ APD <sub>90</sub> [409] |                             |
| Guinea-pig papillary muscle     | $\uparrow$ APD <sub>90</sub> [410]-----           |                               | $\downarrow$ APD <sub>90</sub> [411]-----     |                              |                            |                                                                         |                             |
| Guinea-pig Langendorff heart    |                                                   |                               |                                               |                              |                            | $\uparrow$ APD <sub>90</sub> [412] $\downarrow$ APD <sub>90</sub> [412] |                             |



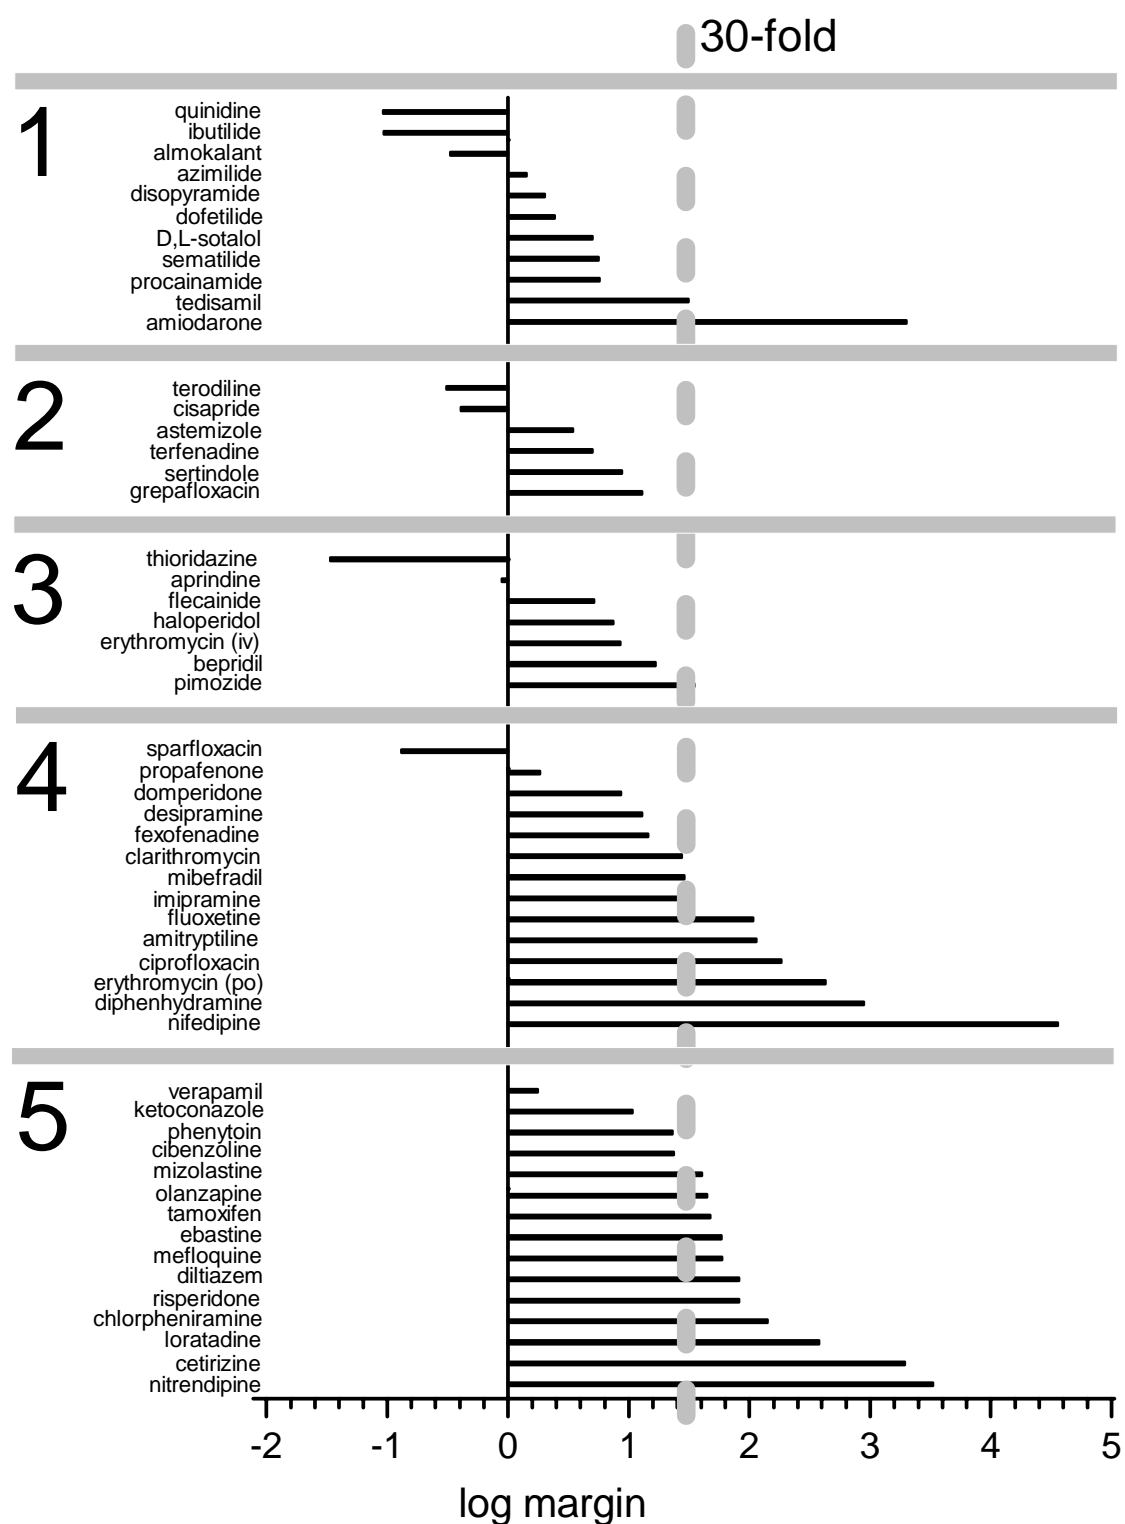

Fig. 2 Log margins of lowest published values for hERG/ $I_{Kr}$   $IC_{50}$  divided by the upper end of the ETPC<sub>unbound</sub> range. Plots to the left of the origin indicate hERG activity within the therapeutic plasma concentration range. The vertical dotted line indicates a ratio of 30. For terfenadine the margin is based on a value of 4 nM for ETPC<sub>unbound</sub> (max) as a concentration attained in the presence of a P<sub>450</sub> inhibitor [225]. For source data refer to Table 2.

## Category 1: dofetilide

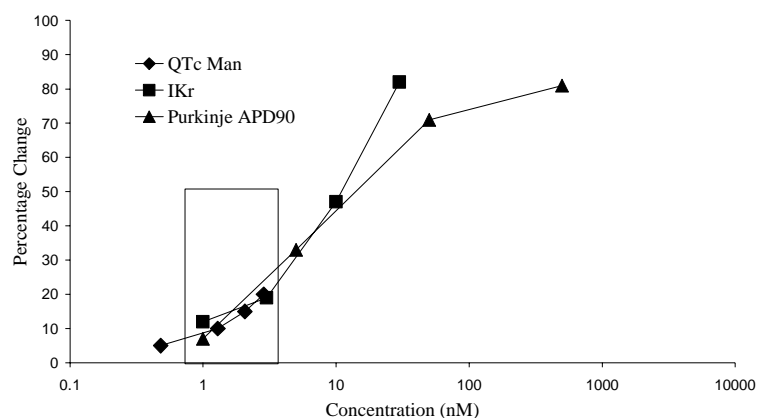

## Category 2: terfenadine

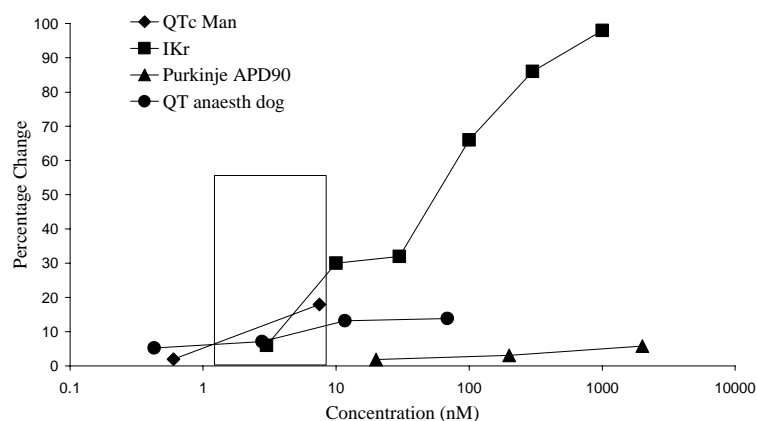

## Category 5: tamoxifen

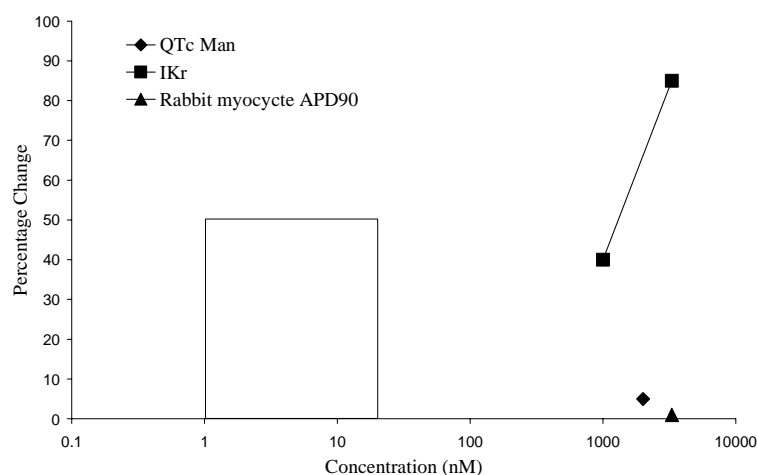

Fig. 3 Overlay plots of concentration-effect data for hERG/ $I_{Kr}$ , APD<sub>90</sub>, QT in dog, and QT in human for representatives of categories 1, 2 and 5. In vivo data are plotted as unbound plasma concentration. Rectangle indicated effective therapeutic plasma concentration (unbound) in humans; for terfenadine this indicates the range obtained in the presence of a P450 inhibitor. For source references see Table 2.

## References

- <sup>1</sup> Raehl CL, Patel AK, LeRoy M. Drug-induced torsade de pointes. *Clin Pharmacy* 1985;4:675-690.
- <sup>2</sup> Woosley RL. Cardiac actions of antihistamines. *Ann Rev Pharmacol Toxicol* 1996;36:233-252.
- <sup>3</sup> Yap YG, Camm AJ. The current cardiac safety situation with antihistamines. *Clin Exp Allergy* 1999;29 suppl 1:15-24.
- <sup>4</sup> Glassman AH, Bigger, JT. Antipsychotic drugs: prolonged QTc interval, torsade de pointes, and sudden death. *Am J Psychiat* 2001;158:1774-1782.
- <sup>5</sup> Darpö, B. Spectrum of drugs prolonging QT interval and the incidence of torsades de pointes. *Eur Heart J Supplements* 2001;3 suppl K:K70-K80.
- <sup>6</sup> Viskin S. Long QT syndromes and torsade de pointes. *Lancet* 1999;354:1625-1633.
- <sup>7</sup> Haverkamp W, Breithardt G, Camm AJ et al. The potential for QT prolongation and proarrhythmia by non-antiarrhythmic drugs: clinical and regulatory implications. *Cardiovasc Res* 2000;47:219-233 (published simultaneously in *Eur Heart J* 2000;21:1216-1231).
- <sup>8</sup> El-Sherif N, Turitto G. The long QT syndrome and torsade de pointes. *Pacing Clin Electrophysiol* 1999;22:91-110.
- <sup>9</sup> De Ponti F, Poluzzi E, Montanaro N. QT-interval prolongation by non-cardiac drugs: lessons to be learned from recent experience. *Eur J Clin Pharmacol* 2000;56:1-18.
- <sup>10</sup> De Ponti F, Poluzzi E, Montanaro N. Organising evidence on QT prolongation and occurrence of *Torsades de Pointes* with non-antiarrhythmic drugs: a call for consensus. *Eur J Clin Pharmacol* 2001;57:185-209.
- <sup>11</sup> Catterall WA, Chandy KG, Gutman GA (eds). *The IUPHAR Compendium of Voltage-gated Ion Channels*, pp. 128-129. Leeds: IUPHAR Media, 2002.
- <sup>12</sup> Committee for Proprietary Medicinal Products (CPMP) Points to Consider: The assessment of the potential for QT interval prolongation by non-cardiovascular medicinal products. CPMP/986/96, 1997.
- <sup>13</sup> Davis AS. The pre-clinical assessment of QT interval prolongation: a comparison of *in vitro* and *in vivo* methods. *Human Exp Toxicol* 1998;17:677-680.
- <sup>14</sup> Caverio I, Mestre M, Guillon J-M, Heuillet E. & Roach A. Preclinical *in vitro* cardiac electrophysiology: a method of predicting arrhythmogenic potential of antihistamines in humans? *Drug Safety* 2000;21 Suppl. 1:19-31 (and Panel Discussion pp. 81-87).
- <sup>15</sup> Carlsson L. Drug-induced torsade de pointes: the perspectives of industry. *Eur Heart J Supplements* 2001;3 suppl K:K114-K120.
- <sup>16</sup> Hammond TG, Carlsson L, Davis AS et al. Methods of collecting and evaluating non-clinical cardiac electrophysiology data in the pharmaceutical industry: results of an international survey. *Cardiovasc Res* 2001;49:741-750.
- <sup>17</sup> SoRelle R Withdrawal of Posicor from market. *Circulation* 1998;98:831-832.
- <sup>18</sup> Gläser S, Steinbach M, Opitz C, Wruck U, Kleber FX. Torsades de Pointes caused by mibefradil. *Eur J Heart Failure* 2001; 3:627-630.
- <sup>19</sup> Martindale Online © The Pharmaceutical Press (2002)
- <sup>20</sup> Goodman and Gilman's 'The Pharmacological Basis of Therapeutics', 8<sup>th</sup> edition, A.G. Gilman et al. (eds)., pp. 1655-1715. New York: Pergamon Press (1990).
- <sup>21</sup> Antzelevitch C, Shimizu W, Yan GX et al. The M cell: its contribution to the ECG and to normal and abnormal electrical function of the heart. *J Cardiovasc Electrophysiol* 1999;10:1124-1152.
- <sup>22</sup> Vos MA, van Opstal JM, Leunissen JDM, Verduyn SC. Electrophysiologic parameters and predisposing factors in the generation of drug-induced Torsade de Pointes arrhythmias. *Pharmacol Ther* 2001;92:109-122.
- <sup>23</sup> Kang J, Chen X-L, Wang L, Rampe D. Interactions of the antimalarial drug mefloquine with the human cardiac potassium channels KvLQT1/minK and HERG. *J Pharmacol Exp Ther* 2001;299:290-296.
- <sup>24</sup> Coker SJ, Batey AJ, Lightbown ID, Díaz ME, Eisner DA. Effects of mefloquine on cardiac contractility and electrical activity *in vivo*, in isolated cardiac preparations, and in single ventricular myocytes. *Br J Pharmacol* 2000;129:323-330.
- <sup>25</sup> Roden DM: Pharmacogenetics and drug-induced arrhythmias. *Cardiovasc Res* 2001;50:224-231.
- <sup>26</sup> Roden DM: Taking the "idio" out of "idiosyncratic": predicting torsades de pointes. *Pacing Clin Electrophysiol* 1998;21:1029-1034.
- <sup>27</sup> Krikler DM, Curry, PVL. Torsade de pointes, an atypical ventricular tachycardia. *Br Heart J* 1976;38:117-120.
- <sup>28</sup> Kodama I, Kamiya K, Toyama J. Cellular electropharmacology of amiodarone. *Cardiovasc Res* 1997;35:13-29.
- <sup>29</sup> Wang J-C, Kiyosue T, Kiritama K, Arita M. Bepridil differentially inhibits two delayed rectifier K<sup>+</sup> currents, I<sub>Kr</sub> and I<sub>Ks</sub>, in guinea-pig ventricular myocytes. *Br J Pharmacol* 1999;128:1733-1738.
- <sup>30</sup> Chouabe C, Drici M-D, Romey G, Barhanin J. Effects of calcium channel blockers on cloned cardiac K<sup>+</sup> channels I<sub>Kr</sub> and I<sub>Ks</sub>. *Thérapie* 2000;55:195-202.
- <sup>31</sup> Hollingshead LM, Faulds D, Fitton A. Bepridil. A review of its pharmacological properties and therapeutic use in stable angina pectoris. *Drugs* 1992;44:835-857.
- <sup>32</sup> Nadamene K, Singh BN. Control of cardiac arrhythmias by calcium antagonists. *Ann NY Acad Sci* 1988;522:536-552.
- <sup>33</sup> Gras J, Llenas J, Palacios JM, Roberts DJ. The role of ketoconazole in the QTc interval prolonging effects of H<sub>1</sub>-antihistamines in a guinea-pig model of arrhythmogenicity. *Br J Pharmacol* 1996;119:187-188.
- <sup>34</sup> Williams A, Redfern WS, Day A, Gracie KJ, Patmore L. Prolongation of QTc interval by ketoconazole in conscious guinea-pigs implanted with ECG telemetry transducers. *Br J Pharmacol* 1996;119:356P (Abstract).
- <sup>35</sup> Gras J, Llenas J. Effects of H<sub>1</sub> antihistamines on

- animal models of QTc prolongation. *Drug Safety* 1999;21 suppl 1:39-44.
- <sup>36</sup> McFadden EP, Clarke JG, Davies GJ, Kaski JC, Haider AW, Maseri A. Effect of intracoronary serotonin on coronary vessels in patients with stable angina and patients with variant angina. *New Engl J Med* 1991;324:648-654.
- <sup>37</sup> Frothingham R. Rates of torsades de pointes associated with ciprofloxacin, ofloxacin, levofloxacin, gatifloxacin, and moxifloxacin. *Pharmacother* 2001;21:1468-1472.
- <sup>38</sup> Furuhashi K, Hayakawa H, Soumi K, Arai H, Watanabe Y, Narita H. Histamine-releasing properties of T-3762, a novel fluoroquinolone antimicrobial agent in intravenous use. I. Effects of doses and infusion rate on blood pressure, heart rate and plasma histamine concentration. *Biol Pharmaceutical Bull* 1998;21:456-460.
- <sup>39</sup> Lieberman P. The use of antihistamines in the prevention and treatment of anaphylaxis and anaphylactoid reactions. *J Allergy Clin Immunol* 1990;86:684-686.
- <sup>40</sup> Pratt CM, Hertz RP, Ellis BE, Crowell SP, Louv W, Moyé L. Risk of developing life-threatening ventricular arrhythmia associated with terfenadine in comparison with over-the-counter antihistamines, ibuprofen and clemastine. *Am J Cardiol* 1994;73:346-352.
- <sup>41</sup> Zareba W, Moss AJ, Rosero SZ, Hajj-Ali R, Konecki J, Andrews M. Electrocardiographic findings in patients with diphenhydramine overdose. *Am J Cardiol* 1997;80:1168-1173.
- <sup>42</sup> Grayson HA, Kennedy JD. Torsades de pointes and nifedipine. *Ann Int Med* 1982;97:144.
- <sup>43</sup> Krikler DM, Rowland E. Torsade de pointes and nifedipine. *Ann Int Med* 1982;97:618-619.
- <sup>44</sup> Grayson HA, Kennedy JD. Nifedipine and torsades de pointes. *Ann Int Med* 1983;99:281-282.
- <sup>45</sup> Peters FPJ, de Zwaan C, Kho L. Prolonged QT interval and ventricular fibrillation after treatment with sublingual nifedipine for malignant hypertension. *Arch Int Med* 1997;157:2665-2666.
- <sup>46</sup> Daleau P, Lessard E, Groleau M-F, Turgeon J. Erythromycin blocks the rapid component of the delayed rectifier potassium current and lengthens repolarization of guinea pig ventricular myocytes. *Circulation* 1995;91:3010-3016.
- <sup>47</sup> Benet LZ, Hoener B-A. Changes in plasma protein binding have little clinical relevance. *Clin Pharmacol Ther* 2002;71:115-121.
- <sup>48</sup> De Ponti F, Poluzzi E, Cavalli A, Recanatini M, Montanaro N. Safety of non-antiarrhythmic drugs that prolong the QT interval or induce torsade de pointes: an overview. *Drug Safety* 2002;25:263-286.
- <sup>49</sup> Sosunov E, Anyukhovsky EP, Rosen MR. Effects of quinidine on repolarisation in canine epicardium, midmyocardium, and endocardium. *Circulation* 1997;96:4011-4018.
- <sup>50</sup> Nattel S, Singh BN. Evolution, mechanisms, and classification of antiarrhythmic drugs: focus on class III actions. *Am J Cardiol* 1999;84:11R-19R.
- <sup>51</sup> Tseng G-N.  $I_{Kr}$ : the hERG channel. *J Mol Cell Cardiol* 2001;33:835-849.
- <sup>52</sup> Spector PS, Curran ME, Keating MT, Sanguinetti MC. Class III antiarrhythmic drugs block HERG, a human cardiac delayed rectifier  $K^+$  channel. *Circ Res* 1996;78:499-503.
- <sup>53</sup> Vandenberg JJ, Walker BD, Campbell TJ. HERG  $K^+$  channels: friend and foe. *Trends Pharmacol Sci* 2001;22:240-246.
- <sup>54</sup> Hondeghem LM, Carlsson L, Duker G. Instability and triangulation of the action potential predict serious proarrhythmia, but action potential prolongation is antiarrhythmic. *Circulation* 2001;103:2004-2013.
- <sup>55</sup> Antzelevitch C, Sicouri S, Litovsky SH et al. Heterogeneity within the ventricular wall: electrophysiology and pharmacology of epicardial, endocardial and M cells. *Circ Res* 1991;69:1427-1449.
- <sup>56</sup> Antzelevitch C. Heterogeneity of cellular repolarization in LQTS: the role of M cells. *Eur Heart J Supplements* 2001;3 suppl K:K2-K16.
- <sup>57</sup> Zhang M-Q. Chemistry underlying the cardiotoxicity of antihistamines. *Current Med Chem* 1997;4:171-184.
- <sup>58</sup> Tagliatela M, Pannaccione A, Castaldo P et al. Molecular basis for the lack of HERG  $K^+$  channel block-related cardiotoxicity by the  $H_1$  receptor blocker cetirizine compared to other second-generation antihistamines. *Mol Pharmacol* 1998;54:113-121.
- <sup>59</sup> Segarra V, López M, Ryder H, Palacios JM, Roberts DJ. Computer-assisted comparison of the structural and electronic dispositions of ebastine and terfenadine. *Drug Safety* 1999;21 suppl 1:45-61.
- <sup>60</sup> Morgan TK, Sullivan ME: An overview of class III electrophysiological agents: A new generation of antiarrhythmic therapy. In *Progress in Medicinal Chemistry*, ed by GP Ellis & DK Luscombe, pp 65-108, Elsevier Science Publishers BV, Amsterdam, 1992.
- <sup>61</sup> Mitcheson JS, Chen J, Lin M, Culbertson C, Sanguinetti MC. A structural basis for drug-induced long QT syndrome. *PNAS* 2000;97:12329-12333.
- <sup>62</sup> Ekins S, Crumb WJ, Sarazan RD, Wikel JH, Wrighton SA. Three-dimensional quantitative structure-activity relationship for inhibition of human ether a-go-go-related gene potassium channel. *J Pharmacol Exp Ther* 2002;301:427-434.
- <sup>63</sup> Crumb W, Caverio I. QT interval prolongation by non-cardiovascular drugs: issues and solutions for novel drug development. *PSTT* 1999;2:270-280.
- <sup>64</sup> Champeroux P, Martel E, Vannier C et al. The preclinical assessment of the risk for QT interval prolongation. *Thérapie* 2000;55:101-109.
- <sup>65</sup> Caverio I, Mestre M, Guillon J-M, Crumb W. Drugs that prolong QT interval as an unwanted effect: assessing their likelihood of inducing hazardous cardiac dysrhythmias. *Exp. Opin. Pharmacother.* 2000;1:947-973.
- <sup>66</sup> Malik M, Camm AJ. Evaluation of drug-induced QT interval prolongation: implications for drug approval and labelling. *Drug Safety* 2001;24:323-351.
- <sup>67</sup> Gralinski MR. The assessment of potential for QT interval prolongation with new pharmaceuticals: impact on drug development. *J Pharmacol Toxicol*



Methods 2000;43:91-99.

<sup>68</sup> Shah RR. Drug-induced prolongation of the QT interval: why the regulatory concern? *Fund Clin Pharmacol* 2002;16:119-124.

<sup>69</sup> Shah RR. Drug-induced prolongation of the QT interval: regulatory dilemmas and implications for approval and labelling of a new chemical entity. *Fund Clin Pharmacol* 2002;16:147-156.

<sup>70</sup> Lu HR, Mariën R, Saels A, De Clerck F. Species plays an important role in drug-induced prolongation of action potential duration and early afterdepolarizations in isolated Purkinje fibres. *J Cardiovasc Electrophysiol* 2002;12:93-102.

<sup>71</sup> Puglisi JL, Bers DM. LabHEART: an interactive computer model of rabbit ventricular myocyte ion channels and Ca transport. *Am J Physiol Cell Physiol* 2001;281:C2049-C2060.

<sup>72</sup> Webster R, Leishman D, Walker D. Towards a drug concentration effect relationship for QT prolongation and torsades de pointes. *Current Opinion Drug Disc Dev* 2002;5:116-126.

<sup>73</sup> Dessertenne F. La tachycardie ventriculaire à deux foyers opposés variables. *Arch Mal Coeur Vaiss* 1966;59:263-272.

<sup>74</sup> MacWilliam JA. Some applications of physiology to medicine: II. Ventricular fibrillation and sudden death. *Br Med J* 1923;2:215-219.

<sup>75</sup> Hollister LE, Kosek JC. Sudden death during treatment with phenothiazine derivatives. *JAMA* 1965;192:93-96.

<sup>76</sup> DRUGDEX®, DrugKnowledge® System, Thomson Micromedex.

<sup>77</sup> Faber TS, Zehender M, Just H. Drug-induced torsade de pointes. Incidence, management and prevention. *Drug Safety* 1994; 11:463-476.

<sup>78</sup> Connolly SJ, Schnell DJ, Page RL, Wilkinson WE, Marcello SR, Pritchett EL. Dose-response relations of azimilide in the management of symptomatic, recurrent, atrial fibrillation. *Am J Cardiol* 2001; 88:974-979.

<sup>79</sup> Stambler BS, Wood MA, Ellenbogen KA, Perry KT, Wakefield LK, VanderLugt JT, and the ibutilide repeat dose study investigators. Efficacy and safety of repeated intravenous doses of ibutilide for rapid conversion of atrial flutter and fibrillation. *Circulation* 1996; 1613-1621.

<sup>80</sup> Wong W, Pavlou HN, Birgersdotter UM, Hilleman DE, Mohiuddin SM, Roden DM. Pharmacology of the class III antiarrhythmic sotalolol in patients with arrhythmias. *Am J Cardiol* 1992; 69:206-212.

<sup>81</sup> Reynolds JEF, Martindale. *The Extra Pharmacopoeia*. The Pharmaceutical Press, London (1989).

<sup>82</sup> De Abajo FJ, Rodriguez LAG. Risk of ventricular arrhythmias associated with non-sedating antihistamine drugs. *Br J Clin Pharmacol* 1999; 47:307-313.

<sup>83</sup> Ball P. Quinolone-induced QT interval prolongation: a not-so-unexpected class effect. *J Antimicrob Chemother* 2000; 45:557-559.

<sup>84</sup> Deamer RL, Wilson DR, Clark DS, Prichard JG. Torsades de pointes associated with high dose levomethadyl acetate (ORLAAM). *J Addict Dis* 2001; 20:7-14.

<sup>85</sup> Stewart DA, Taylor J, Ghosh S et al. Terodiline causes polymorphic ventricular tachycardia due to reduced heart rate and prolongation of QT interval. *Eur J Clin Pharmacol* 1992; 42:577-580.

<sup>86</sup> Singh BN. Safety profile of bepridil determined from clinical trials in chronic stable angina in the United States. *Am J Cardiol* 1992; 69:68D-74D.

<sup>87</sup> Hoehns JD, Stanford RH, Geraets DR, Skelly KS, Lee HC, Gaul BL. Torsades de pointes associated with chlorpromazine: case report and review of associated ventricular arrhythmias. *Pharmacother* 2001; 21:871-883.

<sup>88</sup> Wickers F, Haissaguere M, Palussiere J. QT prolongation and induction of torsades de pointes by flecainide. Apropos of a case. *Arch Mal Coeur Vaiss* 1988; 81:1283-1285.

<sup>89</sup> Prystowsky EN. Inpatient versus outpatient initiation of antiarrhythmic drug therapy for patients with supraventricular tachycardia. *Clin Cardiol* 1994; 17:II7-II10.

<sup>90</sup> Palitzsch KD, Bode H, Huck K, Usadel KH. Successful multiple resuscitation in flecainide poisoning. *Dtsch Med Wochenschr* 1992; 117:56-60.

<sup>91</sup> Hunt N, Stern RA. The association between intravenous haloperidol and torsades de pointes. Three cases and a literature review. *Psychosomatics* 1995; 36:541-549.

<sup>92</sup> Kennelly BM. Comparison of lidoflazine and quinidine in prophylactic treatment of arrhythmias. *Br Heart J* 1977; 39:540-546.

<sup>93</sup> Herrmann HC, Kaplan LM, Bierer BE. QT prolongation and torsades de pointes ventricular tachycardia produced by the tetracyclic antidepressant agent maprotiline. *Am J Cardiol* 1983; 51:904-906.

<sup>94</sup> Abinander EG. QT prolongation and torsades de pointes ventricular tachycardia produced by maprotiline. *Am J Cardiol* 1984; 53:654.

<sup>95</sup> Rialan A, Richard M, Deutsch P, Ouattara B. Torsades de pointes in a patient under long-term maprotiline therapy. Apropos of a case. *Ann Cardiol Angeiol* 1996; 45:123-125.

<sup>96</sup> Lentini S, Rao ML, Schroder R, Luderitz B, Bauriedel G. QT prolongation and torsade de pointes tachycardia during therapy with maprotiline. Differential diagnosis and therapeutic aspects. *Dtsche Med Wochenschrift* 2001; 126:1396-1400.

<sup>97</sup> Curtis RA, Giacona N, Burrows D, Bauman JL, Schaffer M. Fatal maprotiline intoxication. *Drug Intell Clin Pharm* 1984; 18:716-720.

<sup>98</sup> Krahenbuhl S, Sauter B, Kupferschmidt H, Krause M, Wyss PA, Meier PJ. Case report: reversible QT prolongation with torsades de pointes in a patient with pimozone intoxication. *Am J Med Sci* 1995; 309:315-316.

<sup>99</sup> Sartori M, Pratt CM, Young JB. Torsade de pointe. Malignant cardiac arrhythmia induced by amantadine poisoning. *Am J Med* 1984; 77:388-391.

<sup>100</sup> Davison ET. Amitriptyline-induced torsade de pointes. Successful therapy with atrial pacing. *J Electrocardiol* 1985; 18:299-302.

<sup>101</sup> Sing K, Erickson T, Amitai Y, Hryhorczuk D. Chloral hydrate toxicity from oral and intravenous administration. *J Toxicol Clin Toxicol* 1996; 34:101-

- 106.
- <sup>102</sup> Demaziere J, Fourcade JM, Busseuil CT, Adeleine P, Meyer SM, Saissy JM. The hazards of chloroquine self prescription in west Africa. *J Toxicol Clin Toxicol* 1995; 33:369-370.
- <sup>103</sup> Kamuchi H, Nii T, Eguchi K et al. Clarithromycin associated with torsades de pointes. *Jap Circ J* 1999; 63:421-422.
- <sup>104</sup> Schrem SS, Belsky P, Schwartzman D, Slater W. Cocaine-induced torsades de pointes in a patient with the idiopathic long QT syndrome. *Am Heart J* 1990; 120:980-984.
- <sup>105</sup> Singh N, Singh HK, Singh PP, Khan IA. Cocaine-induced torsades de pointes in idiopathic long QT syndrome. *Am J Ther* 2001; 8:299-302.
- <sup>106</sup> Casazza F, Fiorista F, Rustici A, Brambilla G. Torsade de pointes caused by tricyclic antidepressive agents. Description of a clinical case. *Giornale Ital Cardiol* 1986; 16:1058-1061.
- <sup>107</sup> Strasberg B, Coelho A, Welch W, Swiryn S, Bauernfeind R, Rosen K. Doxepin induced torsade de pointes. *Pacing Clin Electrophysiol* 1982; 5:873-877.
- <sup>108</sup> Alter P, Tontsch D, Grimm W. Doxepin-induced torsade de pointes tachycardia. *Annals Int Med* 2001; 135:384-385.
- <sup>109</sup> Pinto YM, van Gelder IC, Heeringa M, Crijns HJGM. QT lengthening and life-threatening arrhythmias associated with fexofenadine. *Lancet* 1999; 353:980.
- <sup>110</sup> Appleby M, Mbewu A, Clarke B. Fluoxetine and ventricular torsade - is there a link? *Int J Cardiol* 1995; 49:178-180.
- <sup>111</sup> Chvilicek JP, Hurlbert BJ, Hill GE. Diuretic-induced hypokalaemia inducing torsades de pointes. *Can J Anaesthesia* 1995; 42:1137-1139.
- <sup>112</sup> Tzivoni D, Keren A, Cohen AM et al. Magnesium therapy for torsades de pointes. *Am J Cardiol* 1984; 53:528-530.
- <sup>113</sup> Cocco G, Strozzi C, Chu D, Pansini R. Torsades de pointes as a manifestation of mexiletine toxicity. *Am Heart J* 1980; 100:878-880.
- <sup>114</sup> Jain A, Jenkins MG. Intracoronary electrocardiogram during torsade des pointes secondary to intracoronary papaverine. *Cathet Cardiovasc Diagn* 1989; 18:255-257.
- <sup>115</sup> Kern MJ, Deligonul U, Serota H, Gudipati C, Buckingham T. Ventricular arrhythmia due to intracoronary papaverine: analysis of QT intervals and coronary vasodilatory reserve. *Cathet Cardiovasc Diagn* 1990; 19:229-236.
- <sup>116</sup> Vrolix M, Piessens J, De Geest H. Torsades de pointes after intracoronary papaverine. *Eur Heart J* 1991; 12:273-276.
- <sup>117</sup> Kerr GD, Ingham G. Torsade de pointes associated with perhexiline maleate therapy. *Aust N Z J Med* 1990; 20:818-820.
- <sup>118</sup> Rosengarten M, Brooks R. Torsade de pointes ventricular tachycardia in a hypothyroid patient treated with propafenone. *Can J Cardiol* 1987; 3:234-239.
- <sup>119</sup> Hii JT, Wyse DG, Gillis AM, Cohen JM, Mitchell LB. Propafenone-induced torsade de pointes: cross-reactivity with quinidine. *Pacing Clin Electrophysiol* 1991; 14:1568-1570.
- <sup>120</sup> Zhanel GG, Ennis K, Vercaigne L et al. A critical review of the fluoroquinolones: focus on respiratory infections. *Drugs* 2002; 62:13-59.
- <sup>121</sup> Verdun F, Mansourati J, Jobic Y et al. Torsades de pointe with spiramycine and metiquazine therapy. Apropos of a case. *Arch Mal Coeur Vaiss* 1997; 90:103-106.
- <sup>122</sup> Lande G, Drouin E, Gauthier C et al. Arrhythmogenic effects of sultopride chlorhydrate: clinical and cellular electrophysiological correlation. *Ann Fr Anaesth Reanim* 1992; 11:629-635.
- <sup>123</sup> Montaz L, Varache N, Harry P et al. Torsades de pointes during sultopride poisoning. *J Toxicol Clin Exp* 1992; 12:481-486.
- <sup>124</sup> Johnson MC, So S, Marsh JW, Muphy AM. QT prolongation and Torsades de Pointes after administration of FK506. *Transplantation* 1992; 53:929-930.
- <sup>125</sup> Hodak SP, Moubarak JB, Rodriquez I, Gelfand MC, Alijani MR, Tracy CM. QT prolongation and near fatal cardiac arrhythmia after intravenous tacrolimus administration. A case report. *Transplantation* 1998; 66:535-537.
- <sup>126</sup> Liljeqvist JA, Edvarsson N. Torsade de pointes tachycardias induced by overdose of zimeldine. *J Cardiovasc Pharmacol* 1989; 14:666-670.
- <sup>127</sup> Moss AJ, Chaikin P, Garcia JD, Gillen M, Roberts DJ, Morganroth J. A review of the cardiac systemic side-effects of antihistamines: ebastine. *Clin Exp Allergy* 1999; 29 Suppl 3:200-205.
- <sup>128</sup> Ravin DS, Levenson JW. Fatal cardiac event following initiation of risperidone therapy. *Ann Pharmacother* 1997; 31:867-870.
- <sup>129</sup> Bojorges R, Pastelin G, Sanchez-Perez S, Medez R, Kabela E. The effects of ajmaline in experimental and clinical arrhythmias and their relation to some electrophysiological parameters of the heart. *J Pharmacol Exp Ther* 1975; 193:182-193.
- <sup>130</sup> Padrini R, Piovan D, Javarnaro A, Cucchini F, Ferrari M. Pharmacokinetics and electrophysiological effects of intravenous ajmaline. *Clin Pharmacokinet* 1993; 25:408-414.
- <sup>131</sup> Padrini R, Compostella L, Piovan D, Javarnaro A, Cucchini F, Ferrari M. Ajmaline test in a patient with chronic renal failure. A pharmacokinetic and pharmacodynamic study. *Clin Pharmacokinet* 1991; 21:150-154.
- <sup>132</sup> Kaul U, Mohan JC, Narula J, Nath CS, Bhatia ML. Ajmaline-induced torsade de pointes. *Cardiology* 1985; 72:140-143.
- <sup>133</sup> Campbell TJ, Williams KM. Therapeutic drug monitoring: antiarrhythmic drugs. *Br J Clin Pharmacol* 2001; 52:21S-34S.
- <sup>134</sup> Johnson JA, Livingston TN. Differences between blacks and whites in plasma protein binding of drugs. *Eur J Clin Pharmacol* 1997; 51:485-488.
- <sup>135</sup> Virag L, Varro A, Papp JG. Effect of disopyramide on potassium currents in rabbit ventricular myocytes. *Naunyn Schmiedebergs Arch Pharmacol* 1998; 357:268-275.
- <sup>136</sup> Wyse KR, Ye V, Campbell TJ. Action potential prolongation exhibits simple dose-dependence for sotalol, but reverse dose-dependence for quinidine

and disopyramide: implications for proarrhythmia due to triggered activity. *J Cardiovasc Pharmacol* 1993; 21:316-322.

<sup>137</sup> Winslow E, Campbell JK, Marshall RJ. Comparative electrophysiological effects of disopyramide and bepridil on rabbit atrial, papillary, and Purkinje tissue: modification by reduced extracellular potassium. *J Cardiovasc Pharmacol* 1986; 8:1208-1216.

<sup>138</sup> Crosby HH, Hamlin RL, Strauch SM. Effects of disopyramide on the electrocardiogram and ventricular function in the unanesthetized dog. *J Vet Pharmacol Ther* 1984; 7:167-175.

<sup>139</sup> Cobbe SM, Hoffmann E, Ritzenhoff A, Brachmann J, Kubler W, Senges J. Actions of disopyramide on potential reentrant pathways and ventricular tachyarrhythmias in conscious dogs during the late post-myocardial infarction phase. *Am J Cardiol* 1984;53:1712-1718.

<sup>140</sup> Nowinski K, Bergfeldt L. "Normal" response of the Q-T interval and Q-T dispersion following intravenous injection of the sodium channel blocker disopyramide: methodological aspects. *Cardiovasc Drugs Ther* 1995; 9:573-580.

<sup>141</sup> Kurita T, Ohe T, Shimizu W et al. Early afterdepolarizationlike activity in patients with class IA induced long QT syndrome and torsades de pointes. *Pacing Clin Electrophys* 1997; 20:695-705.

<sup>142</sup> Coyle JD, Carnes CA, Schaal SF, Muir WW. Electrophysiologic Interactions of Procainamide and N-Acetylprocainamide in Isolated Canine Cardiac Purkinje Fibers. *J Cardiovasc Pharmacol* 1992; 20:197-205.

<sup>143</sup> Yang T, Snyders D, Roden DM. Drug block of I(Kr): model systems and relevance to human arrhythmias. *J Cardiovasc Pharmacol* 2001; 38:737-744.

<sup>144</sup> Yang T, Snyders DJ, Roden DM. Discordance between IKr block and torsade de pointes. *Circulation* 1997; 96:I-554.

<sup>145</sup> Koller B, Franz MR. New classification of moricizine and propafenone based on electrophysiologic and electrocardiographic data from isolated rabbit heart. *J Cardiovasc Pharmacol* 1994; 24:753-760.

<sup>146</sup> Trohman RG, Sahu J. Drug-Induced Torsade de Pointes. *Circulation* 1999; 99:E7.

<sup>147</sup> Po SS, Wang DW, Yang IC, Johnson JPJ, Nie L, Bennett PB. Modulation of HERG potassium channels by extracellular magnesium and quinidine. *J Cardiovasc Pharmacol* 1999; 33:181-185.

<sup>148</sup> Komeichi K, Tohse N, Nakaya H, Shimizu M, Zhu MY, Kanno M. Effects of N-acetylprocainamide and sotalol on ion currents in isolated guinea-pig ventricular myocytes. *Eur J Pharmacol* 1990; 187:313-322.

<sup>149</sup> Lu HR, Marien R, Saels A, De Clerck F. Are there sex-specific differences in ventricular repolarization or in drug-induced early afterdepolarizations in isolated rabbit purkinje fibers? *J Cardiovasc Pharmacol* 2000; 36:132-139.

<sup>150</sup> Benton RE, Sale M, Flockhart DA, Woosley RL. Greater quinidine-induced QTc interval prolongation in women. *Clin Pharmacol Ther* 2000; 67:413-418.

<sup>151</sup> Lu HR, Remeysen P, Somers K, Saels A, De Clerck F. Female gender is a risk factor for drug-induced long QT and cardiac arrhythmias in an in vivo rabbit model. *J Cardiovasc Electrophysiol* 2001; 12:538-545.

<sup>152</sup> Anyukhovsky EP, Sosunov EA, Feinmark SJ, Rosen MR. Effects of quinidine on repolarization in canine epicardium, midmyocardium, and endocardium: II. In vivo study. *Circulation* 1997; 96:4019-4026.

<sup>153</sup> Duker G, Almgren O, Carlsson L. Electrophysiologic and hemodynamic effects of H 234/09 (almokalant), quinidine, and (+)-sotalol in the anesthetized dog. *J Cardiovasc Pharmacol* 1992; 20:458-465.

<sup>154</sup> Darbar D, Fromm MF, Dellorto S, Roden DM. Sympathetic activation enhances QT prolongation by quinidine. *J Cardiovasc Electrophys* 2001; 12:9-14.

<sup>155</sup> Webb CL, Dick M, Rocchini AP et al. Quinidine syncope in children. *J Am Coll Cardiol* 1987; 9:1031-1037.

<sup>156</sup> Darpö B, Almgren O. Almokalant - a selective class III antiarrhythmic compound. *Cardiovasc Drugs Rev* 1996;14:60-83.

<sup>157</sup> Carmeliet E. Use-dependent block and use-dependent unblock of the delayed K<sup>+</sup> current by almokalant in rabbit ventricular myocytes. *Circ Res* 1993;73:857-868.

<sup>158</sup> Abrahamsson C, Duker G, Lundberg C, Carlsson L. Electrophysiological and inotropic effects of H 234/09 (almokalant) in vitro: a comparison with two other novel IK blocking drugs, UK-68,798 (dofetilide) and E-4031. *Cardiovasc Res* 1993;27:861-867.

<sup>159</sup> Ohler A, Amos GJ, Wettwer E, Ravens U. Frequency-dependent effects of E-4031, almokalant, dofetilide and tedisamil on action potential duration: no evidence for "reverse use dependent" block. *Naunyn Schmiedebergs Arch Pharmacol* 1994;349:602-610.

<sup>160</sup> Hallman K, Carlsson L. Prevention of class III-induced proarrhythmias by flecainide in an animal model of the acquired long QT syndrome. *Pharmacol Toxicol* 1995;77:250-254.

<sup>161</sup> Carlsson L, Abrahamsson C, Andersson B, Duker G, Schiller-Linhardt G. Proarrhythmic effects of the class III agent almokalant: importance of infusion rate, QT dispersion, and early afterdepolarisations. *Cardiovasc Res* 1993;27:2186-2193.

<sup>162</sup> Darpö B, Almgren O, Bergstrand R, Franzen S, Edvardsson N. Assessment of frequency dependency of the class III effects of almokalant: a study using programmed stimulation and recording of monophasic action potentials and ventricular paced QT intervals. *Cardiovasc Drugs Ther* 1996;10:539-547.

<sup>163</sup> Veronese ME, McLean S, Hendriks R. Plasma protein binding of amiodarone in a patient population: measurement by erythrocyte partitioning and a novel glass-binding method. *Br J Clin Pharmacol* 1988;26:721-731.

<sup>164</sup> Greene HL. The efficacy of amiodarone in the treatment of ventricular tachycardia or ventricular fibrillation. *Progr Cardiovasc Dis* 1989;31:319-354.

- <sup>165</sup> Kamiya K, Nishiyama A, Yasui K, Hojo M, Sanguinetti MC, Kodama I. Short- and long-term effects of amiodarone on the two components of cardiac delayed rectifier K<sup>+</sup> current. *Circulation* 2001;103:1317-1324.
- <sup>166</sup> Pallandi RT, Campbell TJ. Resting, and rate-dependent depression of V<sub>max</sub> of guinea-pig ventricular action potentials by amiodarone and desethylamiodarone. *Br J Pharmacol* 1987;92:97-103.
- <sup>167</sup> Quintero RA, Biagetti MO. Chronic versus acute effects of amiodarone on the V<sub>max</sub>-conduction velocity relationship and on the space constant in canine myocardium. *J Cardiovasc Pharmacol* 1994;24:122-132.
- <sup>168</sup> Patterson E, Eller BT, Abrams GD, Vasiliades J, Lucchesi BR. Ventricular fibrillation in a conscious canine preparation of sudden coronary death-prevention by short- and long-term amiodarone administration. *Circulation* 1983;68:857-864.
- <sup>169</sup> Winslow E, Campbell JK, Barron E. Effects of amiodarone on cardiac electrophysiology and inducibility of arrhythmias in chronically infarcted dogs: late arrhythmias, haemodynamics, and sympatholytic actions. *J Cardiovasc Pharmacol* 1990;16:896-904.
- <sup>170</sup> Merot J, Charpentier F, Poirier JM, Coutris G, Weissenburger J. Effects of chronic treatment by amiodarone on transmural heterogeneity of canine ventricular repolarization in vivo: interactions with acute sotalol. *Cardiovasc Res* 1999;44:303-314.
- <sup>171</sup> Karam R, Marcello S, Brooks RR, Corey AE, Moore A. Azimilide dihydrochloride, a novel antiarrhythmic agent. *Am J Cardiol* 1998;81:40D-46D.
- <sup>172</sup> Salata JJ, Brooks RR. Pharmacology of azimilide dihydrochloride (NE-10064, a class III antiarrhythmic agent. *Cardiovasc Drug Rev* 1997;15:137-156.
- <sup>173</sup> Bril A, Forest MC, Cheval B, Faivre JF. Combined potassium and calcium channel antagonistic activities as a basis for neutral frequency dependent increase in action potential duration: comparison between BRL-32872 and azimilide. *Cardiovasc Res* 1998;37:130-140.
- <sup>174</sup> Qi XQ, Newman D, Dorian P. Azimilide decreases defibrillation voltage requirements and increases spatial organization during ventricular fibrillation. *J Interv Cardiac Electrophysiol* 1999;3:61-67.
- <sup>175</sup> Xue Y, Yamada C, Chino D, Hashimoto K. Effects of azimilide, a KV<sub>1</sub> and KV<sub>3</sub> blocker, on canine ventricular arrhythmia models. *Eur J Pharmacol* 1999;376:27-35.
- <sup>176</sup> Falk RH, DeCara JM. Dofetilide: a new pure class III antiarrhythmic agent. *Am Heart J* 2000;140:697-706.
- <sup>177</sup> Tham TCK, MacLennan A, Burke MT, Harron DWG. Pharmacodynamics and pharmacokinetics of the class III antiarrhythmic agent dofetilide (UK-68,798) in humans. *J Cardiovasc Pharmacol* 1993;21:507-512.
- <sup>178</sup> Carmeliet E. Voltage- and time-dependent block of the delayed K<sup>+</sup> current in cardiac myocytes by dofetilide. *J Pharmacol Exp Ther* 1992;262:809-817.
- <sup>179</sup> Rampe D, Murawsky MK, Grau J, Lewis EW. The antipsychotic agent sertindole is a high-affinity antagonist of the human cardiac potassium channel HERG. *J Pharmacol Exp Ther* 1998;286:788-793.
- <sup>180</sup> Jurkiewicz NK, Sanguinetti MC. Rate-dependent prolongation of cardiac action potentials by a methanesulfonanilide Class III antiarrhythmic agent. *Circ Res* 1993;72:75-83.
- <sup>181</sup> Kiehn J, Villena P, Beyer T, Brachmann J. Differential effects of the new class III agent dofetilide on potassium currents in guinea pig cardiomyocytes. *J Cardiovasc Pharmacol* 1994;24:566-572.
- <sup>182</sup> Montero M, Schmitt C. Recording of transmembrane action potentials in chronic ischemic heart disease and dilated cardiomyopathy and the effects of the new class III antiarrhythmic agents D-sotalol and dofetilide. *J Cardiovasc Pharmacol* 1996;27:571-577.
- <sup>183</sup> Gout B, Jean J, Bril A. Comparative effects of a potassium channel blocking drug, UK-68,798, and a specific bradycardic agent, UL-FS 49, on exercise-induced ischemia in the dog: significance of diastolic time on ischemic cardiac function. *J Pharmacol Exp Ther* 1992;262:987-994.
- <sup>184</sup> Black SC, Chi L, Mu DX, Lucchesi BR. The antiarrhythmic actions of UK-68,798, a class III antiarrhythmic agent. *J Pharmacol Exp Ther* 1991;258:416-423.
- <sup>185</sup> Andersen HR, Wiggers H, Knudsen LL, Simonsen I, Bloch Tomsen PE, Christiansen N. Dofetilide reduces the incidence of ventricular fibrillation during acute myocardial ischaemia. A randomised study in pigs. *Cardiovasc Res* 1994;28:1635-1640.
- <sup>186</sup> Demolis JL, Funck-Brentano C, Ropers J, Ghadanfar M, Nichols DJ, Jaillon P. Influence of dofetilide on QT-interval duration and dispersion at various heart rates during exercise in humans. *Circulation* 1996;94:1592-1599.
- <sup>187</sup> International Drug Directory 17th Edition.
- <sup>188</sup> Foster RH, Wilde MI, Markham A. Ibutilide - A review of its pharmacological properties and clinical potential in the acute management of atrial flutter and fibrillation. *Drugs* 1997;54:312-330.
- <sup>189</sup> Stambler BS, Wood MA, Ellenbogen KA, Perry KT, Wakefield LK, VanderLugt JT and the Ibutilide Repeat Dose Study Investigators. Efficacy and safety of repeated intravenous doses of ibutilide for rapid conversion of atrial flutter and fibrillation. *Circulation* 1996;1613-1621.
- <sup>190</sup> Yang T, Snyders DJ, Roden DM. Ibutilide, a methanesulfonanilide antiarrhythmic, is a potent blocker of the rapidly activating delayed rectifier K<sup>+</sup> current (IKr) in AT-1 cells. Concentration-, time-, voltage-, and use-dependent effects. *Circulation* 1995;91:1799-1806.
- <sup>191</sup> Lee KS. Ibutilide, a new compound with potent class III antiarrhythmic activity, activates a slow inward Na<sup>+</sup> current in guinea pig ventricular cells. *J Pharmacol Exp Ther* 1992;262:99-108.
- <sup>192</sup> Lee KS, Tsai TD, Lee EW. Membrane activity of Class III antiarrhythmic compounds: a comparison between ibutilide, d-sotalol, E-4031, sematilide and

dofetilide. *Eur J Pharmacol* 1993;234:43-53.

<sup>193</sup> Amos GJ, Abrahamsson C, Duker G, Hondeghem L, Palmer M, Carlsson L. Potassium and calcium current blocking properties of the novel antiarrhythmic agent H 345/52: implications for proarrhythmic potential. *Cardiovasc Res* 2001;49:351-360.

<sup>194</sup> Buchanan LV, Kabell G, Turcotte UM, Brunden MN, Gibson JK. Effects of ibutilide on spontaneous and induced ventricular arrhythmias in 24-hour canine myocardial infarction: a comparative study with sotalol and encainide. *J Cardiovasc Pharmacol* 1992;19:256-263.

<sup>195</sup> Nabih MA, Prcevski P, Fromm BS et al. Effect of ibutilide, a new class III agent, on sustained atrial fibrillation in a canine model of acute ischemia and myocardial dysfunction induced by microembolization. *Pacing Clin Electrophysiol* 1993;16:1975-1983.

<sup>196</sup> Wesley RC, Farkhani F, Morgan D, Zimmerman D. Ibutilide: enhanced defibrillation via plateau sodium current activation. *Am J Physiol* 1993;264:H1269-H1274.

<sup>197</sup> Abi-Mansour P, Carberry PA, McCowan RJ, Henthorn RW, Dunn GH, Perry KT. Conversion efficacy and safety of repeated doses of ibutilide in patients with atrial flutter and atrial fibrillation. *Am Heart J* 1998;136:632-642.

<sup>198</sup> Ishii Y, Muraki K, Kurihara A, Imaizumi Y, Watanabe M. Effects of sematilide, a novel class III antiarrhythmic agent, on membrane currents in rabbit atrial myocytes. *Eur J Pharmacol* 1997;331:295-302.

<sup>199</sup> Ishii Y, Muraki K, Kurihara A, Imaizumi Y, Watanabe M. Effects of sematilide, a novel class III antiarrhythmic agent, on delayed rectifier K<sup>+</sup> current in guinea pig atrial myocytes. *Jpn J Pharmacol* 1996;71:361-365.

<sup>200</sup> Sawanobori T, Adaniya H, Namiki T, Hiraoka M. Rate-dependent effects of sematilide on action potential duration in isolated guinea pig ventricular myocytes. *J Pharmacol Exp Ther* 1994;271:302-310.

<sup>201</sup> Brooks RR, Drexler AP, Maynard AE, Al-Khalidi H, Kostreva DR. Proarrhythmia of azimilide and other class III antiarrhythmic agents in the adrenergically stimulated rabbit. *Exp Biol Med* 2000;223:183-189.

<sup>202</sup> Beatch GN, Davis DR, Laganière, Williams BA. Rate-dependent effects of sematilide on ventricular monophasic action potentials duration and delayed rectifier K<sup>+</sup> current in rabbits. *J Cardiovasc Pharmacol* 1996;28:618-630.

<sup>203</sup> ABPI Data Sheet Compendium, 1999-2000.

<sup>204</sup> Drug Consults.

<sup>205</sup> Carmeliet E. Electrophysiologic and voltage clamp analysis of the effects of sotalol on isolated cardiac muscle and Purkinje fibers. *J Pharmacol Exp Ther* 1985;232:817-825.

<sup>206</sup> Montero M, Schmitt C. Differential effects of D-sotalol on endocardial and epicardial action potentials of human ventricular myocardium in dilated cardiomyopathy. *J Cardiovasc Pharmacol* 1994;24:883-889.

<sup>207</sup> Kidwell GA, Gonzalez MD. Effects of flecainide and D-sotalol on myocardial conduction and

refractoriness: relation to antiarrhythmic and proarrhythmic drug effects. *J Cardiovasc Pharmacol* 1993;21:621-632.

<sup>208</sup> Weissenburger J, Noyer M, Cheymol G, Jaillon P. Electrophysiological effects of cetirizine, astemizole and d-sotalol in a canine model of long QT syndrome. *Clin Exp Allergy* 1999;29:190-196.

<sup>209</sup> Gomoll AW, Lekich RF, Bartek MJ, Comereski CR, Antonaccio MJ. Comparability of the electrophysiologic responses and plasma and myocardial tissue concentrations of sotalol and its d stereoisomer in the dog. *J Cardiovasc Pharmacol* 1990;16:204-211.

<sup>210</sup> Cui G, Sen L, Sager P, Uppal P, Singh BN. Effects of amiodarone, sematilide, and sotalol on QT dispersion. *Am J Cardiol* 1994;74:896-900.

<sup>211</sup> Doggrel SA. Tedisamil: master switch of nature? *Exp Opin Invest Drugs* 2001;10:129-138.

<sup>212</sup> Dukes ID, Cleemann L, Morad M. Tedisamil blocks the transient and delayed rectifier K<sup>+</sup> currents in mammalian cardiac and glial cells. *J Pharmacol Exp Ther* 1990;254:560-569.

<sup>213</sup> Nemeth M, Virag L, Hala O et al. The cellular electrophysiological effects of tedisamil in human atrial and ventricular fibers. *Cardiovasc Res* 1996;31:246-248.

<sup>214</sup> Wallace AA, Stupieniski RF, Baskin EP et al. Cardiac electrophysiologic and antiarrhythmic actions of tedisamil. *J Pharmacol Exp Ther* 1995;273:168-175.

<sup>215</sup> Bargheer K, Bode F, Klein HU, Trappe HJ, Franz MR, Lichtlen PR. Prolongation of monophasic action potential duration and the refractory period in the human heart by tedisamil, a new potassium-blocking agent. *Eur Heart J* 1994;15:1409-1414.

<sup>216</sup> Demolis JL, Martel C, Funck-Brentano C, Sachse A, Weimann H, Jaillon P. Effects of tedisamil, atenolol and their combination on heart and rate-dependent QT interval in healthy volunteers. *Br J Clin Pharmacol* 1997;44:403-409.

<sup>217</sup> Paton DM, Webster DR. Clinical pharmacokinetics of H<sub>1</sub>-receptor antagonists (the antihistamines). *Clin Pharmacokinet* 1985;10:477-497.

<sup>218</sup> Simons FE, Kesselman MS, Giddins NG, Pelech AN, Simons KJ. Astemizole-induced torsade de pointes. *Lancet* 1988;2(8611):624.

<sup>219</sup> Zhou Z, Vorperian VR, Gong Q, Zhang S, January CT. Block of HERG potassium channels by the antihistamine astemizole and its metabolites desmethylastemizole and norastemizole. *J Cardiovasc Electrophysiol* 1999;10:836-843.

<sup>220</sup> Salata JJ, Jurkiewicz NK, Wallace AA, Stupieniski RF, Guinasso PJ, Lynch JJ. Cardiac electrophysiological actions of the histamine H<sub>1</sub>-receptor antagonists astemizole and terfenadine compared with chlorpheniramine and pyrilamine. *Circ Res* 1995;76:110-119.

<sup>221</sup> Adamantidis MM, Lacroix DL, Caron JF, Dupuis BA. Electrophysiological and arrhythmogenic effects of the histamine Type-1 receptor antagonist astemizole on rabbit Purkinje fibers: clinical relevance. *J Cardiovasc Pharmacol* 1995;26:319-327.

- <sup>222</sup> Corinaldesi R, Stanghellini V, Tosetti C et al. The effect of different dosage schedules of cisapride on gastric emptying in idiopathic gastroparesis. *Eur J Clin Pharmacol* 1993;44:429-432.
- <sup>223</sup> Meuldermans W, Van Peer A, Hendrickx J et al. Excretion and biotransformation of cisapride in dogs and humans after oral administration. *Drug Metab Dispos* 1988;16:403-409.
- <sup>224</sup> Gross AS, Goh YD, Addison RS, Shenfield GM. Influence of grapefruit juice on cisapride pharmacokinetics. *Clin Pharmacol Ther* 1999;65:395-401.
- <sup>225</sup> Webster R, Allan G, Anto-Awuakye K et al. Pharmacokinetic/pharmacodynamic assessment of the effects of E4031, cisapride, terfenadine and terodiline on monophasic action potential duration in dog. *Xenobiotica* 2001;31:633-650.
- <sup>226</sup> Rampe D, Roy M-L, Dennis A, Brown AM. A mechanism for the proarrhythmic effects of cisapride (Propulsid): high-affinity blockade of the human cardiac potassium channel HERG. *FEBS Lett* 1997;417:28-32.
- <sup>227</sup> Mohammad S, Zhou Z, Gong Q, January CT. Blockage of the HERG human cardiac K<sup>+</sup> channel by the gastrointestinal prokinetic agent cisapride. *Am J Physiol* 1997;273:H2534-H2538.
- <sup>228</sup> Walker BD, Singleton CB, Bursill JA et al. Inhibition of the human ether-a-go-go-related gene (HERG) potassium channel by cisapride: affinity for open and inactivated states. *Br J Pharmacol* 1999;128:444-450.
- <sup>229</sup> Carlsson L, Amos GJ, Andersson B, Drews L, Duker G, Wadstedt G. Electrophysiological characterization of the prokinetic agents cisapride and mosapride in vivo and in vitro: Implications for proarrhythmic potential. *J Pharmacol Exp Ther* 1997; 282:220-227.
- <sup>230</sup> Gintant GA, Limberis JT, McDermott JS, Wegner CD, Cox BF. The canine Purkinje fiber: An in vitro model system for acquired long QT syndrome and drug-induced arrhythmogenesis. *J Cardiovasc Pharmacol* 2001;37:607-618.
- <sup>231</sup> Kii Y, Ito T. Effects of 5-HT<sub>4</sub>-receptor agonists, cisapride, mosapride citrate, and zacopride, on cardiac action potentials in guinea pig isolated papillary muscles. *J Cardiovasc Pharmacol* 1997;29:670-675.
- <sup>232</sup> Leishman DJ, Helliwell R, Wakerell J, Wallis RM. Effects of E-4031, cisapride, terfenadine and terodiline on cardiac repolarisation in canine Purkinje fibre and HERG channels expressed in HEK293 cells. *Br J Pharmacol* 2001;133:130P (Abstract).
- <sup>233</sup> Sugiyama A, Hashimoto K. Effects of gastrointestinal prokinetic agents, TKS159 and cisapride, on the in situ canine heart assessed by cardiohemodynamic and electrophysiological monitoring. *Toxicol Appl Pharmacol* 1998;152:261-269.
- <sup>234</sup> Modini C, Croci T, Langlois M, de Ponti F, Crema F. Intestinal prokinesia by two esters of 4-amino-5-chloro-2-methoxybenzoic acid: involvement of 5-hydroxytryptamine-4 receptors and dissociation from cardiac effects in vivo. *J Pharmacol Exp Ther* 1999;288:1045-1052.
- <sup>235</sup> Hill SL, Evangelista JK, Pizzi AM, Mobassaleh M, Fulton DR, Berul CI. Proarrhythmia associated with cisapride in children. *Pediatrics* 1998;101:1053-1056.
- <sup>236</sup> Lupoglazoff JM, Bedu A, Faure C et al. Long QT syndrome under cisapride in neonates and infants. *Arch Pediat* 1997;4:509-514.
- <sup>237</sup> Drolet B, Zhang S, Deschenes D et al. Droperidol lengthens cardiac repolarization due to block of the rapid component of the delayed rectifier potassium current. *J Cardiovasc Electrophysiol* 1999;10:1597-1604.
- <sup>238</sup> Adamantidis MM, Kerram P, Dupuis BA. In vitro electrophysiological detection of iatrogenic arrhythmogenicity. *Fundam Clin Pharmacol* 1994;8:391-407.
- <sup>239</sup> Adamantidis MM, Kerram P, Caron JF, Dupuis BA. Droperidol exerts dual effects on repolarization and induces early afterdepolarizations and triggered activity in rabbit Purkinje fibers. *J Pharmacol Exp Ther* 1993;266:884-893.
- <sup>240</sup> Lischke V, Behne M, Doelken P, Schledt U, Probst S, Vettermann J. Droperidol causes a dose-dependent prolongation of the QT interval. *Anesth Analg* 1994;79:983-986.
- <sup>241</sup> Bischoff U, Schmidt C, Netzer R, Pongs O. Effects of fluoroquinolones on HERG currents. *Eur J Pharmacol* 2000;406:341-343.
- <sup>242</sup> Kang J, Wang L, Chen XL, Triggle DJ, Rampe D. Interactions of a series of fluoroquinolone antibacterial drugs with the human cardiac K<sup>+</sup> channel HERG. *Mol Pharmacol* 2001;59:122-126.
- <sup>243</sup> Patmore L, Fraser S, Mair D, Templeton A. Effects of sparfloxacin, grepafloxacin, moxifloxacin, and ciprofloxacin on cardiac action potential duration. *Eur J Pharmacol* 2000;406:449-452.
- <sup>244</sup> Anderson ME, Mazur A, Yang T, Roden DM. Potassium Current Antagonist Properties and Proarrhythmic Consequences of Quinolone Antibiotics. *J Pharmacol Exp Ther* 2001;296:806-810.
- <sup>245</sup> Shimoni Y, Posner P, Spindler AJ, Noble D. The effects of prenylamine on single ventricular myocytes of guinea-pig. *Br J Pharmacol* 1988;94:319-324.
- <sup>246</sup> Aidonidis I, Egel E, Hilbel T, Kuebler W, Brachmann J. Effects of prenylamine and AQ-A 39 on reentrant ventricular arrhythmias induced during the late myocardial infarction period in conscious dogs. *J Cardiovasc Pharmacol* 1993;22:401-407.
- <sup>247</sup> Oakley D, Jennings K, Puritz R, Krikler D, Chamberlain D. The effect of prenylamine on the QT interval of the resting electrocardiogram in patients with angina pectoris. *Postgrad Med J* 1980;56:753-756.
- <sup>248</sup> Frederiksen K, Adamantidis M. The atypical neuroleptic compound sertindole do not induce EAD's in rabbit Purkinje fibres despite a strong blocking effect of the HERG current (I<sub>Kr</sub>): comparison to other neuroleptic drugs. *Soc Neurosci Abs* 2000;26:1-2.
- <sup>249</sup> Drici MD, Wang WX, Liu XE, Woosley RL, Flockhart DA. Prolongation of QT Interval in Isolated Feline Hearts by Antipsychotic Drugs. *Br J*

Clin Psychopharmacol 1998;18:477-481.

<sup>250</sup> Pezawas L, Quiner S, Moertl D et al. Efficacy, cardiac safety and tolerability of sertindole: a drug surveillance. *Int Clin Psychopharmacol* 2000;15:207-214.

<sup>251</sup> Hale A, Azorin J-M, Kasper S et al. Sertindole is associated with a low level of extrapyramidal symptoms in schizophrenic patients: Results of a phase III trial. *Int J Psychiatry Clin Prac* 2000;4:47-54.

<sup>252</sup> Coutant JE, Westmark PA, Nardella PA, Walter SM, Okerholm RA. Determination of terfenadine and terfenadine acid metabolite in plasma using solid-phase extraction and high-performance liquid chromatography with fluorescence detection. *J Chromatogr* 1991;570:139-148.

<sup>253</sup> Lang DG, Wang CM, Wenger TL. Terfenadine alters action potentials in isolated canine Purkinje fibers more than acrivastine. *J Cardiovasc Pharmacol* 1993;22:438-442.

<sup>254</sup> Crumb WJ. Loratidine blockade of K<sup>+</sup> channels in human heart: comparison with terfenadine under physiological conditions. *J Pharmacol Exp Ther* 2000;292:261-264.

<sup>255</sup> Ohmura T, Chachin M, Tarui S et al. Effects of terfenadine, astemizole and epinastine on electrocardiogram in conscious cynomolgus monkeys. *Eur J Pharmacol* 1999;378:169-175.

<sup>256</sup> Lainée P, Perez L, Dubreuil B, Gillet G. Electrocardiographic effects of mizolastine and terfenadine in conscious dogs: Modifications induced by ketoconazole pretreatment. *Jpn Pharmacol Ther* 1998;26: 251-261.

<sup>257</sup> Honig PK, Wortham DC, Zamani K, Conner DP, Mullin JC, Cantilena LR. Terfenadine-ketoconazole interaction. Pharmacokinetic and electrocardiographic consequences. *JAMA* 1993;269:1515-1518.

<sup>258</sup> Hallen B, Gabreilsson J, Nyambati S, Johansson A, Larsson E, Guilbaud O. Concomitant single-dose and multiple-dose pharmacokinetics of terodiline in man, with a note on its enantiomers and major metabolites. *Pharmacol Toxicol* 1995;76:171-177.

<sup>259</sup> Hartigan-Go K, Bateman DN, Daly AK, Thomas SHL. Stereoselective cardiotoxic effects of terodiline. *Clin Pharmacol Ther* 1996;60:89-98.

<sup>260</sup> Yang T, Roden DM. The effects of erythromycin and several antibiotics on IKr in AT-1 cells. [www.fenichel.net/QT%20stuff/pbydrug.htm](http://www.fenichel.net/QT%20stuff/pbydrug.htm). (1999).

<sup>261</sup> Shuba LM, Kasamaki Y, Jones SE, Ogura T, McCullough JR, McDonald TF. Action potentials, contraction, and membrane currents in guinea pig ventricular preparations treated with the antispasmodic agent terodiline. *J Pharmacol Exp Ther* 1999;290:1417-1426.

<sup>262</sup> Jones SE, Ogura T, Shuba L, McDonald TF. Inhibition of the rapid component of the delayed-rectifier K<sup>+</sup> current by therapeutic concentration of the antispasmodic agent terodiline. *Br J Pharmacol* 1998;125:1138-1143.

<sup>263</sup> Hayashi S, Natsukawa T, Suma C, Ukai Y, Yoshikuni Y, Kimura K. Cardiac electrophysiological actions of NS-21 and its active metabolite, RCC-36, compared with terodiline.

Naunyn Schmiedebergs Arch Pharmacol 1997;355:651-658.

<sup>264</sup> Jones SE, Shuba LM, Zhabyeyev P, McCullough JR, McDonald TF. Differences in the effects of urinary incontinence agents S-oxybutynin and terodiline on cardiac K(+) currents and action potentials. *Br J Pharmacol* 2000;131:245-254.

<sup>265</sup> Natsukawa T, Matsuzaki T, Hayashi S, Ukai Y, Yoshikuni Y, Kimura K. Comparison of the effects of NS-21 and terodiline on the QTc interval in dogs. *Gen Pharmacol* 1998;30:137-142.

<sup>266</sup> Pressler ML, Warner MR, Rubart M, Rardon DP, Zipes DP. In vivo and in vitro electrophysiological effects of terodiline on dog myocardium. *J Cardiovasc Electrophys* 1995;6:443-454.

<sup>267</sup> Yokota M, Inagaki H, Uematsu H et al. Non-linear pharmacokinetics of aprindine hydrochloride in oral administration. *Arzneimittel-Forschung* 1987;37:184-188.

<sup>268</sup> Horie M, Yoshida H. An antiarrhythmic agent with class Ib action, aprinidine, inhibits human IKr but not IKs heterologously expressed in COS7 cells. *Circulation* 1999;100:1-280.

<sup>269</sup> Scagliotti D, Strasberg B, Hai HA, Kehoe R, Rosen K. Aprindine-induced polymorphous ventricular tachycardia. *Am J Cardiol* 1982;49:1297-1300.

<sup>270</sup> Kato R, Singh BN. Effects of bepridil on the electrophysiological properties of isolated canine and rabbit myocardial fibers. *Am Heart J* 1986;111:271-279.

<sup>271</sup> Chouabe C, Drici M-D, Romey G, Barhanin J, Lazdunski M. HERG and KvLQT1/IsK, the cardiac K<sup>+</sup> channels involved in long-QT syndromes, are targets for calcium-channel blockers. *Mol Pharmacol* 1998;54:695-703.

<sup>272</sup> Campbell RM, Woosley RL, Iansmith DHS, Roden DM. Lack of triggered automaticity despite repolarization abnormalities due to bepridil and lidoflazine. *Pacing Clin Electrophys* 1990;13:30-36.

<sup>273</sup> Schmitt C, Brachmann J, Holzel C et al. Electrophysiological effects of bepridil in patients with refractory ventricular tachycardia assessed by programmed electrical stimulation. *Clin Cardiol* 1990;13:864-868.

<sup>274</sup> Hill JA, Pepine CJ. Effects of bepridil on the resting electrocardiogram. *Int J Cardiol* 1984;6:319-323.

<sup>275</sup> Studenik C, Lemmens-Gruber R, Heistracher P. Proarrhythmic effects of antidepressants and neuroleptic drugs on isolated, spontaneously beating guinea-pig Purkinje fibers. *Eur J Pharm Sci* 1998;7:113-118.

<sup>276</sup> Austin KL, Mather LE, Philpot CR, McDonald PJ. Intersubject and dose-related variability after intravenous administration of erythromycin. *Br J Clin Pharmacol* 1980;10:273-279.

<sup>277</sup> Rubart M, Pressler ML, Pride HP, Zipes DP. Electrophysiological mechanisms in a canine model of erythromycin-associated long QT syndrome. *Circulation* 1993;88:1832-44

<sup>278</sup> Antzelevitch C, Sun ZQ, Zhang ZQ, Yan GX. Cellular and ionic mechanisms underlying erythromycin-induced long QT intervals and torsade

- de pointes. *J Am Coll Cardiol* 1996;28:1836-1848.
- <sup>279</sup> Oberg KC, Bauman JL. QT interval prolongation and torsades de pointes due to erythromycin lactobionate. *Pharmacother* 1995;15:687-692.
- <sup>280</sup> Ikeda N, Singh BN, Davis LD, Hauswirth O. Effects of flecainide on the electrophysiologic properties of isolated canine and rabbit myocardial fibers. *J Am Coll Cardiol* 1985;5:303-310.
- <sup>281</sup> Winslow E, Campbell JK. Comparative frequency-dependent effects of three class Ic agents, Org 7797, flecainide, and propafenone, on ventricular action potential duration. *J Cardiovasc Pharmacol* 1991;18:911-917.
- <sup>282</sup> Kinnaird AA, Lederman CL, Man RY. Electrophysiological actions of flecainide in normal and infarcted canine Purkinje fibers. *Eur J Pharmacol* 1985;112:57-64.
- <sup>283</sup> Borchard U, Boisten M. Effect of flecainide on action potentials and alternating current-induced arrhythmias in mammalian myocardium. *J Cardiovasc Pharmacol* 1982;4:205-212.
- <sup>284</sup> Paul AA, Witchel HJ, Hancox JC. Inhibition of the current of heterologously expressed HERG potassium channels by flecainide and comparison with quinidine, propafenone and lignocaine. *Br J Pharmacol* 2002;136:717-729.
- <sup>285</sup> Dollery C. *Therapeutic Drugs*, 2<sup>nd</sup> ed. London: Churchill Livingstone, 1999.
- <sup>286</sup> Abernethy DR, Wesche DL, Barbey JT et al. Stereoselective halofantrine disposition and effect: concentration-related QTc prolongation. *Br J Clin Pharmacol* 2001;51:231-237.
- <sup>287</sup> Tie H, Walker BD, Singleton CB et al. Inhibition of HERG potassium channels by the antimalarial agent halofantrine. *Br J Pharmacol* 2000;130:1967-1975.
- <sup>288</sup> Lightbown ID, Lambert JP, Edwards G, Coker SJ. Potentiation of halofantrine-induced QTc prolongation by mefloquine: correlation with blood concentrations of halofantrine. *Br J Pharmacol* 2001;132:197-204.
- <sup>289</sup> Ulrich S, Wurthmann C, Brosz M, Meyer FP. The relationship between serum concentration and therapeutic effect of haloperidol in patients with acute schizophrenia. *Clin Pharmacokinet* 1998;34:227-263.
- <sup>290</sup> Henderson RA, Lane S, Henry JA. Life-threatening ventricular arrhythmia (torsades de pointes) after haloperidol overdose. *Human Exp Toxicol* 1991;10:59-62.
- <sup>291</sup> Hanley SP, Hampton JR. Ventricular arrhythmias associated with lidoflazine: side-effects observed in a randomized trial. *Eur Heart J* 1983;4:889-893.
- <sup>292</sup> Manzanares J, Valenzuela C, Delgado C, Tamargo J. Comparison of six new antidepressants on isolated rat atria. *Arzneimittelforschung* 1988;38:805-809.
- <sup>293</sup> Igawa O, Kotake H, Kurata Y et al. Electrophysiological effects of maprotiline, a tetracyclic antidepressant agent, on isolated cardiac preparations. *J Cardiovasc Pharmacol* 1998;11:167-173.
- <sup>294</sup> Girgis I, Gualberti J, Langan L et al. A prospective study of the effect of I.V. pentamidine therapy on ventricular arrhythmias and QTc prolongation in HIV-infected patients. *Chest* 1997;112:646-653.
- <sup>295</sup> Cardoso JS, Mota-Miranda A, Conde C, Moura B, Rocha-Goncalves F, Lecour H. Inhalatory pentamidine therapy and the duration of the QT interval in HIV-infected patients. *Int J Cardiol* 1997;59:285-289.
- <sup>296</sup> Desta Z, Kerbusch T, Flockhart DA. Effect of clarithromycin on the pharmacokinetics and pharmacodynamics of pimozide in healthy poor and extensive metabolizers of cytochrome P450 2D6 (CYP2D6). *Clin Pharmacol Ther* 1999;65:10-20.
- <sup>297</sup> Drolet B, Rousseau G, Daleau P, Cardinal R, Simard C, Turgeon J. Pimozide (Orap) prolongs cardiac repolarization by blocking the rapid component of the delayed rectifier potassium current in native cardiac myocytes. *J Cardiovasc Pharmacol Ther* 2001;6:255-260.
- <sup>298</sup> Kang J, Wang L, Cai F, Rampe D. High-affinity blockade of the HERG K<sup>+</sup> channel by the neuroleptic pimozide. *Eur J Pharmacol* 2000;392:137-140.
- <sup>299</sup> Fulop G, Philips RA, Shapiro AK, Gomes JA, Shapiro E, Nordlie JW. ECG changes during haloperidol and pimozide treatment of Tourette's disorder. *Am J Psychiatry* 1987;144:673-675.
- <sup>300</sup> Drolet B, Vincent F, Rail J et al. Thioridazine lengthens repolarization of cardiac ventricular myocytes by blocking the delayed-rectifier potassium current. *J Pharmacol Exp Ther* 1999;288:1261-1268.
- <sup>301</sup> Denvir MA, Sood A, Dow R, Brady AJ, Rankin AC. Thioridazine, diarrhoea and torsades de pointe. *J Royal Soc Med* 1998;91:145-147.
- <sup>302</sup> Aoki FY, Stiver HG, Sitar DS, Boudreault A, Ogilvie RI. Prophylactic amantadine dose and plasma concentration-effect relationships in healthy adults. *Clin Pharmacol Ther* 1985;37:128-136.
- <sup>303</sup> Wyse KR, Bursill JA, Campbell TJ. Differential effects of antiarrhythmic agents on post-pause repolarization in cardiac Purkinje fibres. *Clin Exp Pharmacol Physiol* 1996;23:825-829.
- <sup>304</sup> Jo S-H, Youm JB, Lee CO, Earm YE, Ho W-K. Blockade of the HERG human cardiac K<sup>+</sup> channel by the antidepressant drug amitriptyline. *Br J Pharmacol* 2000;129:1474-1480.
- <sup>305</sup> Nishimoto M, Hashimoto H, Ozaki T, Taguchi T, Ohara K, Nakashima M. Effects of imipramine and amitriptyline on intraventricular conduction, effective refractory period, incidence of ventricular arrhythmias induced by programmed stimulation, and on the electrocardiogram after myocardial infarction in dog. *Arch Int Pharmacodyn Ther* 1994;328:39-53.
- <sup>306</sup> Veith RC, Bloom V, Bielski R, Friedel RO. ECG effects of comparable plasma concentrations of desipramine and amitriptyline. *J Clin Psychopharmacol* 1982;2:394-398.
- <sup>307</sup> Bertino JJ, Fish D. The Safety Profile of the Fluoroquinolones. *Clin Ther* 2000;22:798-817.
- <sup>308</sup> Volberg WA, Koci BJ, Su W, Lin J, Zhou J. Blockade of cardiac potassium channel human ether-a-go-go-related gene (HERG) by macrolide antibiotics. *J Pharmacol Exp Ther* 2002;302:320-327.



- <sup>309</sup> Carr RA, Edmonds A, Shi H et al. Steady-state pharmacokinetics and electrocardiographic pharmacodynamics of clarithromycin and loratadine after individual or concomitant administration. *Antimicrob Agents Chemother* 1998;42:1176-1180.
- <sup>310</sup> Kundu S, Williams SR, Nordt SP, Clark RF. Clarithromycin-induced ventricular tachycardia. *Ann Emerg Med* 1997;30:542-544
- <sup>311</sup> Sekkarie MA. Torsades de pointes in two chronic renal failure patients treated with cisapride and clarithromycin. *Am J Kidney Dis* 1997;30:437-439
- <sup>312</sup> Clarkson CW, Chang C, Stolfi A, George WJ, Yamasaki S, Pickoff AS. Electrophysiological effects of high cocaine concentrations on intact canine heart. Evidence for modulation by both heart rate and autonomic nervous system. *Circulation* 1993;87:1046-1047.
- <sup>313</sup> Lukas SE, Sholar M, Lundahl LH et al. Sex differences in plasma cocaine levels and subjective effects after acute cocaine administration in human volunteers. *Psychopharmacol* 1996;125:346-354.
- <sup>314</sup> Van Dyke C, Jatlow P, Ungerer J, Barash PG, Byck R. Oral cocaine: plasma concentrations and central effects. *Science* 1978; 200:211-213.
- <sup>315</sup> Jeffcoat AR, Perez-Reyes M, Hill JM, Sadler BM, Cook CE. Cocaine disposition in humans after intravenous injection, nasal insufflation (snorting), or smoking. *Drug Metab Dispos* 1989;17:153-159.
- <sup>316</sup> Zhang S, Rajamani S, Chen Y et al. Cocaine blocks HERG, but not KvLQT1+minK, potassium channels. *Mol Pharmacol* 2001;59:1069-1076.
- <sup>317</sup> Boutjdir M, Assadi M, el-Sherif N. Electrophysiologic effects of cocaine on subendocardial Purkinje fibers surviving 1 day of myocardial infarction. *J Cardiovasc Electrophysiol* 1995;6:729-736.
- <sup>318</sup> Temesy-Armos PN, Fraker TDJ, Brewster PS, Wilkerson RD. The effects of cocaine on cardiac electrophysiology in conscious, unsedated dogs. *J Cardiovasc Pharmacol* 1992;19:883-891.
- <sup>319</sup> Beckman KJ, Parker RB, Hariman RJ, Gallastegui JL, Javaid JI, Bauman JL. Hemodynamic and electrophysiological actions of cocaine. Effects of sodium bicarbonate as an antidote in dogs. *Circulation* 1991;83:1799-1807.
- <sup>320</sup> Muir WW, Strauch SM, Schaal SF. Effects of tricyclic antidepressant drugs on the electrophysiological properties of dog Purkinje fibres. *J Cardiovasc Pharmacol* 1982;4:82-90.
- <sup>321</sup> Khalifa M, Drolet B, Daleau P et al. Block of potassium currents in guinea pig ventricular myocytes and lengthening of cardiac repolarization in man by the histamine H1 receptor antagonist diphenhydramine. *J Pharmacol Exp Ther* 1999;288:858-865.
- <sup>322</sup> Lefez C, Plante S, Gleaton O, O'Hara G, Gilbert M, Turgeon J. Diphenhydramine Lengthens QTc in Man and prolongs Monophasic Action potential Duration in isolated guinea pig heart. *Circulation* 1994;90:I-248.
- <sup>323</sup> Drolet B, Rousseau G, Daleau P, Cardinal R, Turgeon J. Domperidone Should Not Be Considered a No-Risk Alternative to Cisapride in the Treatment of Gastrointestinal Motility Disorders. *Circulation* 2000;102:1883-1885.
- <sup>324</sup> Dumovic P, Burrows GD, Vohra J, Davies B, Scoggins BA. The effect of tricyclic antidepressants on the heart. *Arch Toxicol* 1976;35:255-262.
- <sup>325</sup> Giardina EG, Cooper TB, Suckow R, Saroff AL. Cardiovascular effects of doxepin in patients with ventricular arrhythmias. *Clin Pharmacol Ther* 1987;42:20-27.
- <sup>326</sup> Baker B, Dorian P, Shapiro C, Schell C, Mitchell J, Irvine MJ. Electrocardiographic effects of fluoxetine and doxepin in patients with major depressive disorder. *J Clin Psychopharmacol* 1997;17:15-21.
- <sup>327</sup> Physicians' Desk Reference® ©1974-2002. The Medical Economics Company.
- <sup>328</sup> Woosley RL, Chen Y, Freiman JP, Gillis RA. Mechanism of the cardiotoxic actions of terfenadine. *JAMA* 1993;269:1532-1536.
- <sup>329</sup> Pratt C, Brown AM, Rampe D et al. Cardiovascular safety of fexofenadine HCl. *Clin Exp Allergy* 1999;29:212-216.
- <sup>330</sup> Thomas D, Gut B, Wendt-Nordahl G, Kiehn J. The antidepressant drug fluoxetine is an inhibitor of human ether-a-go-go-related gene (HERG) potassium channels. *J Pharmacol Exp Ther* 2002;300:543-548.
- <sup>331</sup> Valenzuela C, Sanchez-Chapula J, Delpon E, Elizalde A, Perez O, Tamargo J. Imipramine blocks rapidly activating and delays slowly activating K<sup>+</sup> current activation in guinea pig ventricular myocytes. *Circ Res* 1994;74:687-699.
- <sup>332</sup> Czekalla J, Gastpar M, Hubner WD, Jager D. The effect of hypericum extract on cardiac conduction as seen in the electrocardiogram compared to that of imipramine. *Pharmacopsychiatry* 1997;30:86-88.
- <sup>333</sup> Persson B, Heykants J, Hedner T. Clinical pharmacokinetics of ketanserin. *Clin Pharmacokinet* 1991;20:263-279.
- <sup>334</sup> Zaza A, Malfatto G. Electrophysiologic effects of ketanserin on canine Purkinje fibers, ventricular myocardium and the intact heart. *J Pharmacol Exp Ther* 1989;250:397-405.
- <sup>335</sup> Le Grand B, Talmant JM, Rieu JP, Patoiseau JF, Colpaert FC, John GW. Investigation of the mechanism by which ketanserin prolongs the duration of the cardiac action potential. *J Cardiovasc Pharmacol* 1995;26:803-809.
- <sup>336</sup> Zehender M MT, Hohnloser S, Geibel A, Hartung J, Seiler KU. Incidence and clinical relevance of QT prolongation caused by the new selective serotonin antagonist ketanserin. Multicenter Ketanserin Research Group. *Clin Physiol Biochem* 1990;8 Suppl 3:90-100.
- <sup>337</sup> Kaye GC, Mehta D, Wafa S, Camm AJ. Acute electrophysiologic effects of an HT2-serotonin antagonist, ketanserin, in humans. *Cardiovasc Drugs Ther* 1990;4:1157-1160.
- <sup>338</sup> Roden DM, Iansmith DH, Woosley RL. Frequency-dependent interactions of mexiletine and quinidine on depolarization and repolarization in canine Purkinje fibers. *J Pharmacol Exp Ther* 1987;243:1218-1224.
- <sup>339</sup> Benardeau A, Weissenburger J, Hondeghem L, Ertel E. Effects of the T-Type Ca<sup>2+</sup> channel blocker

- mibefradil on repolarization of guinea pig, rabbit, dog, monkey and human cardiac tissue. *J Pharmacol Exp Ther* 2000;292:561-575.
- <sup>340</sup> Welker HA, Banken L. Mibefradil pharmacokinetic and pharmacodynamic population analysis. *Int J Clin Pharmacol Res* 1998;18:63-71.
- <sup>341</sup> du Souich P, Besner JG, Clozel JP, Welker HA, Lefebvre M, Caille G. Nonlinear kinetics and pharmacologic response to mibefradil. *Clin Pharmacol Ther* 2000;67:249-257.
- <sup>342</sup> Sziligeti P, Banyasz T, Magyar J et al. Intracellular calcium and electrical restitution in mammalian cardiac cells. *Acta Physiologica Scand* 1998;163:139-147.
- <sup>343</sup> Verheijck EE, van Ginneken AC, Wilders R, Bouman LN. Contribution of L-type Ca<sup>2+</sup> current to electrical activity in sinoatrial nodal myocytes of rabbits. *Am J Physiol* 1999;276:H1064-H1077.
- <sup>344</sup> Zhabyeyev P, Missan S, Jones SE, McDonald TF. Low-affinity block of cardiac K(+) currents by nifedipine. *Eur J Pharmacol* 2000;401:137-134.
- <sup>345</sup> Martin SE, Schmarkey LS, Oh DJ. Intracoronary papaverine but not adenosine reduces regional ventricular function. *Cardiovasc Res* 1993;27:2028-2036.
- <sup>346</sup> Christensen CW, Rosen LB, Gal RA, Haseeb M, Lassar TA, Port SC. Coronary vasodilator reserve. Comparison of the effects of papaverine and adenosine on coronary flow, ventricular function, and myocardial metabolism. *Circulation* 1991;83:294-303.
- <sup>347</sup> Inoue T, Asahi S, Takayanagi K, Morooka S, Takabatake Y. QT prolongation and possibility of ventricular arrhythmias after intracoronary papaverine. *Cardiology* 1994;84:9-13.
- <sup>348</sup> Walker BD, Valenzuela SM, Singleton CB et al. Inhibition of HERG channels stably expressed in a mammalian cell line by the antianginal agent perhexiline maleate. *Br J Pharmacol* 1999;127:243-251.
- <sup>349</sup> Vera Z, Gray DR, Harter KW, Janzen DA, Massumi RA, Mason DT. Electrophysiologic properties of perhexiline. *Clin Pharmacol Ther* 1975;18:623-628.
- <sup>350</sup> McDowell IF, Brennan GM, McEneny J et al. The effect of probucol and vitamin E treatment on the oxidation of low-density lipoprotein and forearm vascular responses in humans. *Eur J Clin Invest* 1994;24:759-765.
- <sup>351</sup> Sarubbi B, Ducceschi V, Briglia N et al. Sotalol, propafenone, and flecainide: compared multiparametric analysis of ventricular repolarization in subjects without organic cardiopathy. *Cardiologia* 1996;41:645-651.
- <sup>352</sup> Morganroth J, Hunt T, Dorr MB, Magner D, Talbot GH. The cardiac pharmacodynamics of therapeutic doses of sparfloxacin. *Clin Ther* 1999;21:1171-1181.
- <sup>353</sup> Satoh Y, Sugiyama A, Chiba K, Tamura K, Hashimoto K. QT-prolonging effects of sparfloxacin, a fluoroquinolone antibiotic, assessed in the in vivo canine model with monophasic action potential monitoring. *J Cardiovasc Pharmacol* 2000;36:510-515.
- <sup>354</sup> Chiba K, Sugiyama A, Satoh Y, Shiina H, Hashimoto K. Proarrhythmic Effects of Fluoroquinolone Antibacterial Agents: in vivo Effects as Physiologic Substrate for Torsades. *Toxicol App Pharmacol* 2000;169:8-16.
- <sup>355</sup> DuBell WH, Lederer WJ, Rogers TB. K<sup>+</sup> currents responsible for repolarization in mouse ventricle and their modulation by FK-506 and rapamycin. *Am Phys Soc* 2000;278:H886 - H897.
- <sup>356</sup> Minematsu T, Ohtani H, Sato H, Iga T. Sustained QT Prolongation Induced by Tacrolimus in Guinea Pigs. *Life Sci* 1997;65:197-202.
- <sup>357</sup> Donnelly R, Meredith PA, Miller SH, Howie CA, Elliott HL. Pharmacodynamic modeling of the antihypertensive response to amlodipine. *Clin Pharmacol Ther* 1993;54:303-310.
- <sup>358</sup> Carmeliet E. Effects of cetirizine on the delayed K<sup>+</sup> currents in cardiac cells: comparison with terfenadine. *Br J Pharmacol* 1998;124:663-668.
- <sup>359</sup> Wang WX, Ebert SN, Liu XK, Chen YW, Drici MD, Woosley RL. 'Conventional' antihistamines slow cardiac repolarization in isolated perfused (Langendorff) feline hearts. *J Cardiovasc Pharmacol* 1998;32:123-128.
- <sup>360</sup> Kane KA, Garcia GYB, Sanchez PS, Pastelin G. Electrophysiological effects of lidocaine, 1-chlorpheniramine, and bepridil on rabbit sinus node pacemaker cells. *J Cardiovasc Pharmacol* 1983;5:102-108.
- <sup>361</sup> Harron DWG, Brogden RN, Faulds D, Fitton A. Cibenzoline. A review of its pharmacological properties and therapeutic potential in arrhythmias. *Drugs* 1992;43:734-759.
- <sup>362</sup> Sato T, Wu B, Kiyosue T, Arite M. Effects of cibenzoline, a new class Ia antiarrhythmic drug, on various membrane ionic currents and action potentials of guinea-pig ventricular cells. *Naunyn Schmiedebers Arch Pharmacol* 1994;350:167-173.
- <sup>363</sup> Millar JS, Vaughan Williams EM. Effects on rabbit nodal, atrial, ventricular and Purkinje cell potentials of a new antiarrhythmic drug, cibenzoline, which protects against action potential shortening in hypoxia. *Br J Pharmacol* 1982;75:469-78.
- <sup>364</sup> Arena JP, McArdle JJ, Laxminarayan S. Characterization of the class I antiarrhythmic activity of cibenzoline succinate in guinea pig papillary muscle. *J Pharmacol Exp Ther* 1987;240:441-450.
- <sup>365</sup> Satoh H, Ishii M, Hashimoto K. Effect of cibenzoline, a class I antiarrhythmic drug, on action potential in canine ventricular muscle. *Jpn J Pharmacol* 1987;44:113-119.
- <sup>366</sup> Poole-Wilson PA, Cobbe SM, Fry CH. Acute effects of diuretics on potassium exchange, mechanical function and the action potential in rabbit myocardium. *Clin Sci Mol Med Suppl* 1978;55:555-559.
- <sup>367</sup> Touboul P, Atallah G, Kirkorian G et al. Electrophysiologic effects of cibenzoline in humans related to dose and plasma concentration. *Am Heart J* 1986;112:333-9.
- <sup>368</sup> Schran HF, Petryk L, Chang CT, O'Connor R, Gelbert MB. The pharmacokinetics and bioavailability of clemastine and phenylpropanolamine in single-component and

combination formulations. *J Clin Pharmacol* 1996;36:911-922.

<sup>369</sup> Zhang S, Zhou ZF, Gong QM, Makielski C, January CT. Mechanism of block and identification of the verapamil binding domain to HERG potassium channels. *Circ Res* 1999;84:989-998.

<sup>370</sup> Gjini V, Schreieck J, Korth M, Weyerbrock S, Schomig A, Schmitt C. Frequency dependence in the action of the Class III antiarrhythmic drug dofetilide is modulated by altering L-type calcium current and digitalis glucoside. *J Cardiovasc Pharmacol* 1998;31:95-100.

<sup>371</sup> Raabe NK, Storstein L. Cardiac arrhythmias in patients with small cell lung cancer and cardiac disease before, during and after doxorubicin administration. An evaluation of acute cardiotoxicity by continuous 24-hour Holter monitoring. *Acta Oncol* 1991;30:843-846.

<sup>372</sup> Geary WJ, Garcia JD, Dockhorn RJ. Electrocardiographic safety of 10 mg of ebastine in healthy elderly and young adult volunteers. *Allergy* 1995;50:199.

<sup>373</sup> Wiseman LR, Faulds DE. A review of its pharmacological properties and clinical efficacy in the treatment of allergic disorders. *Drugs* 1996;51:260-277.

<sup>374</sup> Ko CM, Ducic I, Fan J, Shuba YM, Morad M. Suppression of mammalian K<sup>+</sup> channel family by ebastine. *J Pharmacol Exp Ther* 1997;281:233-244.

<sup>375</sup> Hey JA, del Prado M, Sherwood J, Kreutner W, Egan RW. Comparative analysis of the cardiotoxicity proclivities of second generation antihistamines in an experimental model predictive of adverse clinical ECG effects. *Arzneimittelforschung* 1996;46:153-158.

<sup>376</sup> Campbell TJ. Kinetics of onset of rate-dependent effects of Class I antiarrhythmic drugs are important in determining their effects on refractoriness in guinea-pig ventricle, and provide a theoretical basis for their subclassification. *Cardiovasc Res* 1983;17:344-352.

<sup>377</sup> Lee JH, Rosen MR. Use-dependent actions and effects on transmembrane action potentials of flecainide, encainide, and ethmozine in canine purkinje fibers. *J Cardiovasc Pharmacol* 1991;18:285-292

<sup>378</sup> Case CL, Hewett KW, Gillette PC. Developmental electrophysiology of encainide and its major metabolites on the Purkinje fiber action potential. *Biol Neonate* 1994;66:330-338.

<sup>379</sup> Roden DM, Wood AJ, Wilkinson GR, Woolsley RL. Disposition kinetics of encainide and metabolites. *Am J Cardiol* 1986;58:4C-9C.

<sup>380</sup> Samuelsson RG, Harrison DC. Electrophysiological evaluation of encainide with use of monophasic action potential recording. *Am J Cardiol* 1981;48:871-876.

<sup>381</sup> Jackman WM, Zipes DP, Naccarelli GV, Rinkenberger RL, Heger JJ, Prystowsky EN. Electrophysiology of oral encainide. *Am J Cardiol* 1982;49:1270-1278.

<sup>382</sup> Summers KK, Hardin TC, Gore SJ, Graybill JR. Therapeutic drug monitoring of systemic antifungal therapy. *J Antimicrob Chemother* 1997;40:753-764.

<sup>383</sup> Dumaine R, Roy ML, Brown AM. Blockade of HERG and Kv1.5 by ketoconazole. *J Pharmacol Exp Ther* 1998;286:727-735.

<sup>384</sup> Hicks PE, Redfern WS, Patmore L, Sheridan RD. Assessing the arrhythmogenic potential of compounds: regulatory and clinical perspectives, animal models and experience with terfenadine. General Pharmacology/Safety Pharmacology Discussion Group 1997;5th Annual Meeting (Abstract).

<sup>385</sup> Abernethy DR, Barbey JT, Franc J et al. Loratadine and terfenadine interaction with nefazodone: Both antihistamines are associated with QTc prolongation. *Clin Pharmacol Ther* 2001;69:96-103.

<sup>386</sup> Barecki ME, Casciano CN, Johnson WW, Clement RP. In vitro characterization of the inhibition profile of loratadine, desloratadine, and 3-OH-desloratadine for five human cytochrome P-450 enzymes. *Drug Metab Dispos* 2001;29:1173-1175.

<sup>387</sup> Kang J, Chen X-L, Wang L, Rampe D. Interactions of the antimalarial drug mefloquine with the human cardiac potassium channels KvLQT1/minK and HERG. *J Pharmacol Exp Ther* 2001;299:290-296.

<sup>388</sup> Coyne PE, Ajayi F, Harris J, Wiley T, Worthham D, Cantilena LR. ECG pharmacodynamics and pharmacokinetics of halofantrine and mefloquine. *Clin Pharmacol Ther* 1996;59:160.

<sup>389</sup> Mesnil F, Dubruc C, Mentre F, Huet S, Mallet A, Thenot J, P. Pharmacokinetic analysis of mizolastine in healthy young volunteers after single oral and intravenous doses: noncompartmental approach and compartmental modeling. *J Pharmacokinet Biopharm* 1997;25:125-147.

<sup>390</sup> Tagliatalata M, Pannaccione A, Castaldo P, Giorgio G, Annunziato L. Inhibition of HERG1 K(+) channels by the novel second-generation antihistamine mizolastine. *Br J Pharmacol* 2000;131:1081-1088.

<sup>391</sup> Lasseter KC, Shamblen EC, Murdoch AA et al. Steady-state pharmacokinetics of nitrendipine in hepatic insufficiency. *J Cardiovasc Pharmacol* 1984;6 Suppl 7:S977-981.

<sup>392</sup> Kirch W, Hutt HJ, Heidemann H, Ramsch K, Janisch HD, Ohnhaus EE. Drug interactions with nitrendipine. *J Cardiovasc Pharmacol* 1984;6 Suppl 7:S982-985.

<sup>393</sup> Lucas RA, Gilfillan DJ, Bergstrom RF. A pharmacokinetic interaction between carbamazepine and olanzapine: observations on possible mechanism. *Eur J Clin Pharmacol* 1998;54:639-643.

<sup>394</sup> Perry PJ, Lund BC, Sanger T, Beasley C. Olanzapine plasma concentrations and clinical response: acute phase results of the North American Olanzapine Trial. *J Clin Psychopharmacol* 2001;21:14-20.

<sup>395</sup> Danielsson BR, Skold AC, Azarbayjani F. Class III antiarrhythmics and phenytoin: teratogenicity due to embryonic cardiac dysrhythmia and reoxygenation damage. *Curr Pharm Des* 2001;7:787-802.

<sup>396</sup> McConville BJ, Arvanitis LA, Thyrum PT et al. Pharmacokinetics, tolerability, and clinical effectiveness of quetiapine fumarate: an open-label

trial in adolescents with psychotic disorders. *J Clin Psychiatry* 2000;61:252-260.

<sup>397</sup> Pollak T, Zbuck K. Quetiapine fumarate overdose: Clinical and pharmacokinetic lessons from extreme conditions. *Clin Pharmacol Ther* 2000;68:92-97.

<sup>398</sup> Lien EA, Solheim E, Lea OA, Lundgren S, Kvinnsland S, Ueland PM. Distribution of 4-hydroxy-N-desmethyltamoxifen and other tamoxifen metabolites in human biological fluids during tamoxifen treatment. *Cancer Res* 1989;49:2175-2183.

<sup>399</sup> Liu X, Katchman A, Ebert S, Woosley R. The Antiestrogen Tamoxifen Blocks the Delayed Rectifier Potassium Current I<sub>Kr</sub> in Rabbit Ventricular Myocytes. *J Pharmacol Exp Ther* 1998;287:877-883.

<sup>400</sup> Trump DL, Smith DC, Ellis PG et al. High-dose oral tamoxifen, a potential multidrug-resistance-reversal agent: phase I trial in combination with vinblastine. *J Natl Cancer Inst* 1992;84:1811-1816.

<sup>401</sup> Kinnaird AAA, Man RYK. The interaction of cycle length with the electrophysiological effect of lidocaine, tocainide and verapamil on canine Purkinje fibers. *Eur J Pharmacol* 1984;99:63-71.

<sup>402</sup> Zhang S, Sawanobori T, Hirano Y, M. H. Multiple modulations of action potential duration by different calcium channel blocking agents in guinea pig ventricular myocytes. *J Cardiovasc Pharmacol* 1997;30:489-496.

<sup>403</sup> Bril A, Gout B, Bonhomme M et al. Combined potassium and calcium channel blocking activities as a basis for antiarrhythmic efficacy with low proarrhythmic risk: experimental profile of BRL-32872. *J Pharmacol Exp Ther* 1996;276:637-646.

<sup>404</sup> Puisieux FL, Adamantidis MM, Dumotier BM, Dupuis BA. Cisapride-induced prolongation of cardiac action potential and early afterdepolarizations in rabbit Purkinje fibres. *Br J Pharmacol* 1996;117:1377-1379.

<sup>405</sup> Drolet B, Khalifa M, Daleau P, Hamelin BA, Turgeon J. Block of the rapid component of the delayed-rectifier potassium current by the prokinetic agent cisapride underlies drug-related lengthening of the QT interval. *Circulation* 1998;97:204-210.

<sup>406</sup> Maginn M, Algate CM, Gower AJ, Munt PL, Algate DR. Terfenadine evoked prolongation of the QTc interval in isolated porcine fibres – an experimental model for the assessment of arrhythmogenic potential in man. *NS Arch Pharmacol* 1998;358 suppl 1:P57.39 (Abstract).

<sup>407</sup> Nishio M, Habuchi Y, Tanaka H, Morikawa J, Yamamoto T, Kashima K. Blockage by terfenadine of the adenosine triphosphate (ATP)-sensitive K<sup>+</sup> current in rabbit ventricular myocytes. *J Pharmacol Exp Ther* 1998;287:293-300.

<sup>408</sup> Kato Y, Mori T, Ohmori K, Ichimura M. Effect of terfenadine and KW-4679, a novel antiallergic compound, on action potential of guinea pig ventricular myocytes. *Jap J Pharmacol* 1996; 70:199-202.

<sup>409</sup> Ming Z, Nordin C. Terfenadine blocks time-dependent Ca<sup>2+</sup>, Na<sup>+</sup>, and K<sup>+</sup> channels in guinea

pig ventricular myocytes. *J Cardiovasc Pharmacol* 1995; 26:761-769

<sup>410</sup> Kii Y, Inui A, Ito T. Effects of histamine H<sub>1</sub> receptor antagonists on action potentials in guinea-pig isolated papillary muscles. *Arch Int Pharmacodyn Ther* 1996;331:59-73.

<sup>411</sup> Fraser S, Templeton AGB, Rothaul LM, Wood LM, Patmore L, Sheridan RD. Electrophysiological effects of terfenadine in the guinea-pig Langendorff heart and isolated papillary muscle preparations. *Br. J. Pharmacol* 1997;122:390P (Abstract).

<sup>412</sup> Pinney SP, Koller BS, Franz MR, Woosley RL. Terfenadine increases the QT interval in isolated guinea pig heart. *J Cardiovasc Pharmacol* 1995;25:30-34.
